# Supplementary material
Source: PubMed Central journal article supplement (PMC6300313)
Supplement: ja7b08486_si_001.pdf [file ja7b08486_si_001.pdf]

# Terminal Electron-Proton Transfer Dynamics in the Quinone Reduction of Respiratory Complex I

Ana P. Gamiz-Hernandez<sup>1,\*</sup>, Alexander Jussupow<sup>1</sup>, Mikael P. Johansson<sup>1,2</sup>, Ville R. I. Kaila<sup>1,\*</sup>

<sup>1</sup>Department Chemie, Technische Universität München (TUM) Lichtenbergstraße 4, D-85747 Garching, Germany.

<sup>2</sup>Department of Chemistry, University of Helsinki, P.O. Box 55, FI-00014 Helsinki, Finland

## Table of Contents

**Figure S1.** Relative position of cofactors in complex I from *Thermus thermophilus* (PDB ID: 4HEA) and labels used for the iron-sulfur clusters.

**Figure S2.** Comparison of distances between quinone (O5) and His-38 (NE2/HE2) from Nqo4 obtained from classical MD trajectories of quinone modeled within complex I (PDB ID:1HEA). The quinone was modeled in the Q (neutral), Q<sup>•-</sup> (semiquinone) and Q<sup>2-</sup> (doubly reduced) states. Panel A) refers to simulations performed with ubiquinone and panel B) to simulations with menaquinone.

**Figure S3.** Comparison of Q-binding motifs in complex I obtained from a QM/MM relaxation of UQ and MQ in the oxidized states. Panel A) shows UQ forming two hydrogen-bonds (shown in black) with Tyr-87 and His-38 (left, 2-H-bonded UQ) and stacked conformations forming one hydrogen bond (shown in black) with Tyr-87 (right, 1-H-bonded UQ). Panel B) shows menaquinone in the hydrogen-bonded (left, 2-H-bonded MQ) and stacked (right, 1-H-bonded MQ) conformations. The H-bond with Thr-135 (shown in pink) does not formed in all simulations, and the residue is not fully conserved.

**Figure S4.** Comparison of the two Q-binding models obtained from QM-cluster models, with hydrogen-bonded and stacked conformations shown in full and pastel colors, respectively. DFT optimizations were performed with C $\beta$  atoms kept fixed.

**Figure S5.** Comparison of distances between UQ (O2) and N2 (Fe closest to UQ) from 10 ns classical MD trajectories of UQ in the Q (neutral), Q<sup>•-</sup> (semiquinone), and Q<sup>2-</sup> (doubly reduced) states.

**Figure S6.** Correlation between the N2/Q and Q/His-38 distances obtained from a 10 ns simulation of the oxidized UQ in complex I. The UQ adopts both stacked conformation (N2-Q distance of 11 Å; H38-Q distance of 3.5 Å) or the hydrogen-bonded conformations (N2-Q distance of 10.5 Å; H38-Q distance of 6 Å).

**Figure S7.** IR spectra calculated for UQ DFT-models (left) and MQ DFT-models (right) in the hydrogen-bonded (top) and stacked (bottom) conformations in the oxidized (UQ) and semiquinone (Q<sup>•-</sup>) states. The bottom figure indicates the normal modes coupled to the IR-transition. The spectra were calculated at the B3LYP-D3/def2-SVP/ $\epsilon=4$  level with no scaling of frequencies.

**Figure S8.** Redox potential computed from 5 ps QM/MM MD trajectories for the hydrogen-bonded and stacked systems. A) Histogram comparison of Q[ox] in the hydrogen-bonded and stacked conformation relative to the redox potential of N2. B) The  $E_m$  for the Q/SQ pair was estimated by fixing the redox state of the ISCs to N2[ox] or N2[red], while N6B[ox] and N6A[ox]. C) The  $E_m$  values for the two ISCs closest to Q, N2 and N6B were obtained by fixing the redox state to Q[ox].

**Figure S9.** Redox potential of the Q/SQ couple and the N2, N6A, N6B ISCs obtained from Poisson-Boltzmann (PB) electrostatic calculations. The reported values are obtained as a PB average for the hydrogen-bonded (in red) and the stacked (in blue) conformation based on the QM/MM simulations of the combined system.

**Figure S10.** Dependence of the protein dielectric constant on the calculated redox potential,  $E_m$ , for Q/SQ and N2[ox/red]. The protein is model with all explicit atoms using the dielectric constant shown on the x-axis, while water is modeled as a continuum with a high dielectric constant. Cofactors model compound values were calculated from electronic energies values as described in the Methods section.

**Figure S11.** Models employed for the QM/MM MD simulations. A) QM/MM model with subunits Nqo4, Nqo5, Nqo6, Nqo7, Nqo8 and Nqo9 of complex I (PDB ID:4HEA). The models comprise the quinone, and ISCs N2, N6A, and N6B B) QM part of the QM/MM models. The N2 subsystem (within dotted black lines), the QM model of the Q subsystem (within dotted blue lines), and the combined N2/Q system (within dotted red lines).

**Figure S12.** QM/MM dynamics of the electron transfer between N2 and Q in A) the hydrogen-bonded and B) the stacked conformations. Comparison of the total Mulliken spin population on Q obtained at DFT level, by employing different density functionals (B3LYP, CAM-B3LYP, BHLYP).

Figure S13. Dynamics of Arg-84 near the N2/N6B centers upon electron transfer in the hydrogen-bonded Q configuration. The electron transfer event that takes place between 1.5 - 3 ps (see Figure 3, main text) and leads to a structural reorganization of Arg-84, which makes a transient contact with Cys-101 of the N6B center. After the electron transfer, the initial contact with Cys-140 of the N2 center is restored.

Figure S14. Comparison of the calculated pH dependent redox potential for N2 for the wild type structure, and for the H169M and R84A mutations in subunit Nqo4. The calculated and measured values at pH=7 were set equal. Experimental data obtained from.<sup>1</sup>

Figure S15. QM/MM dynamics of the second electron transfer from N2 to SQ with protonated His-169. The top figure shows that the electron localizes to N2 and SQ (see Figure 4 of the main text). The bottom figure shows that no proton transfer is observed between Y87 and SQ (red), H38 and SQ (orange) or D139 and H38 (blue).

Figure S16. QM/MM dynamics of the second electron transfer from N2 to SQ upon deprotonation of His-169 (N $\delta$  protonated).

Figure S17. Water molecules surrounding Q and the ISCs after 100 ns classical MD simulations of complex I. The blue surface represents the Q while N2 and N6B are shown as yellow surfaces. Several histidine and serine residues surround the cofactors, and could help in providing water wires to the bulk solvent from the hydrophilic domain of complex I. Data from.<sup>2</sup>

Figure S18. A) Structure and B) B3LYP-D3/def2-TZVPP/ $\epsilon=4$  energetics (in kcal mol<sup>-1</sup>) of hydrogen-bonded (right) and stacked (left) binding modes of menaquinone (MQ) in complex I. Q and SQ refer to oxidized and semiquinone species, while N2[ox] and N2[red] refer to oxidized (2Fe[II]2Fe[III]) and reduced (3Fe[II]1Fe[III]) states of N2, respectively. Non-adiabatic and adiabatic electron transfer energetics are calculated by relaxing the initial electron donor state (N2/Q), or by relaxing both the initial (N2[red]/Q) and final (N2[ox]/SQ) states, respectively.

Table S1. Energetics of Q-binding and electron transfer between N2 and UQ at the DFT B3LYP-D3/def2-TZVPP/ $\epsilon=4$  and TPSSH-D3/def2-TZVPP/ $\epsilon=4$  levels (in parenthesis). Q and SQ refer to oxidized and semiquinone states, respectively; N2[ox] and N2[red] refer to oxidized (2Fe[II]2Fe[III]) and reduced (3Fe[II]1Fe[III]) states of N2, respectively. Non-adiabatic and adiabatic electron transfer energetics are calculated by relaxing the initial electron donor state (N2/Q), or by relaxing both the initial (N2[red]/Q) and final (N2[ox]/SQ) states, respectively.

Table S2. Energetics of MQ-binding and electron transfer between N2 and MQ at the DFT B3LYP-D3/def2-TZVPP/ $\epsilon=4$ . Q and SQ refer to oxidized and semiquinone states, respectively; N2[ox] and N2[red] refer to oxidized (2Fe[II]2Fe[III]) and reduced (3Fe[II]1Fe[III]) states of N2, respectively. Non-adiabatic and adiabatic electron transfer energetics are calculated by relaxing the initial electron donor state (N2/Q), or by relaxing both the initial (N2[red]/Q) and final (N2[ox]/SQ) states, respectively.

Table S3. Redox state-dependence of the pK<sub>a</sub> of His-169. The table shows the pK<sub>a</sub> values of His-169 obtained by PB electrostatics of the hydrogen-bonded and stacked conformations of Q, while maintaining the redox state of the N2 cluster fixed to the oxidized (N2[ox]) or reduced (N2[red]) state, respectively.

Table S4. Comparison of redox potentials calculated for a large (E<sub>m</sub><sup>1</sup>) and small (E<sub>m</sub><sup>2</sup>) complex I setups. Coordinates were obtained from a 1 ns relaxation of all subunits of complex I crystal structure while UQ was modelled in the hydrogen-bonded conformation. C $\beta$  atoms were fixed. FMN, N1B, N4, N5, N6A, N6B, N2 and quinone (UQ) were modelled as titratable redox groups. N1A and N3 were fixed in the reduced state, while N7 and FMN were fixed in the oxidized state. Lys, Arg, His, Glu, Asp, Tyr and Cys were considered as titratable residues, and all other protein atoms were treated explicitly with atomic partial charges in a low dielectric constant, while water was treated as a continuum with high dielectric constant. We considered nine (five) conformations for the large (small) system prepared with different alternated oxidation states of the cofactors by optimizing only hydrogen-atom positions. Redox potentials are reported as Poisson-Boltzmann average of these conformations. The intrinsic error of these calculations ranges from ca. 60 mV for organic compounds<sup>7</sup> to ca. 200 mV for ISC.<sup>8</sup>

Table S5. Calculated redox potentials for quinone (Q/SQ) model compounds [E<sub>m</sub> mV vs. SHE] used in PBE calculations in the protein. E<sub>m</sub> values for UQ and MQ were calculated within the protein environment. Conversion from SCE electrode to SHE values were obtained by adding + 241 mV to the SCE potentials.<sup>5</sup>

Tables S6. Coordinates of the N2 cluster and ubiquinone (UQ)/menaquinone (MQ), in different oxidation states, optimized at the B3LYP-D3 level, employing the def2-TZVP (S, Fe) and def2-SVP (H, C, N, O) basis sets, using the COSMO solvation model with  $\epsilon=4$ , along with SCF energies using the def2-TZVPP basis set. Standard XYZ format in Ångström units, energies [E] in Hartree. Atoms marked with an asterisk (\*) were kept frozen during the geometry optimization procedure.

- Table S6.1 Ubiquinone stacked, Q N2[red]
- Table S6.2 Ubiquinone stacked, Q N2[ox]
- Table S6.3 Ubiquinone stacked, SQ N2[ox]
- Table S6.4 Ubiquinone H-bonded, Q N2[red]
- Table S6.5 Ubiquinone H-bonded, Q N2[ox]
- Table S6.6 Ubiquinone H-bonded, SQ N2[ox]
- Table S6.7 Menaquinone stacked, Q N2[red]
- Table S6.8 Menaquinone stacked, Q N2[ox]
- Table S6.9 Menaquinone stacked, SQ N2[ox]
- Table S6.10 Menaquinone H-bonded, Q N2[red]
- Table S6.11 Menaquinone H-bonded, Q N2[ox]
- Table S6.12 Menaquinone H-bonded, SQ N2[ox]

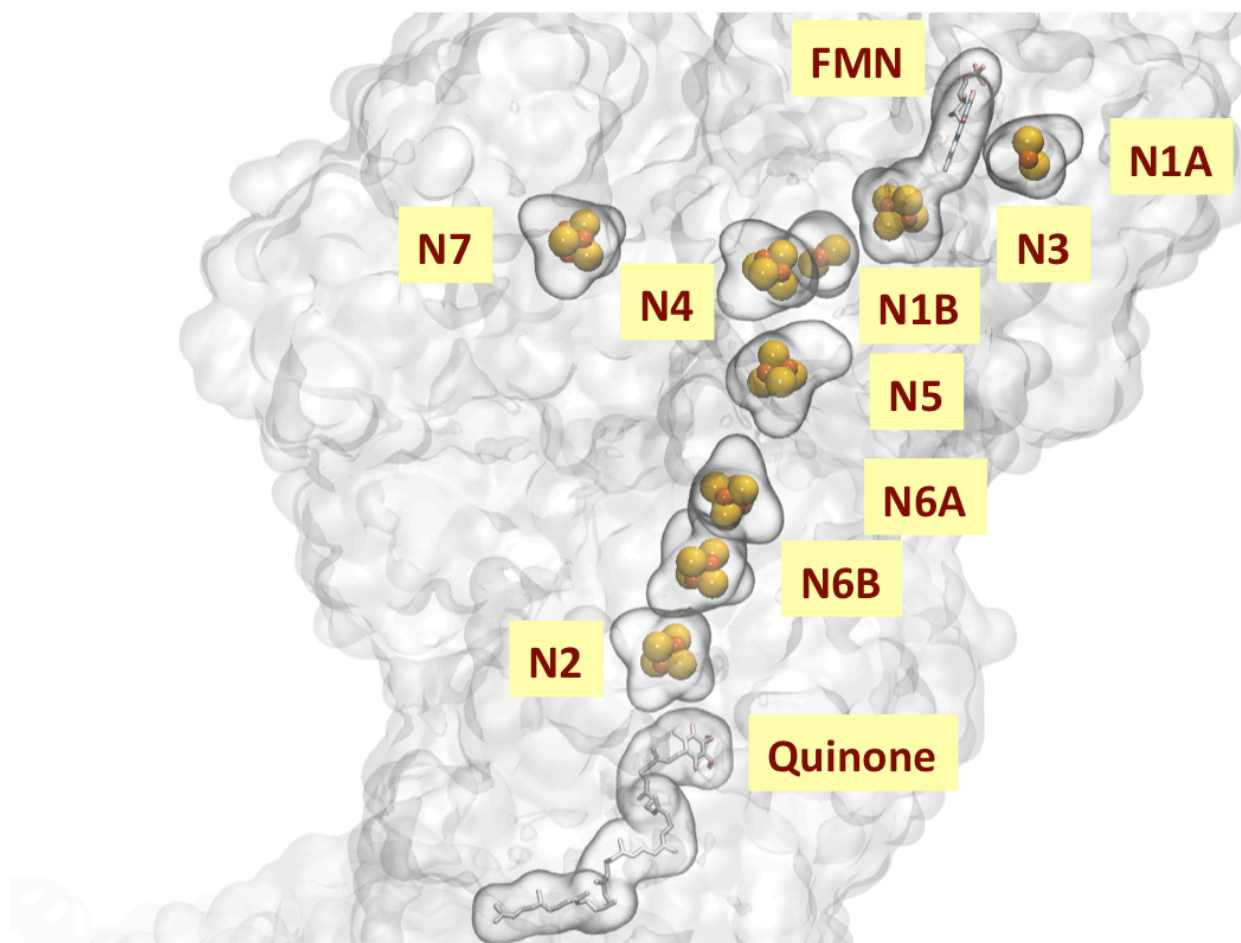

Figure S1. Relative position of cofactors in complex I from *Thermus thermophilus* (PDB ID: 4HEA) and labels used for the iron-sulfur clusters.

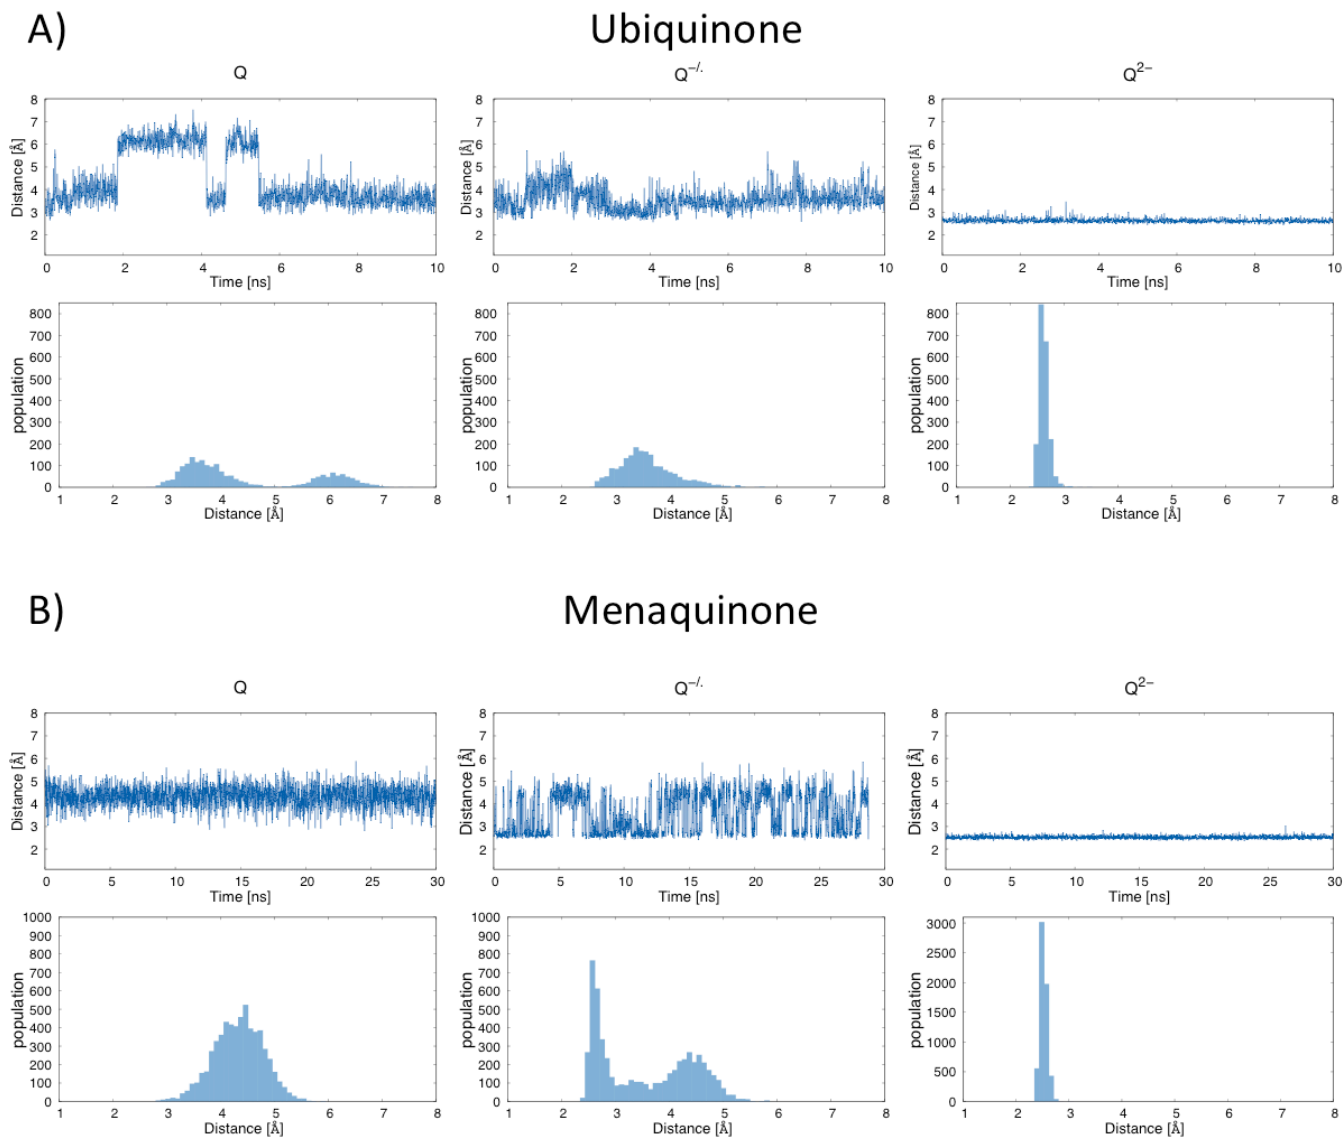

**Figure S2.** Comparison of distances between quinone (O5) and His-38 (NE2/HE2) from Nqo4 obtained from classical MD trajectories of quinone modeled within complex I (PDB ID:1HEA). The quinone was modeled in the Q (neutral),  $Q^{\bullet-}$  (semiquinone) and  $Q^{2-}$  (doubly reduced) states. Panel A) refers to simulations performed with ubiquinone and panel B) to simulations with menaquinone.

A)

## Ubiquinone

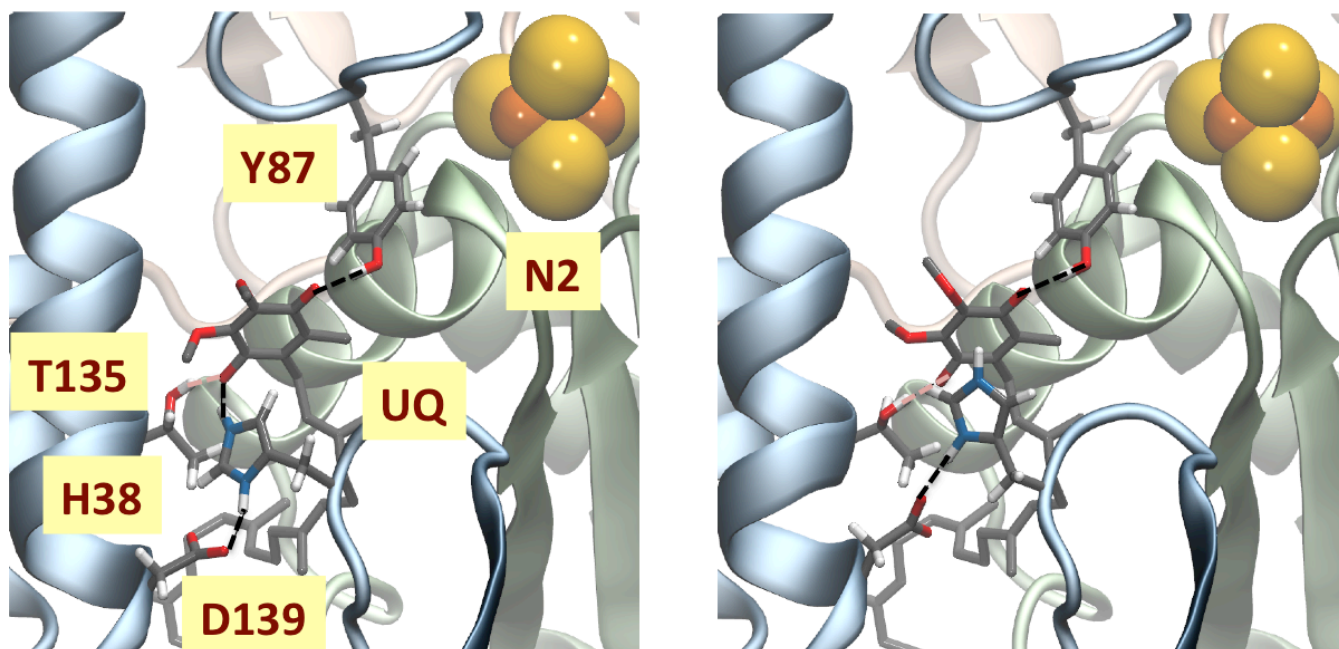

B)

## Menaquinone

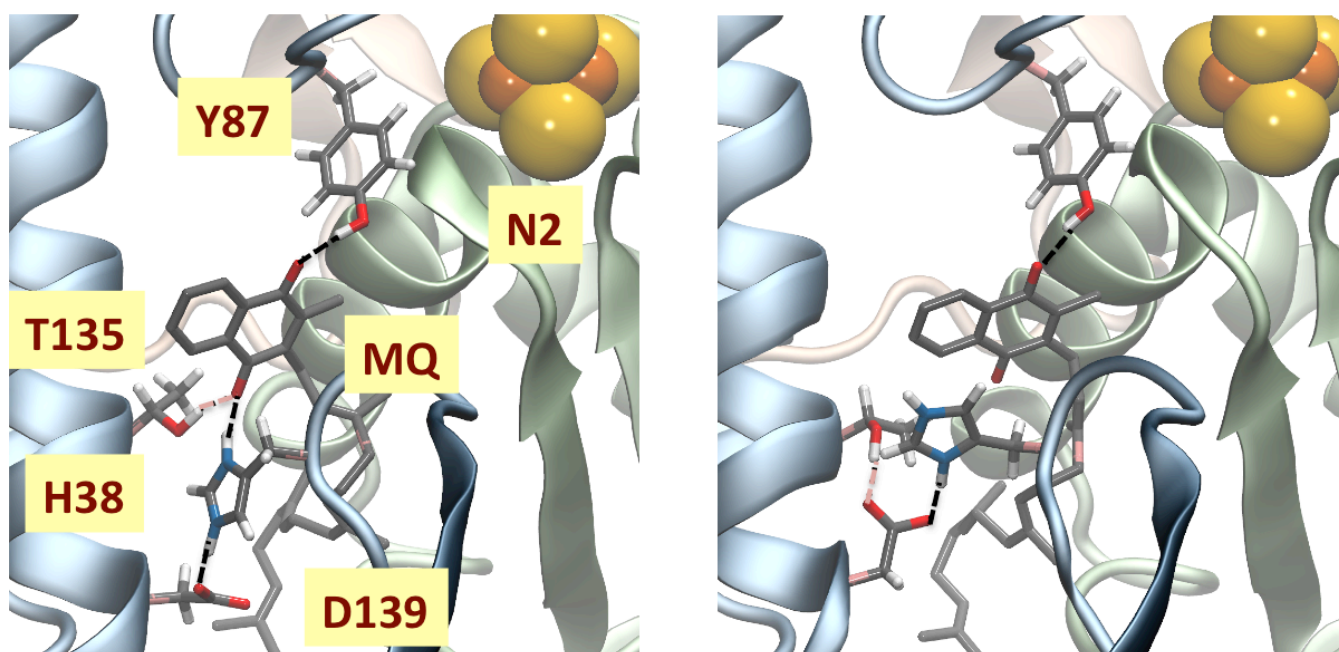

*Figure S3. Comparison of Q-binding motifs in complex I obtained from a QM/MM relaxation of UQ and MQ in the oxidized states. Panel A) shows UQ forming two hydrogen-bonds (shown in black) with Tyr-87 and His-38 (left, 2-H-bonded UQ) and stacked conformations forming one hydrogen bond (shown in black) with Tyr-87 (right, 1-H-bonded UQ). Panel B) shows menaquinone in the hydrogen-bonded (left, 2-H-bonded MQ) and stacked (right, 1-H-bonded MQ) conformations. The H-bond with Thr-135 (shown in pink) does not form in all simulations, and the residue is not fully conserved.*

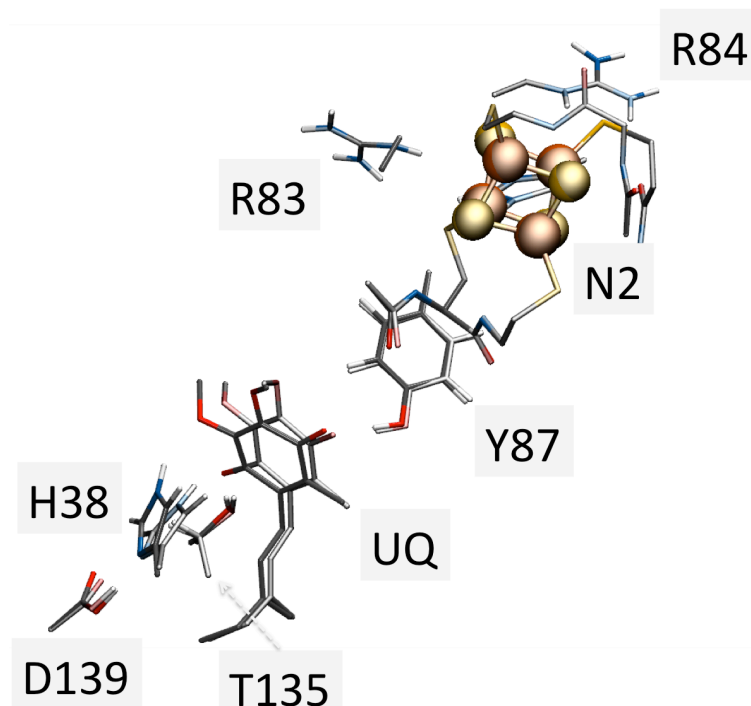

Figure S4. Comparison of the two  $Q$ -binding models obtained from  $QM$ -cluster models, with hydrogen-bonded and stacked conformations shown in full and pastel colors, respectively. DFT optimizations were performed with  $C\beta$  atoms kept fixed.

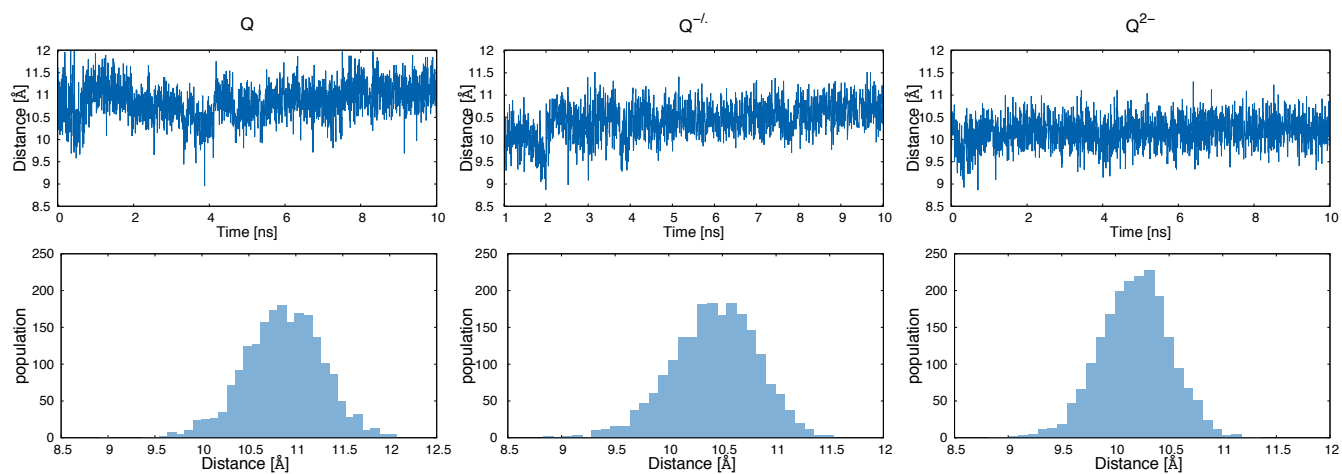

Figure S5. Comparison of distances between  $UQ$  ( $O_2$ ) and  $N_2$  ( $Fe$  closest to  $UQ$ ) from 10 ns classical MD trajectories of  $UQ$  in the  $Q$  (neutral),  $Q^{\bullet-}$  (semiquinone), and  $Q^{2-}$  (doubly reduced) states.

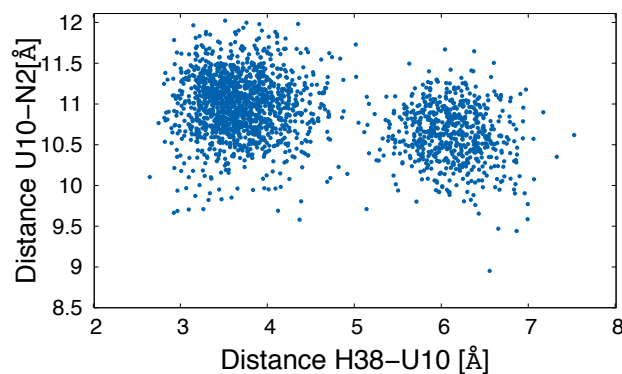

**Figure S6.** Correlation between the N2/Q and Q/His-38 distances obtained from a 10 ns simulation of the oxidized UQ in complex I. The UQ adopts both stacked conformation (N2-Q distance of 11 Å; H38-Q distance of 3.5 Å) or the hydrogen-bonded conformations (N2-Q distance of 10.5 Å; H38-Q distance of 6 Å).

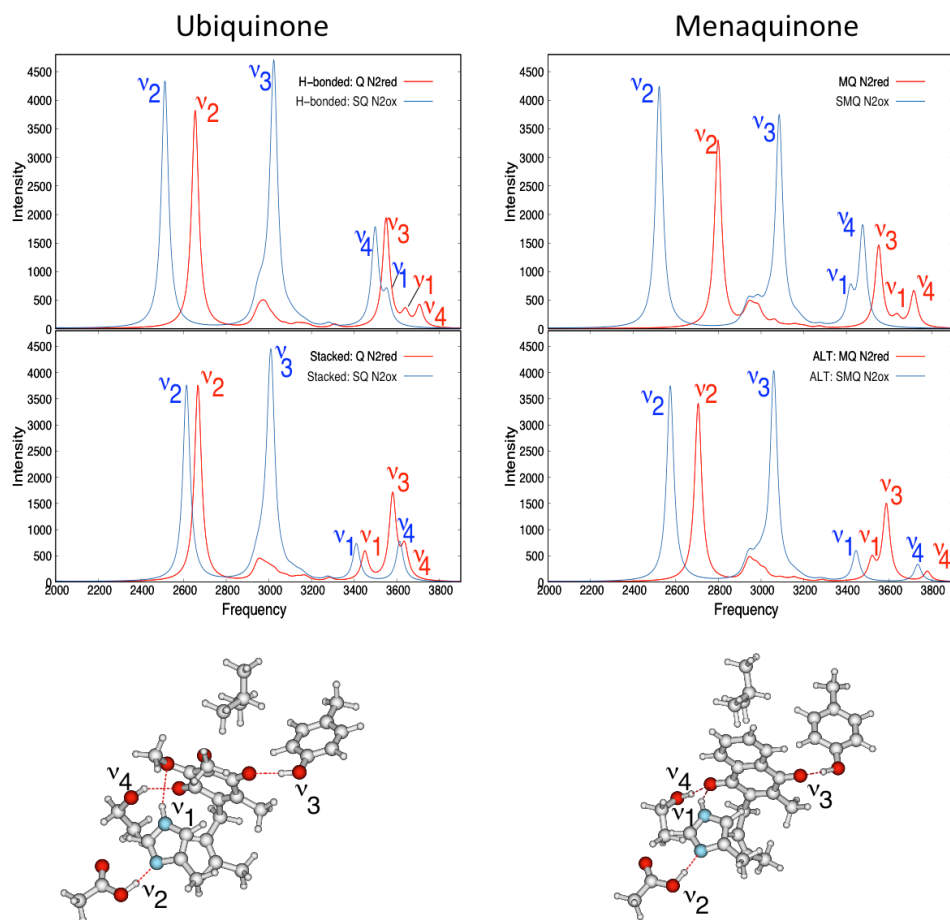

**Figure S7.** IR spectra calculated for UQ DFT-models (left) and MQ DFT-models (right) in the hydrogen-bonded (top) and stacked (bottom) conformations in the oxidized (UQ) and semiquinone ( $Q^{\cdot-}$ ) states. The bottom figure indicates the normal modes coupled to the IR-transition. The spectra were calculated at the B3LYP-D3/def2-SVP/ $\epsilon=4$  level with no scaling of frequencies.

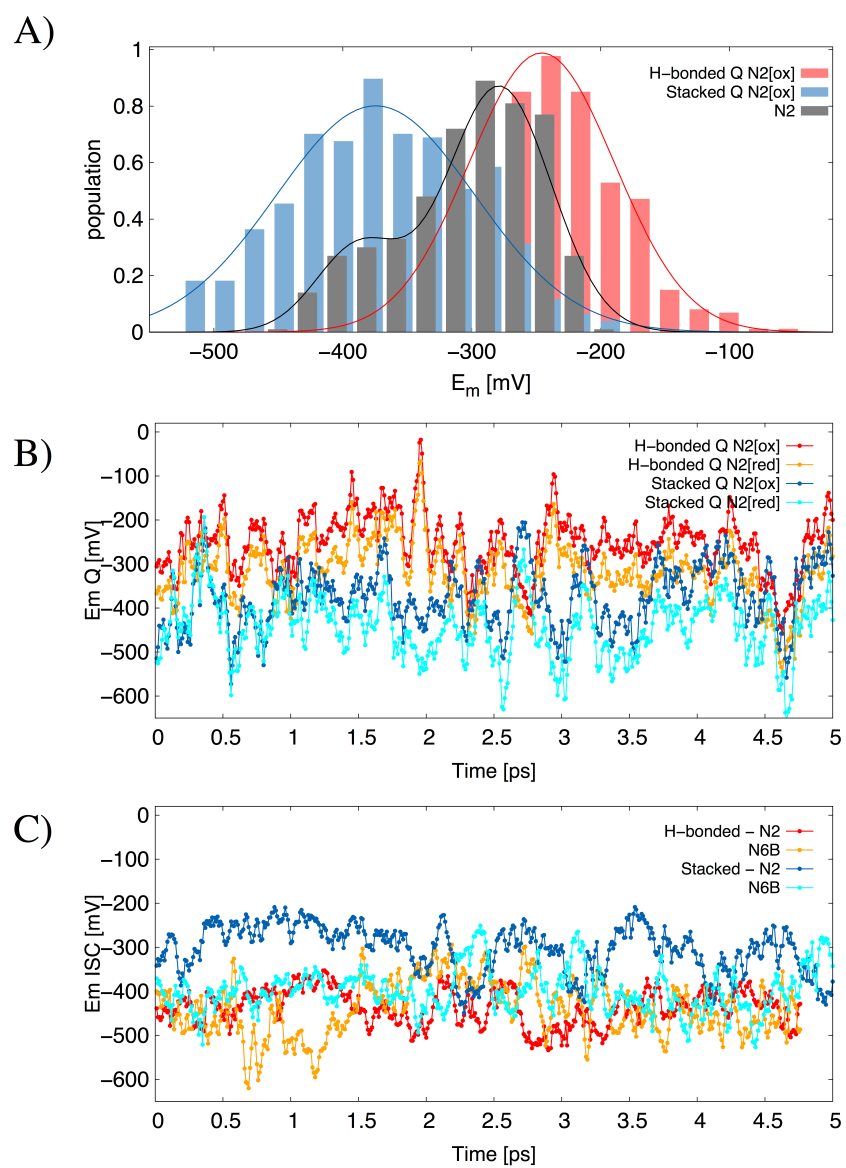

**Figure S8.** Redox potential computed from 5 ps QM/MM MD trajectories for the hydrogen-bonded and stacked systems. **A)** Histogram comparison of  $Q[ox]$  in the hydrogen-bonded and stacked conformation relative to the redox potential of  $N2$ . **B)** The  $E_m$  for the  $Q/SQ$  pair was estimated by fixing the redox state of the ISCs to  $N2[ox]$  or  $N2[red]$ , while  $N6B[ox]$  and  $N6A[ox]$ . **C)** The  $E_m$  values for the two ISCs closest to  $Q$ ,  $N2$  and  $N6B$  were obtained by fixing the redox state to  $Q[ox]$ .



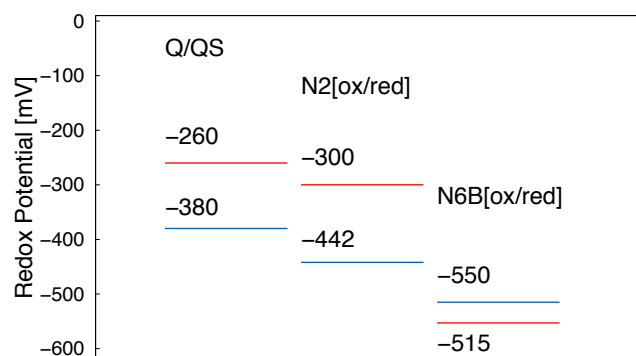

Figure S9. Redox potential of the Q/SQ couple and the N2, N6A, N6B ISCs obtained from Poisson-Boltzmann (PB) electrostatic calculations. The reported values are obtained as a PB average for the hydrogen-bonded (in red) and the stacked (in blue) conformation based on the QM/MM simulations of the combined system.

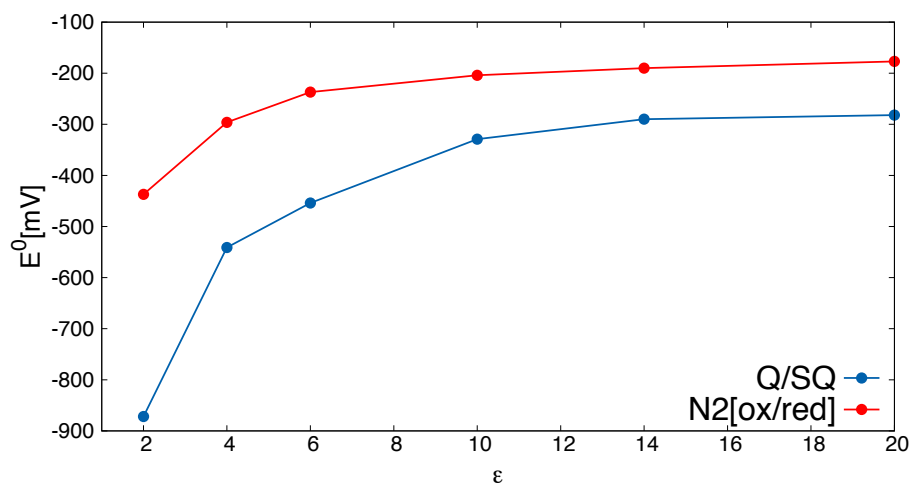

Figure S10. Dependence of the protein dielectric constant on the calculated redox potential,  $E_m$ , for Q/SQ and N2[ox/red]. The protein is model with all explicit atoms using the dielectric constant shown on the x-axis, while water is modeled as a continuum with a high dielectric constant. Cofactors model compound values were calculated from electronic energies values as described in the Methods section.

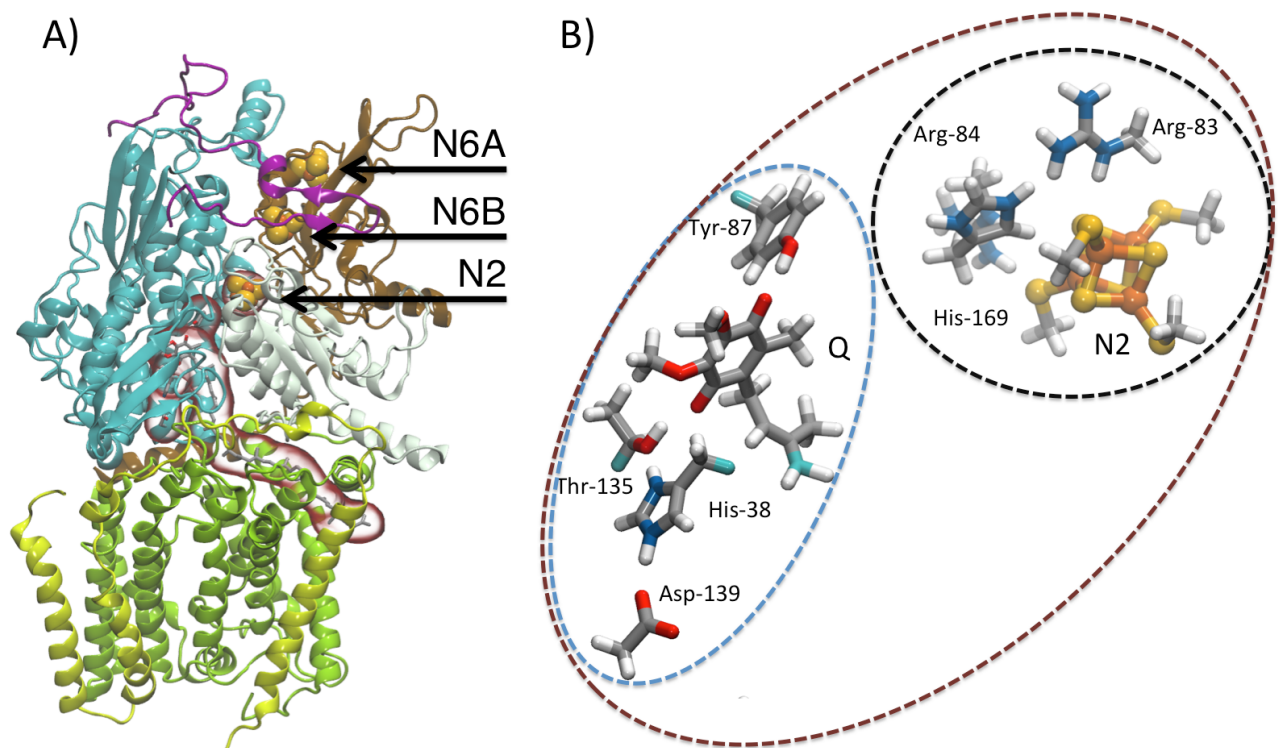

**Figure S11.** Models employed for the QM/MM MD simulations. A) QM/MM model with subunits Nqo4, Nqo5, Nqo6, Nqo7, Nqo8 and Nqo9 of complex I (PDB ID:4HEA). The models comprise the quinone, and ISCs N2, N6A, and N6B B) QM part of the QM/MM models. The N2 subsystem (within dotted black lines), the QM model of the Q subsystem (within dotted blue lines), and the combined N2/Q system (within dotted red lines).

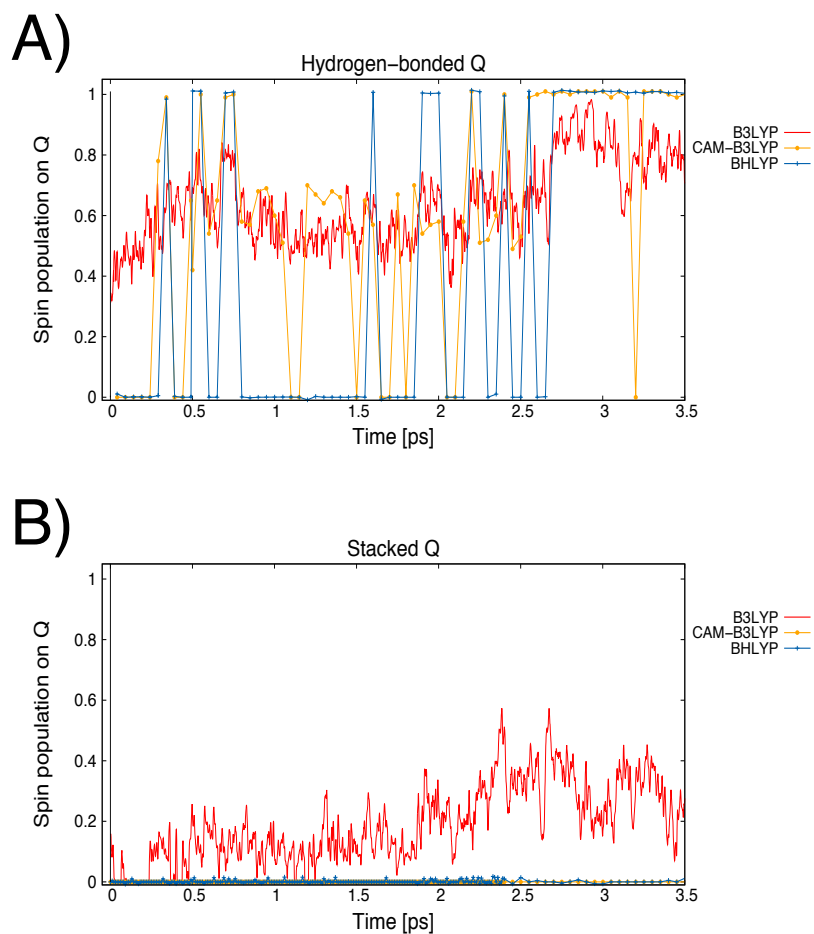

Figure S12. QM/MM dynamics of the electron transfer between N2 and Q in A) the hydrogen-bonded and B) the stacked conformations. Comparison of the total Mulliken spin population on Q obtained at DFT level, by employing different density functionals (B3LYP, CAM-B3LYP, BHLYP).

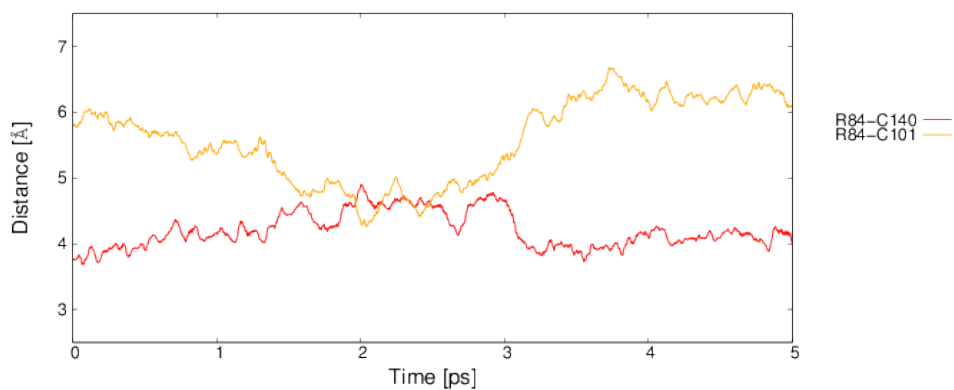

Figure S13. Dynamics of Arg-84 near the N2/N6B centers upon electron transfer in the hydrogen-bonded Q configuration. The electron transfer event that takes place between 1.5 - 3 ps (see Figure 3, main text) and leads to a structural reorganization of Arg-84, which makes a transient contact with Cys-101 of the N6B center. After the electron transfer, the initial contact with Cys-140 of the N2 center is restored.

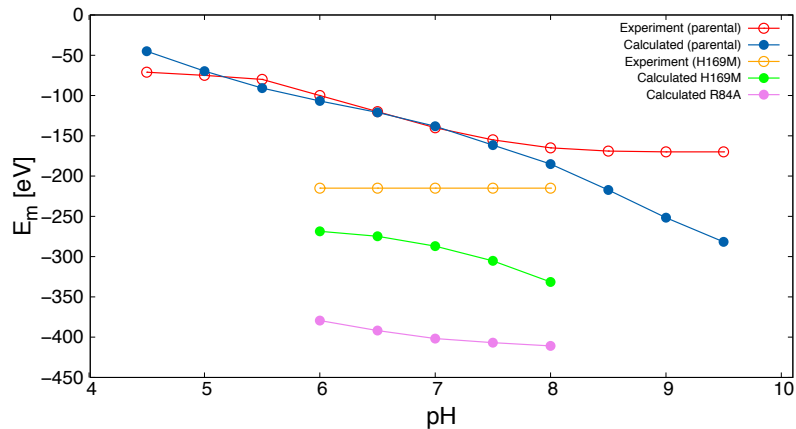

Figure S14. Comparison of the calculated pH dependent redox potential for N2 for the wild type structure, and for the H169M and R84A mutations in subunit Nqo4. The calculated and measured values at pH=7 were set equal. Experimental data obtained from.<sup>1</sup>

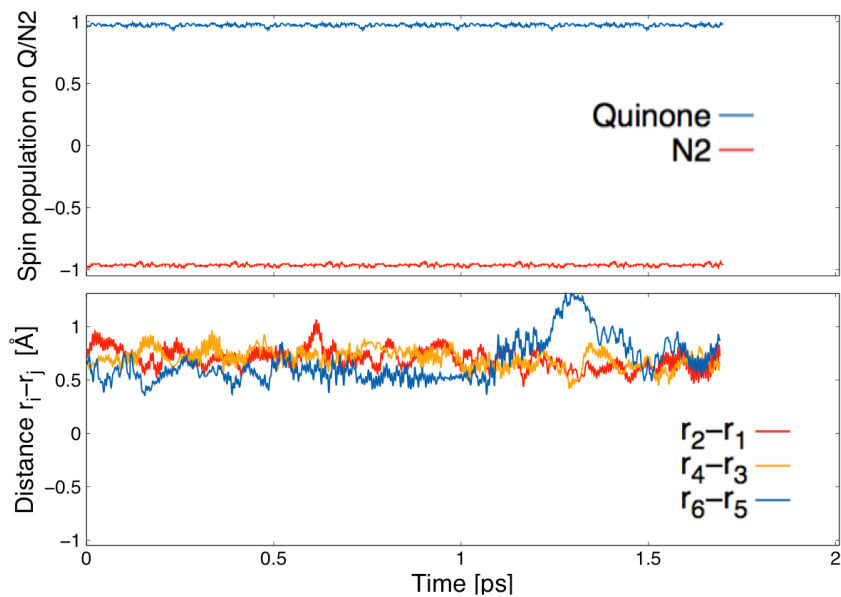

Figure S15. QM/MM dynamics of the second electron transfer from N2 to SQ with protonated His-169. The top figure shows that the electron localizes to N2 and SQ (see Figure 4 of the main text). The bottom figure shows that no proton transfer is observed between Y87 and SQ (red), H38 and SQ (orange) or D139 and H38 (blue).

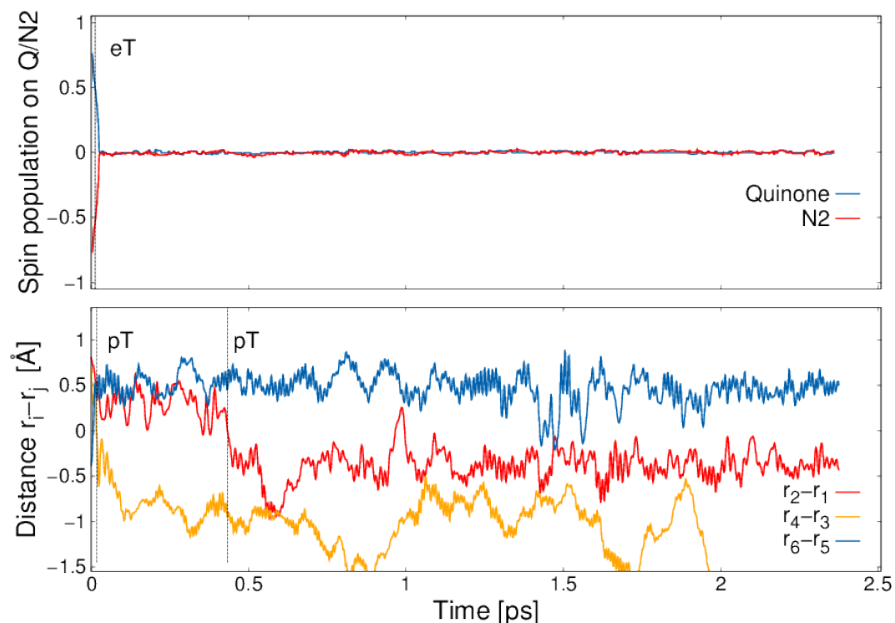

Figure S16. QM/MM dynamics of the second electron transfer from N2 to SQ upon deuteration of His-169 (N $\delta$  protonated).

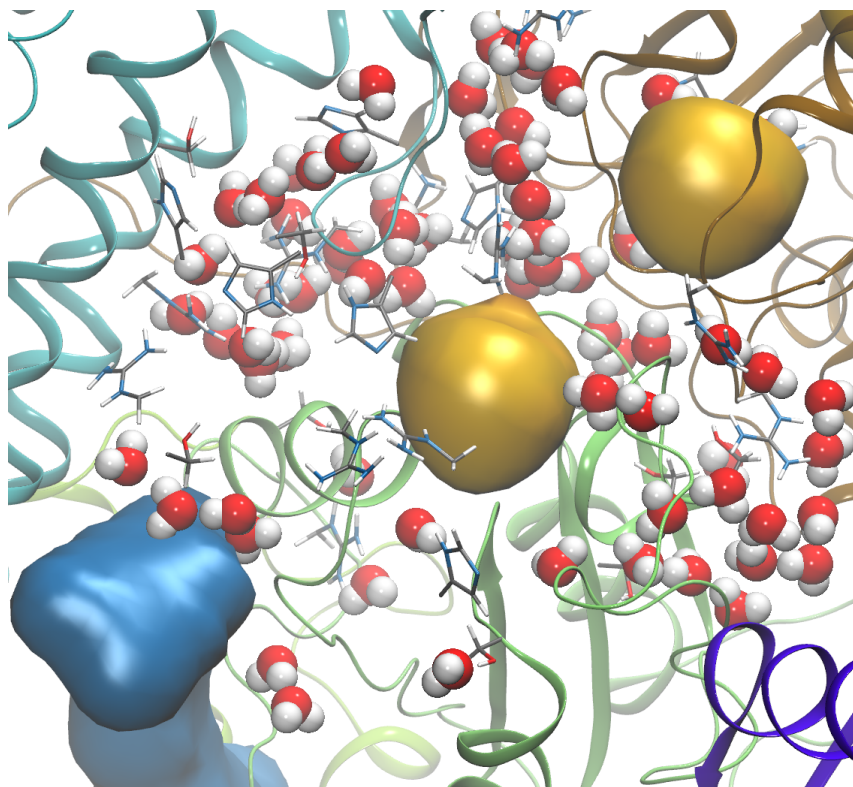

Figure S17. Water molecules surrounding Q and the ISC after 100 ns classical MD simulations of complex I. The blue surface represents the Q while N2 and N6B are shown as yellow surfaces. Several histidine and serine residues surround the cofactors, and could help in providing water wires to the bulk solvent from the hydrophilic domain of complex I. Data from Ref.<sup>2</sup>

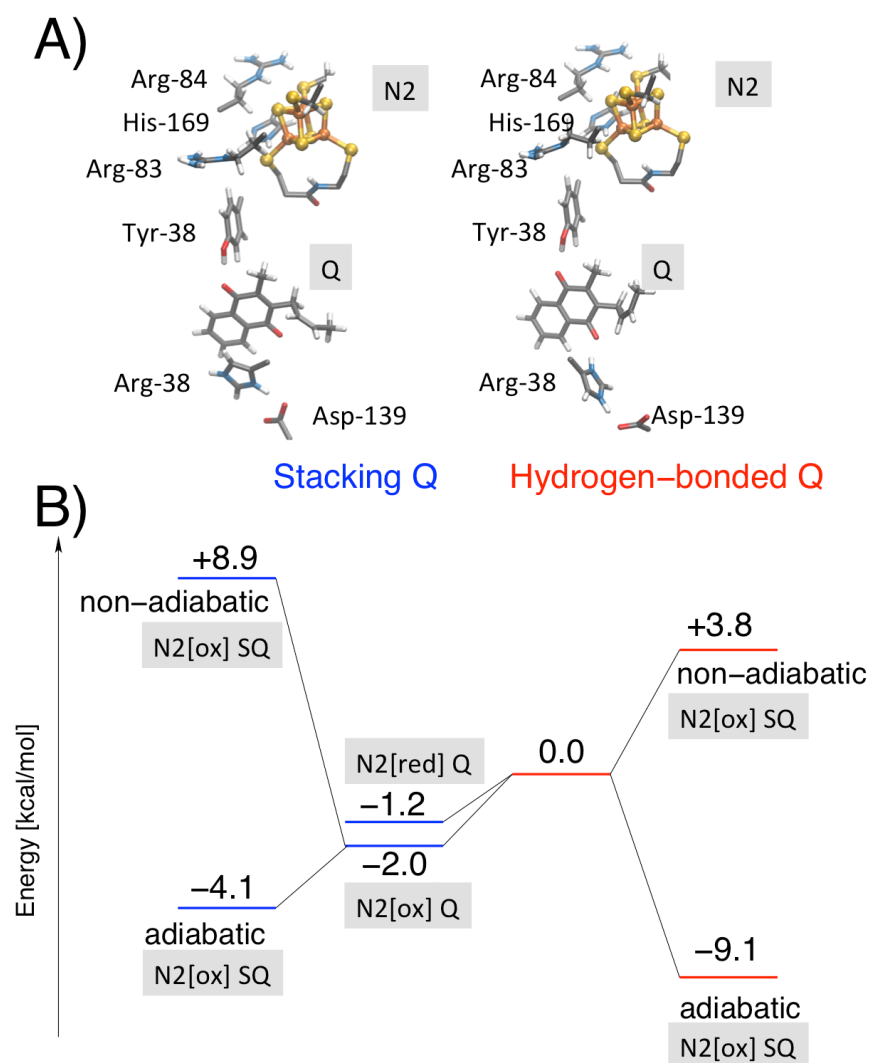

**Figure S18.** *A) Structure and B) B3LYP-D3/def2-TZVPP/ $\epsilon=4$  energetics (in kcal mol<sup>-1</sup>) of hydrogen-bonded (right) and stacked (left) binding modes of menaquinone (MQ) in complex I. Q and SQ refer to oxidized and semiquinone species, while N2[ox] and N2[red] refer to oxidized (2Fe[II]2Fe[III]) and reduced (3Fe[II]1Fe[III]) states of N2, respectively. Non-adiabatic and adiabatic electron transfer energetics are calculated by relaxing the initial electron donor state (N2/Q), or by relaxing both the initial (N2[red]/Q) and final (N2[ox]/SQ) states, respectively.*

**Table S1. Energetics of Q-binding and electron transfer between N2 and UQ at the DFT B3LYP-D3/def2-TZVPP/ $\epsilon=4$  and TPSSH-D3/def2-TZVPP/ $\epsilon=4$  levels (in parenthesis). Q and SQ refer to oxidized and semiquinone states, respectively; N2[ox] and N2[red] refer to oxidized (2Fe[II]2Fe[III]) and reduced (3Fe[II]1Fe[III]) states of N2, respectively. Non-adiabatic and adiabatic electron transfer energetics are calculated by relaxing the initial electron donor state (N2/Q), or by relaxing both the initial (N2[red]/Q) and final (N2[ox]/SQ) states, respectively.**

| State/System   |               | H-bonded<br>(kcal·mol <sup>-1</sup> ) | Stacked<br>(kcal·mol <sup>-1</sup> ) |                                     |
|----------------|---------------|---------------------------------------|--------------------------------------|-------------------------------------|
| Q/N2[ox]       |               | 0.0 (0.0)                             | -2.0 (-2.0)                          |                                     |
| Q/N2[red]      |               | 0.0 (0.0)                             | -3.0 (-2.9)                          |                                     |
| SQ/N2[ox]      |               | 0.0 (0.0)                             | +1.9 (2.2)                           |                                     |
| Q/N2[red]      | non-adiabatic | +5.2 (2.5)                            | +11.2 (8.6)                          |                                     |
| SQ/N2[ox]      | adiabatic     | -8.5 (-13.6)                          | -3.6 (-8.4)                          |                                     |
|                |               | $E_m$ (mV)                            | $E_m$ (mV)                           | <i>Exp.</i> $E_m$ (mV) <sup>c</sup> |
| N2[ox]/N2[red] |               |                                       | -34 <sup>a</sup>                     | -50... -150 <sup>3,4</sup>          |
| N4[ox]/N4[red] |               |                                       | -250 <sup>a</sup>                    | -250 <sup>3,4</sup>                 |
| Q/SQ           |               | 0 <sup>b</sup>                        | -168 <sup>b</sup>                    | < -300 <sup>5</sup>                 |

<sup>a</sup> Electron affinity of N4 set to the experimental value, and the electron affinity N2 value calculated based on the shifts.

<sup>b</sup> Relative shift of the stacked conformation with respect to the hydrogen-bonded conformation.

<sup>c</sup> Experimental redox potentials of UQ and N2 are reported from *E. coli* and due to sequence similarity, their relative shifts can be expected to be similar to *T. thermophilus*, whose  $E_m$  values have not been determined.<sup>6</sup>

**Table S2. Energetics of MQ-binding and electron transfer between N2 and MQ at the DFT B3LYP-D3/def2-TZVPP/ $\epsilon=4$ . Q and SQ refer to oxidized and semiquinone states, respectively; N2[ox] and N2[red] refer to oxidized (2Fe[II]2Fe[III]) and reduced (3Fe[II]1Fe[III]) states of N2, respectively. Non-adiabatic and adiabatic electron transfer energetics are calculated by relaxing the initial electron donor state (N2/Q), or by relaxing both the initial (N2[red]/Q) and final (N2[ox]/SQ) states, respectively.**

| State/System |               | H-bonded<br>(kcal mol <sup>-1</sup> ) | Stacked<br>(kcalmol <sup>-1</sup> ) |
|--------------|---------------|---------------------------------------|-------------------------------------|
| MQ/N2[ox]    |               | 0.0                                   | -1.4                                |
| MQ/N2[red]   |               | 0.0                                   | -1.2                                |
| SQ/N2[ox]    |               | 0.0                                   | +5.8                                |
| Q/N2[red]    | non-adiabatic | +3.8                                  | +10.1                               |
| SQ/N2[ox]    | adiabatic     | -9.1                                  | -2.1                                |

**Table S3. Redox state-dependence of the pK<sub>a</sub> of His-169. The table shows the pK<sub>a</sub> values of His-169 obtained by PB electrostatics of the hydrogen-bonded and stacked conformations of Q, while maintaining the redox state of the N2 cluster fixed to the oxidized (N2[ox]) or reduced (N2[red]) state, respectively.**

| State/System    | H-bonded<br>(pK <sub>a</sub> units) | Stacked<br>(pK <sub>a</sub> units) |
|-----------------|-------------------------------------|------------------------------------|
| Q/SQ w. N2[ox]  | 13.0                                | 6.8                                |
| Q/SQ w. N2[red] | 48.0                                | 22.3                               |

**Table S4. Comparison of redox potentials calculated for a large ( $E_m^1$ ) and small ( $E_m^2$ ) complex I setups. Coordinates were obtained from a 1 ns relaxation of all subunits of complex I crystal structure while UQ was modelled in the hydrogen-bonded conformation. Ca atoms were fixed. FMN, N1B, N4, N5, N6A, N6B, N2 and quinone (UQ) were modelled as titratable redox groups. N1A and N3 were fixed in the reduced state, while N7 and FMN were fixed in the oxidized state. Lys, Arg, His, Glu, Asp, Tyr and Cys were considered as titratable residues, and all other protein atoms were treated explicitly with atomic partial charges in a low dielectric constant, while water was treated as a continuum with high dielectric constant. We considered nine (five) conformations for the large (small) system prepared with different alternated oxidation states of the cofactors by optimizing only hydrogen-atom positions. Redox potentials are reported as Poisson-Boltzmann average of these conformations. The intrinsic error of these calculations ranges from ca. 60 mV for organic compounds<sup>7</sup> to ca. 200 mV for ISC.<sup>8</sup>**

|       |      | Ubiquinone               |                          |                            |
|-------|------|--------------------------|--------------------------|----------------------------|
|       |      | Large setup $E_m^1$ [mV] | Small setup $E_m^2$ [mV] | $\Delta E_m^{2-1}$<br>[mV] |
| UQ/SQ | -290 | -337                     | +47                      |                            |
| N2    | -546 | -563                     | +17                      |                            |
| N6B   | -447 | -445                     | -2                       |                            |
| N6A   | -555 | -452                     | -103                     |                            |
| N5    | -187 |                          |                          |                            |
| N4    | -625 |                          |                          |                            |
| N1B   | -626 |                          |                          |                            |
| N3    | -466 |                          |                          |                            |



**Table S5. Calculated redox potentials for quinone (Q/SQ) model compounds [ $E_m$  mV vs. SHE] used in PBE calculations in the protein.  $E_m$  values for UQ and MQ were calculated within the protein environment. Conversion from SCE electrode to SHE values were obtained by adding + 241 mV to the SCE potentials.<sup>10</sup>**

|               | Experiment <sup>9</sup> |            | Calculated <sup>a</sup> |                    |                        |
|---------------|-------------------------|------------|-------------------------|--------------------|------------------------|
|               | DMF<br>SCE              | DMF<br>SHE | DMF<br>SHE              | water<br>cal+shift | Protein                |
| Benzoquinone  | -401                    | -157       | -150                    | 30                 | -                      |
| Plastoquinone | -640                    | -396       | -365                    | -178               | -                      |
| Ubiquinone    | -611                    | -367       | -367                    | -188               | -260/-380 <sup>b</sup> |
| Menaquinone   | -709                    | -465       | -414                    | -241               | -230/-690 <sup>b</sup> |
|               | RMSD                    |            | 57 mV                   |                    |                        |

<sup>a</sup> B3LYP/def2-TZVP (DMF  $\epsilon=36.7$ , 2.54 Å probe radius and water  $\epsilon=80$ , 1.4 Å probe radius).

Values set to match experiment/calculated ubiquinone  $E_m$ .

<sup>b</sup> Calculated redox potentials for complex I with quinone (UQ/MQ) considering subunits Nqo4, Nqo5, Nqo6, Nqo7, Nqo8 and Nqo9. Coordinates were obtained from a 1 ns relaxation with all subunits of complex I from the crystal structure with UQ/MQ modeled in both, hydrogen-bonded and stacked conformations while fixing C $\beta$  atoms. N6A, N6B, N2 and UQ/MQ were modeled as titratable redox groups and Lys, Arg, His, Glu, Asp, Tyr and Cys were considered as titratable residues, and all other protein atoms were treated explicitly with atomic partial charges in a low dielectric constant, while water was treated as a continuum with high dielectric constant. We considered nine conformations for a system prepared with different alternated oxidation states of the cofactors by optimizing only hydrogen-atom positions. Redox potentials are reported as Poisson-Boltzmann average of these conformations.

**Tables S6. Coordinates of the N2 cluster and ubiquinone (UQ)/menaquinone (MQ), in different oxidation states, optimized at the B3LYP-D3 level, employing the def2-TZVP (S, Fe) and def2-SVP (H, C, N, O) basis sets, using the COSMO solvation model with  $\epsilon=4$ , along with SCF energies using the def2-TZVPP basis set. Standard XYZ format in Ångström units, energies [E] in Hartree. Atoms marked with an asterisk (\*) were kept frozen during the geometry optimization procedure.**

**Table S6.1 Ubiquinone stacked, Q N2[red]**

```

211
# E=-12375.75482706 Hartree
C 70.47811 -25.30041 32.97933
C 71.51341 -24.48514 32.26029
C 72.80006 -24.17905 32.92676
C 72.96296 -24.42744 34.25865
C 71.88964 -25.19043 34.99028
C 70.64562 -25.60795 34.29040
C 69.29049 -25.65781 32.14337
C 74.30876 -24.11593 31.05749
C 75.08611 -23.30652 34.62175
C 69.64704 -26.38842 35.12094
C 69.92813 -27.87449 35.08511
C 69.11973 -28.84101 34.62532
C 67.73926 -28.70494 34.04961
O 71.29694 -24.07345 31.12864
O 73.72778 -23.48196 32.20902
O 73.98048 -24.11357 35.05350
O 72.07109 -25.45108 36.17374
C* 67.23998 -22.83799 33.62699
C 69.71422 -22.24746 34.16432
C 68.51039 -22.05982 33.51281
N 70.56897 -21.27840 33.68082
N 68.64108 -20.98968 32.65039
C 69.88320 -20.55191 32.77323
C* 76.92097 -28.86699 39.93099
C 75.57329 -28.54271 39.34205
C 75.40518 -27.45860 38.46847
C 74.15470 -27.12586 37.94179
C 73.02566 -27.88974 38.28499
O 71.78085 -27.60774 37.83320
C 74.43747 -29.30834 39.65684
C 73.18124 -28.99460 39.14027
C* 77.29698 -23.20700 40.02999
C* 76.39197 -23.68199 38.88999
C* 75.38298 -22.57599 38.53599
C* 77.16697 -24.08299 37.64199
C 73.12438 -20.02228 31.84349
O 73.28319 -20.89944 32.96191
C* 72.55898 -20.73499 30.62099
C* 67.48798 -17.76800 29.31099
C 68.16611 -18.68038 30.30415
O 67.32773 -19.53616 30.86211
O 69.35905 -18.61354 30.55690
H 68.53380 -26.22653 32.69278
H 69.61243 -26.25310 31.27306
H 68.83689 -24.74083 31.73505
H 75.07886 -23.42585 30.68861
H 73.55156 -24.28226 30.27955
H 74.77776 -25.07014 31.34825
H 75.71512 -23.18426 35.50821
H 74.74482 -22.32159 34.27714
H 75.65623 -23.80826 33.82735
H 69.71513 -26.03512 36.16243
H 68.62827 -26.16634 34.77933
H 70.90306 -28.16502 35.48966
H 69.50220 -29.86876 34.67461
H 67.33549 -27.68368 34.11639
H 67.03470 -29.37651 34.57015
H 67.72697 -29.00588 32.98674
H 66.40711 -22.20198 33.97095
H 67.35162 -23.67025 34.33837
H 66.94703 -23.25720 32.65006
H 70.01190 -22.96510 34.92195
H 71.58681 -21.19443 33.79979
H 67.79676 -20.13659 31.55322
H 70.28920 -19.72418 32.19825
H 77.63512 -28.04490 39.76964

```

|    |          |           |          |
|----|----------|-----------|----------|
| H  | 77.37544 | -29.76954 | 39.49500 |
| H  | 76.84092 | -29.01120 | 41.02240 |
| H  | 76.27094 | -26.84966 | 38.19327 |
| H  | 74.04599 | -26.27025 | 37.27115 |
| H  | 71.79507 | -26.79771 | 37.28427 |
| H  | 74.53363 | -30.16992 | 40.32569 |
| H  | 72.30005 | -29.58878 | 39.39383 |
| H  | 78.02001 | -23.98605 | 40.32625 |
| H  | 76.70657 | -22.93647 | 40.92104 |
| H  | 77.87471 | -22.31534 | 39.72715 |
| H  | 75.82724 | -24.56495 | 39.24269 |
| H  | 75.90723 | -21.67729 | 38.16587 |
| H  | 74.78388 | -22.27744 | 39.41231 |
| H  | 74.68244 | -22.90605 | 37.75020 |
| H  | 77.66200 | -23.21026 | 37.18093 |
| H  | 76.50147 | -24.53641 | 36.89136 |
| H  | 77.95241 | -24.82444 | 37.86899 |
| H  | 72.45294 | -19.21147 | 32.17052 |
| H  | 74.09247 | -19.54654 | 31.59335 |
| H  | 73.57641 | -21.76364 | 32.61130 |
| H  | 71.66293 | -21.31894 | 30.87573 |
| H  | 73.29744 | -21.43270 | 30.19347 |
| H  | 72.28556 | -20.00414 | 29.84367 |
| H  | 68.22318 | -17.10009 | 28.84504 |
| H  | 66.71525 | -17.17570 | 29.82684 |
| H  | 66.97610 | -18.36664 | 28.54112 |
| C* | 77.18100 | -32.61600 | 44.93300 |
| C* | 77.38500 | -34.14300 | 44.93500 |
| C* | 78.86799 | -34.55900 | 44.69100 |
| C  | 79.03184 | -36.07945 | 44.79388 |
| N  | 80.33217 | -36.53247 | 44.31381 |
| C  | 81.48238 | -36.42027 | 44.98183 |
| N  | 81.48935 | -36.19745 | 46.30890 |
| N  | 82.63283 | -36.51890 | 44.30986 |
| C* | 75.72200 | -32.17300 | 44.73700 |
| O  | 74.77397 | -32.92133 | 44.65263 |
| C* | 81.64500 | -32.53700 | 42.95900 |
| N  | 79.53125 | -31.21432 | 42.41487 |
| C  | 80.31381 | -32.35701 | 42.33010 |
| C  | 78.32512 | -31.44864 | 41.87794 |
| N  | 78.31595 | -32.71011 | 41.45230 |
| C  | 79.53510 | -33.28581 | 41.69598 |
| C* | 76.29600 | -31.58300 | 37.64700 |
| C* | 76.57100 | -32.33800 | 38.96800 |
| S  | 75.39499 | -33.61042 | 39.52035 |
| C* | 77.25800 | -32.00400 | 36.55700 |
| O  | 77.90270 | -31.13843 | 35.95526 |
| N* | 77.36100 | -33.31100 | 36.20100 |
| C* | 78.07701 | -33.82500 | 35.01000 |
| C* | 77.92100 | -35.37700 | 34.73500 |
| S  | 79.19925 | -36.53253 | 35.38604 |
| C* | 71.58700 | -37.27400 | 39.17500 |
| C* | 72.87900 | -37.29900 | 40.00900 |
| C  | 72.83522 | -36.62366 | 41.36673 |
| N  | 72.87115 | -35.16431 | 41.23318 |
| C  | 73.04336 | -34.33565 | 42.26184 |
| N  | 72.86817 | -34.76948 | 43.51655 |
| N  | 73.35994 | -33.04822 | 42.03214 |
| C* | 79.04600 | -41.17200 | 35.58000 |
| O  | 78.32214 | -41.96033 | 34.98257 |
| N* | 79.48900 | -41.34100 | 36.83400 |
| C* | 79.20900 | -42.52700 | 37.59000 |
| C* | 80.08700 | -42.37100 | 38.83000 |
| C* | 77.70900 | -42.67700 | 37.91600 |
| O  | 77.17259 | -43.77572 | 37.76703 |
| N* | 77.03399 | -41.62000 | 38.40700 |
| C* | 75.58700 | -41.60000 | 38.63700 |
| C* | 75.12400 | -40.17100 | 39.01400 |
| S  | 75.63144 | -39.62866 | 40.69227 |
| C* | 83.75900 | -40.36900 | 37.05500 |
| C* | 82.81000 | -39.35800 | 37.59000 |
| O  | 81.62641 | -39.31751 | 37.25122 |
| N* | 83.37500 | -38.47700 | 38.40900 |
| C* | 82.72300 | -37.30300 | 38.94400 |
| C* | 82.25300 | -37.60100 | 40.39600 |
| S  | 81.47050 | -36.21041 | 41.26910 |

|    |          |           |          |
|----|----------|-----------|----------|
| Fe | 76.98106 | -37.96191 | 39.90386 |
| Fe | 78.44995 | -36.93652 | 37.51450 |
| Fe | 76.90676 | -35.38740 | 39.45690 |
| Fe | 79.33069 | -36.51577 | 40.37500 |
| S  | 79.00923 | -34.85946 | 38.74600 |
| S  | 77.29686 | -36.32847 | 41.59982 |
| S  | 79.06759 | -38.58075 | 39.22281 |
| S  | 76.11352 | -36.95421 | 37.94201 |
| H  | 77.53548 | -32.13726 | 45.86551 |
| H  | 77.75646 | -32.11961 | 44.13511 |
| H  | 77.02388 | -34.55789 | 45.89084 |
| H  | 76.76737 | -34.59486 | 44.14083 |
| H  | 79.54161 | -34.05095 | 45.40362 |
| H  | 79.16028 | -34.25676 | 43.68287 |
| H  | 78.85571 | -36.43653 | 45.82264 |
| H  | 78.28228 | -36.57062 | 44.15722 |
| H  | 80.43202 | -36.66402 | 43.29292 |
| H  | 82.36523 | -36.18367 | 46.81734 |
| H  | 80.64778 | -36.34111 | 46.85334 |
| H  | 82.58706 | -36.48817 | 43.28105 |
| H  | 75.57473 | -31.06610 | 44.66231 |
| H  | 73.54656 | -32.46995 | 42.84478 |
| H  | 82.06479 | -33.50141 | 42.63866 |
| H  | 81.55782 | -32.54074 | 44.05866 |
| H  | 82.34928 | -31.73892 | 42.67565 |
| H  | 79.81897 | -30.32380 | 42.81261 |
| H  | 77.51838 | -30.72943 | 41.79303 |
| H  | 77.52026 | -33.20803 | 41.02752 |
| H  | 79.75690 | -34.30286 | 41.40387 |
| H  | 75.25764 | -31.74182 | 37.31252 |
| H  | 76.44223 | -30.50481 | 37.76421 |
| H  | 76.57923 | -31.57425 | 39.75743 |
| H  | 77.57895 | -32.76589 | 38.92719 |
| H  | 76.86587 | -34.00336 | 36.75961 |
| H  | 77.69098 | -33.27628 | 34.13300 |
| H  | 79.14750 | -33.57443 | 35.09131 |
| H  | 77.94156 | -35.49372 | 33.64150 |
| H  | 76.92419 | -35.70516 | 35.07175 |
| H  | 71.73868 | -37.81068 | 38.22577 |
| H  | 71.26932 | -36.24606 | 38.92739 |
| H  | 70.75546 | -37.75983 | 39.71333 |
| H  | 73.72616 | -36.88640 | 39.43436 |
| H  | 73.16787 | -38.34280 | 40.19816 |
| H  | 73.71668 | -36.94544 | 41.94871 |
| H  | 71.92432 | -36.92288 | 41.91708 |
| H  | 72.99890 | -34.77572 | 40.30185 |
| H  | 72.60218 | -35.72838 | 43.70034 |
| H  | 73.27556 | -34.23444 | 44.27744 |
| H  | 73.92319 | -32.87333 | 41.18713 |
| H  | 79.40116 | -40.21572 | 35.12707 |
| H  | 80.14914 | -40.63869 | 37.18277 |
| H  | 79.45405 | -43.43560 | 37.01810 |
| H  | 79.84292 | -41.43586 | 39.35711 |
| H  | 81.14768 | -42.33883 | 38.53528 |
| H  | 79.95125 | -43.21137 | 39.52893 |
| H  | 77.53567 | -40.73803 | 38.51807 |
| H  | 75.31845 | -42.32053 | 39.42824 |
| H  | 75.07273 | -41.92421 | 37.71420 |
| H  | 74.02289 | -40.15867 | 38.97690 |
| H  | 75.46599 | -39.46385 | 38.24703 |
| H  | 83.52744 | -36.52586 | 44.78335 |
| H  | 83.25322 | -41.34247 | 36.96953 |
| H  | 84.05157 | -40.07029 | 36.03429 |
| H  | 84.67196 | -40.48734 | 37.65728 |
| H  | 84.35680 | -38.59633 | 38.62894 |
| H  | 81.84794 | -37.06681 | 38.31985 |
| H  | 83.13267 | -37.92297 | 40.98073 |
| H  | 81.55036 | -38.44281 | 40.35819 |
| H  | 83.41672 | -36.44812 | 38.92381 |

Table S6.2 Ubiquinone stacked, Q N2[ox]

211

# E=-12375.61898974 Hartree

|    |          |           |          |
|----|----------|-----------|----------|
| C  | 70.49998 | -25.31811 | 32.92207 |
| C  | 71.54162 | -24.49956 | 32.21549 |
| C  | 72.81978 | -24.19033 | 32.89733 |
| C  | 72.97177 | -24.45020 | 34.22836 |
| C  | 71.90176 | -25.23562 | 34.93972 |
| C  | 70.65707 | -25.63347 | 34.23248 |
| C  | 69.31159 | -25.66076 | 32.08161 |
| C  | 74.35014 | -24.10359 | 31.04618 |
| C  | 75.07703 | -23.30717 | 34.62469 |
| C  | 69.64351 | -26.40837 | 35.05065 |
| C  | 69.87679 | -27.90071 | 34.97164 |
| C  | 69.02011 | -28.83155 | 34.52558 |
| C  | 67.62228 | -28.64005 | 34.01121 |
| O  | 71.33631 | -24.08781 | 31.08222 |
| O  | 73.74984 | -23.48202 | 32.19458 |
| O  | 73.98044 | -24.13740 | 35.03548 |
| O  | 72.08798 | -25.53251 | 36.11454 |
| C* | 67.23998 | -22.83799 | 33.62699 |
| C  | 69.72296 | -22.26706 | 34.14577 |
| C  | 68.51363 | -22.06590 | 33.50869 |
| N  | 70.57623 | -21.29345 | 33.66835 |
| N  | 68.63973 | -20.98440 | 32.65997 |
| C  | 69.88407 | -20.55208 | 32.77763 |
| C* | 76.92097 | -28.86699 | 39.93099 |
| C  | 75.58073 | -28.57072 | 39.31128 |
| C  | 75.40791 | -27.48600 | 38.43919 |
| C  | 74.16479 | -27.18583 | 37.87772 |
| C  | 73.04784 | -27.98484 | 38.18084 |
| O  | 71.81194 | -27.73919 | 37.69103 |
| C  | 74.45692 | -29.36639 | 39.59281 |
| C  | 73.20871 | -29.08761 | 39.03863 |
| C* | 77.29698 | -23.20700 | 40.02999 |
| C* | 76.39197 | -23.68199 | 38.88999 |
| C* | 75.38298 | -22.57599 | 38.53599 |
| C* | 77.16697 | -24.08299 | 37.64199 |
| C  | 73.12757 | -20.02482 | 31.84323 |
| O  | 73.28936 | -20.90561 | 32.95907 |
| C* | 72.55898 | -20.73499 | 30.62099 |
| C* | 67.48798 | -17.76800 | 29.31099 |
| C  | 68.16275 | -18.67277 | 30.31316 |
| O  | 67.32346 | -19.52824 | 30.87096 |
| O  | 69.35393 | -18.60209 | 30.57310 |
| H  | 68.59707 | -26.31137 | 32.59563 |
| H  | 69.63857 | -26.15500 | 31.15316 |
| H  | 68.80271 | -24.73374 | 31.76975 |
| H  | 75.11089 | -23.39959 | 30.68449 |
| H  | 73.60204 | -24.28096 | 30.26200 |
| H  | 74.83331 | -25.05011 | 31.33902 |
| H  | 75.69455 | -23.18454 | 35.51909 |
| H  | 74.72349 | -22.32398 | 34.28772 |
| H  | 75.66373 | -23.78987 | 33.83051 |
| H  | 69.73052 | -26.08587 | 36.10070 |
| H  | 68.62897 | -26.14520 | 34.72528 |
| H  | 70.85811 | -28.22964 | 35.32960 |
| H  | 69.37111 | -29.87161 | 34.53701 |
| H  | 67.26103 | -27.60486 | 34.10074 |
| H  | 66.91591 | -29.28785 | 34.55893 |
| H  | 67.55208 | -28.93370 | 32.94858 |
| H  | 66.41628 | -22.20218 | 33.99268 |
| H  | 67.35491 | -23.68236 | 34.32347 |
| H  | 66.93008 | -23.23849 | 32.64738 |
| H  | 70.02514 | -22.99601 | 34.89076 |
| H  | 71.59509 | -21.21192 | 33.78167 |
| H  | 67.79146 | -20.12503 | 31.56411 |
| H  | 70.28757 | -19.71822 | 32.20951 |
| H  | 77.60295 | -28.00780 | 39.83962 |
| H  | 77.43297 | -29.72633 | 39.46887 |
| H  | 76.80540 | -29.06875 | 41.00929 |
| H  | 76.26303 | -26.84961 | 38.19419 |
| H  | 74.05053 | -26.32735 | 37.21196 |
| H  | 71.81400 | -26.91639 | 37.15918 |
| H  | 74.55663 | -30.22366 | 40.26726 |

|    |          |           |          |
|----|----------|-----------|----------|
| H  | 72.33604 | -29.70451 | 39.26624 |
| H  | 78.02075 | -23.98561 | 40.32593 |
| H  | 76.70670 | -22.93674 | 40.92113 |
| H  | 77.87412 | -22.31507 | 39.72724 |
| H  | 75.82701 | -24.56492 | 39.24321 |
| H  | 75.90722 | -21.67821 | 38.16400 |
| H  | 74.78548 | -22.27583 | 39.41276 |
| H  | 74.68105 | -22.90662 | 37.75176 |
| H  | 77.66203 | -23.21036 | 37.18111 |
| H  | 76.50168 | -24.53591 | 36.89080 |
| H  | 77.95275 | -24.82431 | 37.86901 |
| H  | 72.45710 | -19.21511 | 32.17455 |
| H  | 74.09517 | -19.54880 | 31.59227 |
| H  | 73.58947 | -21.76583 | 32.60509 |
| H  | 71.65910 | -21.31335 | 30.87493 |
| H  | 73.29360 | -21.43680 | 30.19368 |
| H  | 72.29014 | -20.00265 | 29.84348 |
| H  | 68.22397 | -17.10024 | 28.84612 |
| H  | 66.71009 | -17.17536 | 29.81859 |
| H  | 66.98298 | -18.37249 | 28.54115 |
| C* | 77.18100 | -32.61600 | 44.93300 |
| C* | 77.38500 | -34.14300 | 44.93500 |
| C* | 78.86799 | -34.55900 | 44.69100 |
| C  | 79.05467 | -36.07404 | 44.82532 |
| N  | 80.36582 | -36.51530 | 44.35990 |
| C  | 81.51160 | -36.38436 | 45.03509 |
| N  | 81.50979 | -36.14368 | 46.35570 |
| N  | 82.66854 | -36.48355 | 44.37270 |
| C* | 75.72200 | -32.17300 | 44.73700 |
| O  | 74.77134 | -32.91892 | 44.66110 |
| C* | 81.64500 | -32.53700 | 42.95900 |
| N  | 79.55849 | -31.16463 | 42.47315 |
| C  | 80.31329 | -32.32050 | 42.34390 |
| C  | 78.34501 | -31.34823 | 41.93832 |
| N  | 78.30080 | -32.59386 | 41.46782 |
| C  | 79.50901 | -33.20912 | 41.68236 |
| C* | 76.29600 | -31.58300 | 37.64700 |
| C* | 76.57100 | -32.33800 | 38.96800 |
| S  | 75.39906 | -33.59912 | 39.57296 |
| C* | 77.25800 | -32.00400 | 36.55700 |
| O  | 77.92527 | -31.14541 | 35.97576 |
| N* | 77.36100 | -33.31100 | 36.20100 |
| C* | 78.07701 | -33.82500 | 35.01000 |
| C* | 77.92100 | -35.37700 | 34.73500 |
| S  | 79.13207 | -36.54610 | 35.48473 |
| C* | 71.58700 | -37.27400 | 39.17500 |
| C* | 72.87900 | -37.29900 | 40.00900 |
| C  | 72.81486 | -36.66297 | 41.38511 |
| N  | 72.80417 | -35.20152 | 41.29471 |
| C  | 73.02661 | -34.39791 | 42.33368 |
| N  | 73.02728 | -34.88814 | 43.57675 |
| N  | 73.22881 | -33.08307 | 42.12866 |
| C* | 79.04600 | -41.17200 | 35.58000 |
| O  | 78.28523 | -41.93564 | 34.99994 |
| N* | 79.48900 | -41.34100 | 36.83400 |
| C* | 79.20900 | -42.52700 | 37.59000 |
| C* | 80.08700 | -42.37100 | 38.83000 |
| C* | 77.70900 | -42.67700 | 37.91600 |
| O  | 77.17420 | -43.77568 | 37.78011 |
| N* | 77.03399 | -41.62000 | 38.40700 |
| C* | 75.58700 | -41.60000 | 38.63700 |
| C* | 75.12400 | -40.17100 | 39.01400 |
| S  | 75.69677 | -39.60993 | 40.66504 |
| C* | 83.75900 | -40.36900 | 37.05500 |
| C* | 82.81000 | -39.35800 | 37.59000 |
| O  | 81.62000 | -39.32160 | 37.26668 |
| N* | 83.37500 | -38.47700 | 38.40900 |
| C* | 82.72300 | -37.30300 | 38.94400 |
| C* | 82.25300 | -37.60100 | 40.39600 |
| S  | 81.46058 | -36.19515 | 41.25233 |
| Fe | 76.99105 | -37.96920 | 39.84957 |
| Fe | 78.45186 | -36.81682 | 37.61657 |
| Fe | 76.90021 | -35.32955 | 39.46950 |
| Fe | 79.33901 | -36.55004 | 40.36317 |
| S  | 79.01079 | -34.85009 | 38.72852 |
| S  | 77.36455 | -36.36888 | 41.54964 |

|   |          |           |          |
|---|----------|-----------|----------|
| S | 79.08775 | -38.51789 | 39.07288 |
| S | 76.16498 | -36.89353 | 37.91234 |
| H | 77.53261 | -32.14054 | 45.86806 |
| H | 77.75923 | -32.11722 | 44.13945 |
| H | 77.02648 | -34.55640 | 45.89212 |
| H | 76.76184 | -34.59693 | 44.14605 |
| H | 79.54005 | -34.03167 | 45.39046 |
| H | 79.15646 | -34.27052 | 43.67620 |
| H | 78.88261 | -36.41154 | 45.86063 |
| H | 78.31408 | -36.59719 | 44.20421 |
| H | 80.47260 | -36.67006 | 43.34687 |
| H | 82.38243 | -36.09464 | 46.86838 |
| H | 80.66601 | -36.27201 | 46.90065 |
| H | 82.64637 | -36.48929 | 43.34961 |
| H | 75.57592 | -31.06727 | 44.65494 |
| H | 73.43625 | -32.50958 | 42.94023 |
| H | 82.05769 | -33.49198 | 42.60441 |
| H | 81.56007 | -32.57797 | 44.05781 |
| H | 82.35351 | -31.73421 | 42.70186 |
| H | 79.87108 | -30.29617 | 42.90175 |
| H | 77.55514 | -30.60685 | 41.88604 |
| H | 77.48160 | -33.04865 | 41.04298 |
| H | 79.70514 | -34.21725 | 41.34595 |
| H | 75.25617 | -31.73537 | 37.31360 |
| H | 76.44486 | -30.50664 | 37.76950 |
| H | 76.58785 | -31.56562 | 39.74875 |
| H | 77.58152 | -32.75503 | 38.92456 |
| H | 76.78230 | -33.98446 | 36.69802 |
| H | 77.68914 | -33.29055 | 34.12544 |
| H | 79.14558 | -33.56931 | 35.08986 |
| H | 78.04087 | -35.51016 | 33.65063 |
| H | 76.89989 | -35.69987 | 34.99168 |
| H | 71.74619 | -37.78230 | 38.21163 |
| H | 71.25047 | -36.24619 | 38.95385 |
| H | 70.76574 | -37.78820 | 39.70150 |
| H | 73.71527 | -36.84620 | 39.44899 |
| H | 73.18309 | -38.34308 | 40.16887 |
| H | 73.70771 | -36.96829 | 41.95780 |
| H | 71.91910 | -37.01341 | 41.93023 |
| H | 72.72925 | -34.77303 | 40.37652 |
| H | 72.77592 | -35.85063 | 43.76260 |
| H | 73.45585 | -34.34648 | 44.32181 |
| H | 73.66055 | -32.81556 | 41.24197 |
| H | 79.43602 | -40.23677 | 35.11132 |
| H | 80.20189 | -40.67634 | 37.15176 |
| H | 79.45499 | -43.43751 | 37.02144 |
| H | 79.84065 | -41.43963 | 39.36261 |
| H | 81.14757 | -42.33578 | 38.53579 |
| H | 79.95456 | -43.21316 | 39.52679 |
| H | 77.52740 | -40.73110 | 38.46587 |
| H | 75.32101 | -42.31816 | 39.43036 |
| H | 75.06573 | -41.92116 | 37.71766 |
| H | 74.02337 | -40.16819 | 39.02882 |
| H | 75.42665 | -39.47104 | 38.22367 |
| H | 83.55944 | -36.49702 | 44.85400 |
| H | 83.27378 | -41.35655 | 37.03091 |
| H | 83.99764 | -40.10795 | 36.01030 |
| H | 84.69920 | -40.44180 | 37.62018 |
| H | 84.36242 | -38.58358 | 38.61074 |
| H | 81.85109 | -37.06427 | 38.31670 |
| H | 83.13109 | -37.89858 | 40.99266 |
| H | 81.56754 | -38.45718 | 40.37285 |
| H | 83.41599 | -36.44832 | 38.92722 |

**Table S6.3 Ubiquinone stacked, SQ N2[ox]**

211

# E=-12375.76050826 Hartree

|    |          |           |          |
|----|----------|-----------|----------|
| C  | 71.34034 | -25.07689 | 32.89076 |
| C  | 72.40805 | -24.35274 | 32.21069 |
| C  | 73.52599 | -23.89958 | 33.02776 |
| C  | 73.57114 | -24.08294 | 34.39647 |
| C  | 72.48711 | -24.80238 | 35.06715 |
| C  | 71.38115 | -25.27775 | 34.26244 |
| C  | 70.16150 | -25.49794 | 32.05626 |
| C  | 75.32693 | -23.81462 | 31.44613 |
| C  | 75.43821 | -22.59937 | 34.89755 |
| C  | 70.21521 | -25.93086 | 34.98748 |
| C  | 70.19862 | -27.43595 | 34.88058 |
| C  | 69.21017 | -28.21133 | 34.40641 |
| C  | 67.87692 | -27.77431 | 33.86467 |
| O  | 72.38298 | -24.10687 | 30.97563 |
| O  | 74.50160 | -23.14703 | 32.39804 |
| O  | 74.55538 | -23.66479 | 35.23478 |
| O  | 72.53273 | -24.95590 | 36.33504 |
| C* | 67.23998 | -22.83799 | 33.62699 |
| C  | 69.74817 | -22.31969 | 34.04642 |
| C  | 68.50443 | -22.04245 | 33.51546 |
| N  | 70.58608 | -21.31513 | 33.61511 |
| N  | 68.59318 | -20.87536 | 32.77637 |
| C  | 69.85314 | -20.47330 | 32.85789 |
| C* | 76.92097 | -28.86699 | 39.93099 |
| C  | 75.65052 | -28.44942 | 39.24007 |
| C  | 75.61970 | -27.31689 | 38.41285 |
| C  | 74.44281 | -26.87695 | 37.80998 |
| C  | 73.23656 | -27.57960 | 38.01922 |
| O  | 72.06855 | -27.18085 | 37.50141 |
| C  | 74.45099 | -29.15884 | 39.41800 |
| C  | 73.26330 | -28.74162 | 38.81754 |
| C* | 77.29698 | -23.20700 | 40.02999 |
| C* | 76.39197 | -23.68199 | 38.88999 |
| C* | 75.38298 | -22.57599 | 38.53599 |
| C* | 77.16697 | -24.08299 | 37.64199 |
| C  | 73.18500 | -19.96279 | 31.77332 |
| O  | 73.30190 | -20.75653 | 32.95208 |
| C* | 72.55898 | -20.73499 | 30.62099 |
| C* | 67.48798 | -17.76800 | 29.31099 |
| C  | 68.11676 | -18.54074 | 30.44882 |
| O  | 67.30861 | -19.45734 | 30.94982 |
| O  | 69.25257 | -18.32473 | 30.84064 |
| H  | 69.91046 | -26.55864 | 32.20912 |
| H  | 70.37472 | -25.32184 | 30.99384 |
| H  | 69.26388 | -24.90969 | 32.32156 |
| H  | 76.02684 | -23.06261 | 31.05347 |
| H  | 74.72056 | -24.22483 | 30.62570 |
| H  | 75.89916 | -24.62354 | 31.93475 |
| H  | 75.93242 | -22.31488 | 35.83302 |
| H  | 74.89466 | -21.72934 | 34.50168 |
| H  | 76.20043 | -22.90900 | 34.16629 |
| H  | 70.28135 | -25.65846 | 36.05347 |
| H  | 69.26970 | -25.50834 | 34.61398 |
| H  | 71.10705 | -27.92084 | 35.25357 |
| H  | 69.37783 | -29.29679 | 34.40958 |
| H  | 67.75440 | -26.68160 | 33.85849 |
| H  | 67.04912 | -28.20296 | 34.45819 |
| H  | 67.73522 | -28.13215 | 32.82909 |
| H  | 66.41028 | -22.22792 | 34.02233 |
| H  | 67.38138 | -23.70053 | 34.29570 |
| H  | 66.92425 | -23.21930 | 32.64060 |
| H  | 70.10106 | -23.14154 | 34.65919 |
| H  | 71.61261 | -21.25637 | 33.67464 |
| H  | 67.76105 | -20.01324 | 31.69660 |
| H  | 70.24130 | -19.58989 | 32.35697 |
| H  | 77.62085 | -28.02226 | 40.03055 |
| H  | 77.46740 | -29.66917 | 39.40616 |
| H  | 76.69157 | -29.21546 | 40.95229 |
| H  | 76.53942 | -26.75093 | 38.24516 |
| H  | 74.42651 | -25.97511 | 37.19374 |
| H  | 72.18094 | -26.29196 | 37.02278 |



|    |          |           |          |
|----|----------|-----------|----------|
| H  | 74.44084 | -30.05302 | 40.05198 |
| H  | 72.32929 | -29.28866 | 38.96944 |
| H  | 78.02502 | -23.98321 | 40.32412 |
| H  | 76.70777 | -22.94014 | 40.92334 |
| H  | 77.87066 | -22.31215 | 39.72806 |
| H  | 75.82380 | -24.56259 | 39.24063 |
| H  | 75.90693 | -21.67595 | 38.16826 |
| H  | 74.79042 | -22.27669 | 39.41729 |
| H  | 74.68272 | -22.91407 | 37.75486 |
| H  | 77.71816 | -23.22078 | 37.22687 |
| H  | 76.48926 | -24.45925 | 36.86059 |
| H  | 77.91193 | -24.86884 | 37.85785 |
| H  | 72.57307 | -19.08358 | 32.03835 |
| H  | 74.18101 | -19.57635 | 31.47740 |
| H  | 73.79668 | -21.56313 | 32.69472 |
| H  | 71.53191 | -21.04580 | 30.85980 |
| H  | 73.12331 | -21.65668 | 30.41048 |
| H  | 72.52763 | -20.11318 | 29.71097 |
| H  | 68.17778 | -16.99397 | 28.95170 |
| H  | 66.54365 | -17.31068 | 29.64651 |
| H  | 67.23906 | -18.46056 | 28.49090 |
| C* | 77.18100 | -32.61600 | 44.93300 |
| C* | 77.38500 | -34.14300 | 44.93500 |
| C* | 78.86799 | -34.55900 | 44.69100 |
| C  | 79.05488 | -36.07379 | 44.82526 |
| N  | 80.36510 | -36.51499 | 44.35654 |
| C  | 81.51287 | -36.37520 | 45.02633 |
| N  | 81.51508 | -36.12262 | 46.34487 |
| N  | 82.66772 | -36.48086 | 44.36119 |
| C* | 75.72200 | -32.17300 | 44.73700 |
| O  | 74.76936 | -32.91822 | 44.68081 |
| C* | 81.64500 | -32.53700 | 42.95900 |
| N  | 79.57096 | -31.15256 | 42.45875 |
| C  | 80.31540 | -32.31638 | 42.34148 |
| C  | 78.35804 | -31.32917 | 41.92098 |
| N  | 78.30329 | -32.57865 | 41.46206 |
| C  | 79.50485 | -33.20350 | 41.68600 |
| C* | 76.29600 | -31.58300 | 37.64700 |
| C* | 76.57100 | -32.33800 | 38.96800 |
| S  | 75.40363 | -33.60606 | 39.57017 |
| C* | 77.25800 | -32.00400 | 36.55700 |
| O  | 77.93348 | -31.14878 | 35.98157 |
| N* | 77.36100 | -33.31100 | 36.20100 |
| C* | 78.07701 | -33.82500 | 35.01000 |
| C* | 77.92100 | -35.37700 | 34.73500 |
| S  | 79.13150 | -36.54774 | 35.48500 |
| C* | 71.58700 | -37.27400 | 39.17500 |
| C* | 72.87900 | -37.29900 | 40.00900 |
| C  | 72.81740 | -36.66392 | 41.38577 |
| N  | 72.80783 | -35.20268 | 41.29822 |
| C  | 73.03758 | -34.40149 | 42.33773 |
| N  | 73.05839 | -34.89786 | 43.57904 |
| N  | 73.22629 | -33.08531 | 42.13835 |
| C* | 79.04600 | -41.17200 | 35.58000 |
| O  | 78.28970 | -41.93913 | 34.99840 |
| N* | 79.48900 | -41.34100 | 36.83400 |
| C* | 79.20900 | -42.52700 | 37.59000 |
| C* | 80.08700 | -42.37100 | 38.83000 |
| C* | 77.70900 | -42.67700 | 37.91600 |
| O  | 77.17463 | -43.77621 | 37.78021 |
| N* | 77.03399 | -41.62000 | 38.40700 |
| C* | 75.58700 | -41.60000 | 38.63700 |
| C* | 75.12400 | -40.17100 | 39.01400 |
| S  | 75.69526 | -39.61181 | 40.66621 |
| C* | 83.75900 | -40.36900 | 37.05500 |
| C* | 82.81000 | -39.35800 | 37.59000 |
| O  | 81.62072 | -39.32128 | 37.26498 |
| N* | 83.37500 | -38.47700 | 38.40900 |
| C* | 82.72300 | -37.30300 | 38.94400 |
| C* | 82.25300 | -37.60100 | 40.39600 |
| S  | 81.46471 | -36.19320 | 41.25203 |
| Fe | 76.99471 | -37.97143 | 39.85120 |
| Fe | 78.45409 | -36.81791 | 37.61752 |
| Fe | 76.90298 | -35.33071 | 39.47089 |
| Fe | 79.34055 | -36.54930 | 40.36424 |
| S  | 79.01351 | -34.85213 | 38.72914 |

|   |          |           |          |
|---|----------|-----------|----------|
| S | 77.36813 | -36.37034 | 41.55174 |
| S | 79.09185 | -38.52011 | 39.07481 |
| S | 76.16861 | -36.89570 | 37.91524 |
| H | 77.53229 | -32.14014 | 45.86804 |
| H | 77.75957 | -32.11807 | 44.13864 |
| H | 77.02626 | -34.55699 | 45.89184 |
| H | 76.76236 | -34.59686 | 44.14560 |
| H | 79.54028 | -34.03103 | 45.38980 |
| H | 79.15570 | -34.27025 | 43.67613 |
| H | 78.88541 | -36.41130 | 45.86122 |
| H | 78.31313 | -36.59695 | 44.20560 |
| H | 80.46896 | -36.67098 | 43.34316 |
| H | 82.38885 | -36.06848 | 46.85481 |
| H | 80.67156 | -36.24002 | 46.89257 |
| H | 82.64042 | -36.48408 | 43.33751 |
| H | 75.57729 | -31.06883 | 44.63728 |
| H | 73.42929 | -32.50762 | 42.94769 |
| H | 82.04943 | -33.49996 | 42.61676 |
| H | 81.56065 | -32.56258 | 44.05838 |
| H | 82.36039 | -31.74396 | 42.69066 |
| H | 79.89051 | -30.28164 | 42.87713 |
| H | 77.57746 | -30.57864 | 41.85463 |
| H | 77.48284 | -33.02721 | 41.03327 |
| H | 79.69156 | -34.21643 | 41.35925 |
| H | 75.25616 | -31.73575 | 37.31353 |
| H | 76.44186 | -30.50623 | 37.77100 |
| H | 76.57693 | -31.56446 | 39.74823 |
| H | 77.58428 | -32.74849 | 38.92835 |
| H | 76.76821 | -33.98050 | 36.68656 |
| H | 77.68936 | -33.29181 | 34.12455 |
| H | 79.14534 | -33.56852 | 35.09005 |
| H | 78.04096 | -35.51092 | 33.65077 |
| H | 76.90006 | -35.70011 | 34.99188 |
| H | 71.74832 | -37.77661 | 38.20900 |
| H | 71.24729 | -36.24627 | 38.95880 |
| H | 70.76724 | -37.79356 | 39.69865 |
| H | 73.71477 | -36.84552 | 39.44886 |
| H | 73.18343 | -38.34316 | 40.16804 |
| H | 73.71178 | -36.97135 | 41.95511 |
| H | 71.92273 | -37.01447 | 41.93297 |
| H | 72.71969 | -34.77170 | 40.38235 |
| H | 72.82390 | -35.86503 | 43.76149 |
| H | 73.49392 | -34.35594 | 44.32011 |
| H | 73.62045 | -32.79834 | 41.24150 |
| H | 79.43172 | -40.23438 | 35.11278 |
| H | 80.19725 | -40.67275 | 37.15447 |
| H | 79.45479 | -43.43737 | 37.02111 |
| H | 79.84067 | -41.43941 | 39.36221 |
| H | 81.14757 | -42.33566 | 38.53578 |
| H | 79.95436 | -43.21292 | 39.52713 |
| H | 77.52755 | -40.73112 | 38.46752 |
| H | 75.32113 | -42.31792 | 39.43068 |
| H | 75.06629 | -41.92189 | 37.71757 |
| H | 74.02332 | -40.16777 | 39.02686 |
| H | 75.42790 | -39.47061 | 38.22451 |
| H | 83.56078 | -36.46717 | 44.83825 |
| H | 83.26502 | -41.35103 | 37.00477 |
| H | 84.02083 | -40.09171 | 36.02003 |
| H | 84.68764 | -40.46028 | 37.63666 |
| H | 84.36213 | -38.58432 | 38.61166 |
| H | 81.85116 | -37.06422 | 38.31666 |
| H | 83.13117 | -37.90093 | 40.99160 |
| H | 81.56582 | -38.45580 | 40.37250 |
| H | 83.41591 | -36.44825 | 38.92732 |

**Table S6.4 Ubiquinone H-bonded, Q N2[red]**

211

# E=-12375.75002391 Hartree

|    |          |           |          |
|----|----------|-----------|----------|
| C  | 72.05445 | -24.74662 | 35.68251 |
| C  | 71.94481 | -23.99226 | 36.96824 |
| C  | 72.17705 | -22.52546 | 37.00894 |
| C  | 72.63107 | -21.88656 | 35.89418 |
| C  | 72.83317 | -22.65922 | 34.62387 |
| C  | 72.52699 | -24.11596 | 34.57693 |
| C  | 71.65404 | -26.19175 | 35.72825 |
| C  | 70.71227 | -21.77563 | 38.73007 |
| C  | 73.03481 | -19.66955 | 36.81955 |
| C* | 72.67300 | -24.74800 | 33.21300 |
| C  | 71.39464 | -24.56275 | 32.42029 |
| C  | 70.63011 | -25.52270 | 31.87866 |
| C  | 70.85230 | -27.00745 | 31.89802 |
| O  | 71.64276 | -24.56532 | 38.01481 |
| O  | 72.03891 | -21.89782 | 38.19974 |
| O  | 72.88962 | -20.58695 | 35.72212 |
| O  | 73.22156 | -22.07831 | 33.62317 |
| C* | 67.24000 | -22.83800 | 33.62700 |
| C  | 69.40440 | -21.77616 | 34.59210 |
| C  | 68.41625 | -21.91317 | 33.63872 |
| N  | 70.25397 | -20.79096 | 34.12095 |
| N  | 68.67029 | -21.02532 | 32.61029 |
| C  | 69.77526 | -20.37214 | 32.92879 |
| C* | 76.92100 | -28.86700 | 39.93100 |
| C  | 75.51038 | -28.44788 | 39.60999 |
| C  | 75.26249 | -27.26346 | 38.90420 |
| C  | 73.96415 | -26.80740 | 38.66988 |
| C  | 72.86045 | -27.54722 | 39.12992 |
| O  | 71.58161 | -27.15198 | 38.93937 |
| C  | 74.39856 | -29.18949 | 40.04568 |
| C  | 73.09325 | -28.75566 | 39.81061 |
| C* | 77.29700 | -23.20700 | 40.03000 |
| C* | 76.39200 | -23.68200 | 38.89000 |
| C* | 75.38300 | -22.57600 | 38.53600 |
| C* | 77.16700 | -24.08300 | 37.64200 |
| C  | 73.05747 | -19.50406 | 31.37601 |
| O  | 74.13838 | -19.76936 | 32.25002 |
| C* | 72.55900 | -20.73500 | 30.62100 |
| C* | 67.48800 | -17.76800 | 29.31100 |
| C  | 68.19917 | -18.77017 | 30.19040 |
| O  | 67.37912 | -19.68128 | 30.69098 |
| O  | 69.39640 | -18.72305 | 30.42331 |
| H  | 71.43196 | -26.58425 | 34.72964 |
| H  | 70.76906 | -26.33141 | 36.36434 |
| H  | 72.46126 | -26.80381 | 36.16649 |
| H  | 70.81194 | -21.25433 | 39.69096 |
| H  | 70.25258 | -22.76119 | 38.89355 |
| H  | 70.08028 | -21.17313 | 38.05359 |
| H  | 73.40753 | -18.74197 | 36.36776 |
| H  | 73.75744 | -20.05666 | 37.55052 |
| H  | 72.06939 | -19.48837 | 37.31315 |
| H  | 73.49886 | -24.24420 | 32.68734 |
| H  | 72.94044 | -25.80753 | 33.30927 |
| H  | 71.07226 | -23.52133 | 32.30701 |
| H  | 69.72918 | -25.19266 | 31.34551 |
| H  | 71.78591 | -27.30259 | 32.39948 |
| H  | 70.88400 | -27.40884 | 30.87003 |
| H  | 70.01565 | -27.52059 | 32.40479 |
| H  | 66.29653 | -22.27670 | 33.52478 |
| H  | 67.19475 | -23.42891 | 34.55346 |
| H  | 67.29934 | -23.53683 | 32.77559 |
| H  | 69.56949 | -22.28729 | 35.53588 |
| H  | 71.09472 | -20.43499 | 34.56874 |
| H  | 67.86162 | -20.28613 | 31.35779 |
| H  | 70.22818 | -19.59705 | 32.31499 |
| H  | 77.64451 | -28.43470 | 39.22258 |
| H  | 77.04457 | -29.95244 | 39.88547 |
| H  | 77.21895 | -28.52619 | 40.94016 |
| H  | 76.10494 | -26.67750 | 38.52846 |
| H  | 73.80595 | -25.86735 | 38.14001 |
| H  | 71.55924 | -26.24652 | 38.56390 |

|    |          |           |          |
|----|----------|-----------|----------|
| H  | 74.55330 | -30.13202 | 40.58173 |
| H  | 72.23353 | -29.33672 | 40.15303 |
| H  | 78.01251 | -23.99018 | 40.33335 |
| H  | 76.70539 | -22.92703 | 40.91742 |
| H  | 77.88269 | -22.32209 | 39.72344 |
| H  | 75.82204 | -24.55680 | 39.24898 |
| H  | 75.90835 | -21.65431 | 38.22831 |
| H  | 74.72168 | -22.32726 | 39.38108 |
| H  | 74.73976 | -22.88032 | 37.69588 |
| H  | 77.72045 | -23.22191 | 37.22800 |
| H  | 76.49111 | -24.45454 | 36.85354 |
| H  | 77.90264 | -24.87815 | 37.85265 |
| H  | 72.21090 | -19.03360 | 31.91892 |
| H  | 73.41026 | -18.74476 | 30.65663 |
| H  | 73.84686 | -20.44528 | 32.88398 |
| H  | 72.19854 | -21.50361 | 31.32322 |
| H  | 73.37143 | -21.17781 | 30.02234 |
| H  | 71.72307 | -20.46238 | 29.95647 |
| H  | 68.21511 | -17.09412 | 28.84116 |
| H  | 66.78240 | -17.18628 | 29.92610 |
| H  | 66.89643 | -18.28988 | 28.54293 |
| C* | 77.18100 | -32.61600 | 44.93300 |
| C* | 77.38500 | -34.14300 | 44.93500 |
| C* | 78.86799 | -34.55900 | 44.69100 |
| C  | 79.04078 | -36.07810 | 44.79538 |
| N  | 80.34779 | -36.51957 | 44.32107 |
| C  | 81.49496 | -36.38243 | 44.98969 |
| N  | 81.49565 | -36.14637 | 46.31441 |
| N  | 82.64842 | -36.46892 | 44.32100 |
| C* | 75.72200 | -32.17300 | 44.73700 |
| O  | 74.77363 | -32.92080 | 44.65166 |
| C* | 81.64500 | -32.53700 | 42.95900 |
| N  | 79.57074 | -31.17276 | 42.38738 |
| C  | 80.31206 | -32.34375 | 42.33972 |
| C  | 78.35746 | -31.37973 | 41.85789 |
| N  | 78.30156 | -32.65457 | 41.47372 |
| C  | 79.49882 | -33.26598 | 41.73914 |
| C* | 76.29600 | -31.58300 | 37.64700 |
| C* | 76.57100 | -32.33800 | 38.96800 |
| S  | 75.39317 | -33.60687 | 39.52743 |
| C* | 77.25800 | -32.00400 | 36.55700 |
| O  | 77.90011 | -31.13807 | 35.95355 |
| N* | 77.36100 | -33.31100 | 36.20100 |
| C* | 78.07701 | -33.82500 | 35.01000 |
| C* | 77.92100 | -35.37700 | 34.73500 |
| S  | 79.19616 | -36.53023 | 35.39582 |
| C* | 71.58700 | -37.27400 | 39.17500 |
| C* | 72.87900 | -37.29900 | 40.00900 |
| C  | 72.83581 | -36.62237 | 41.36622 |
| N  | 72.86355 | -35.16258 | 41.23322 |
| C  | 73.03488 | -34.33434 | 42.26240 |
| N  | 72.87200 | -34.77236 | 43.51724 |
| N  | 73.33714 | -33.04294 | 42.03470 |
| C* | 79.04600 | -41.17200 | 35.58000 |
| O  | 78.32183 | -41.96021 | 34.98280 |
| N* | 79.48900 | -41.34100 | 36.83400 |
| C* | 79.20900 | -42.52700 | 37.59000 |
| C* | 80.08700 | -42.37100 | 38.83000 |
| C* | 77.70900 | -42.67700 | 37.91600 |
| O  | 77.17251 | -43.77566 | 37.76710 |
| N* | 77.03399 | -41.62000 | 38.40700 |
| C* | 75.58700 | -41.60000 | 38.63700 |
| C* | 75.12400 | -40.17100 | 39.01400 |
| S  | 75.63326 | -39.62817 | 40.69182 |
| C* | 83.75900 | -40.36900 | 37.05500 |
| C* | 82.81000 | -39.35800 | 37.59000 |
| O  | 81.62623 | -39.31806 | 37.25170 |
| N* | 83.37500 | -38.47700 | 38.40900 |
| C* | 82.72300 | -37.30300 | 38.94400 |
| C* | 82.25300 | -37.60100 | 40.39600 |
| S  | 81.47645 | -36.20851 | 41.27309 |
| Fe | 76.98514 | -37.95817 | 39.91157 |
| Fe | 78.45840 | -36.92811 | 37.52944 |
| Fe | 76.91049 | -35.37971 | 39.47370 |
| Fe | 79.33014 | -36.50068 | 40.39498 |
| S  | 79.01238 | -34.84687 | 38.76460 |

|   |          |           |          |
|---|----------|-----------|----------|
| S | 77.29621 | -36.32670 | 41.61393 |
| S | 79.07395 | -38.57071 | 39.23546 |
| S | 76.11895 | -36.94570 | 37.95494 |
| H | 77.53757 | -32.13620 | 45.86402 |
| H | 77.75513 | -32.12025 | 44.13254 |
| H | 77.02421 | -34.55751 | 45.89115 |
| H | 76.76697 | -34.59530 | 44.14145 |
| H | 79.54040 | -34.04756 | 45.40251 |
| H | 79.15892 | -34.25659 | 43.68376 |
| H | 78.86328 | -36.43672 | 45.82344 |
| H | 78.29854 | -36.57549 | 44.15517 |
| H | 80.45190 | -36.65830 | 43.30122 |
| H | 82.36964 | -36.11377 | 46.82518 |
| H | 80.65415 | -36.29385 | 46.85790 |
| H | 82.60535 | -36.45380 | 43.29193 |
| H | 75.57529 | -31.06598 | 44.66223 |
| H | 73.52824 | -32.46643 | 42.84759 |
| H | 82.04160 | -33.51748 | 42.65842 |
| H | 81.57047 | -32.51154 | 44.05945 |
| H | 82.36276 | -31.76177 | 42.64794 |
| H | 79.89243 | -30.28020 | 42.75366 |
| H | 77.57928 | -30.63294 | 41.75343 |
| H | 77.49330 | -33.13668 | 41.05425 |
| H | 79.67827 | -34.30104 | 41.48336 |
| H | 75.25746 | -31.73960 | 37.31203 |
| H | 76.44979 | -30.50488 | 37.77137 |
| H | 76.57539 | -31.58158 | 39.76141 |
| H | 77.57925 | -32.76570 | 38.92892 |
| H | 76.87147 | -34.00459 | 36.76326 |
| H | 77.69075 | -33.27608 | 34.13324 |
| H | 79.14756 | -33.57466 | 35.09103 |
| H | 77.94864 | -35.49458 | 33.64177 |
| H | 76.92222 | -35.70452 | 35.06650 |
| H | 71.73751 | -37.81403 | 38.22750 |
| H | 71.27155 | -36.24620 | 38.92393 |
| H | 70.75429 | -37.75621 | 39.71482 |
| H | 73.72635 | -36.88746 | 39.43387 |
| H | 73.16740 | -38.34264 | 40.19987 |
| H | 73.72076 | -36.93944 | 41.94556 |
| H | 71.92820 | -36.92613 | 41.91950 |
| H | 72.98426 | -34.77252 | 40.30162 |
| H | 72.61756 | -35.73451 | 43.70049 |
| H | 73.27956 | -34.23547 | 44.27676 |
| H | 73.88442 | -32.85641 | 41.18280 |
| H | 79.40144 | -40.21593 | 35.12688 |
| H | 80.14969 | -40.63900 | 37.18255 |
| H | 79.45403 | -43.43565 | 37.01816 |
| H | 79.84366 | -41.43530 | 39.35657 |
| H | 81.14771 | -42.33976 | 38.53531 |
| H | 79.95057 | -43.21086 | 39.52941 |
| H | 77.53564 | -40.73809 | 38.51824 |
| H | 75.31847 | -42.32051 | 39.42827 |
| H | 75.07270 | -41.92419 | 37.71422 |
| H | 74.02290 | -40.15845 | 38.97760 |
| H | 75.46627 | -39.46342 | 38.24743 |
| H | 83.54191 | -36.45843 | 44.79657 |
| H | 83.25655 | -41.34521 | 36.98101 |
| H | 84.04129 | -40.07710 | 36.02945 |
| H | 84.67754 | -40.47928 | 37.65021 |
| H | 84.35687 | -38.59610 | 38.62866 |
| H | 81.84806 | -37.06661 | 38.31978 |
| H | 83.13222 | -37.92661 | 40.97931 |
| H | 81.54702 | -38.43989 | 40.35811 |
| H | 83.41697 | -36.44831 | 38.92386 |

Table S6.5 Ubiquinone H-bonded, Q N2[ox]

211

|                             |          |           |          |
|-----------------------------|----------|-----------|----------|
| # E=-12375.61575879 Hartree |          |           |          |
| C                           | 72.06948 | -24.82062 | 35.67262 |
| C                           | 71.88888 | -24.10814 | 36.97019 |
| C                           | 72.06221 | -22.61674 | 37.03362 |
| C                           | 72.49275 | -21.95389 | 35.91834 |
| C                           | 72.76477 | -22.66721 | 34.66322 |
| C                           | 72.51955 | -24.14122 | 34.58545 |
| C                           | 71.73525 | -26.28724 | 35.62764 |
| C                           | 71.19026 | -22.37896 | 39.31970 |
| C                           | 73.84451 | -19.97616 | 35.89062 |
| C*                          | 72.67300 | -24.74800 | 33.21300 |
| C                           | 71.41399 | -24.47145 | 32.41184 |
| C                           | 70.54273 | -25.37099 | 31.93045 |
| C                           | 70.59874 | -26.86790 | 32.02952 |
| O                           | 71.60585 | -24.71580 | 37.99929 |
| O                           | 71.86311 | -21.91101 | 38.14113 |
| O                           | 72.54836 | -20.59819 | 35.90431 |
| O                           | 73.15662 | -22.05571 | 33.67220 |
| C*                          | 67.24000 | -22.83800 | 33.62700 |
| C                           | 69.27015 | -21.73492 | 34.79143 |
| C                           | 68.22655 | -21.74368 | 33.88959 |
| N                           | 69.88410 | -20.50499 | 34.65794 |
| N                           | 68.21746 | -20.53499 | 33.21514 |
| C                           | 69.22460 | -19.82281 | 33.69879 |
| C*                          | 76.92100 | -28.86700 | 39.93100 |
| C                           | 75.49652 | -28.50019 | 39.61379 |
| C                           | 75.21037 | -27.35319 | 38.86046 |
| C                           | 73.89892 | -26.93101 | 38.64192 |
| C                           | 72.82300 | -27.66212 | 39.17432 |
| O                           | 71.53169 | -27.28641 | 39.01736 |
| C                           | 74.41086 | -29.24182 | 40.10966 |
| C                           | 73.09209 | -28.83821 | 39.89555 |
| C*                          | 77.29700 | -23.20700 | 40.03000 |
| C*                          | 76.39200 | -23.68200 | 38.89000 |
| C*                          | 75.38300 | -22.57600 | 38.53600 |
| C*                          | 77.16700 | -24.08300 | 37.64200 |
| C                           | 71.55342 | -20.16212 | 31.61157 |
| O                           | 72.17249 | -19.59073 | 32.75505 |
| C*                          | 72.55900 | -20.73500 | 30.62100 |
| C*                          | 67.48800 | -17.76800 | 29.31100 |
| C                           | 67.92841 | -18.38169 | 30.62361 |
| O                           | 67.22979 | -19.45747 | 30.95117 |
| O                           | 68.83943 | -17.92710 | 31.29677 |
| H                           | 70.95371 | -26.47559 | 34.87523 |
| H                           | 71.37903 | -26.65980 | 36.59293 |
| H                           | 72.61591 | -26.88406 | 35.33985 |
| H                           | 71.01546 | -21.47601 | 39.91886 |
| H                           | 71.81719 | -23.08847 | 39.87629 |
| H                           | 70.23146 | -22.85582 | 39.07152 |
| H                           | 73.67022 | -18.90585 | 35.72373 |
| H                           | 74.46567 | -20.37641 | 35.07482 |
| H                           | 74.34613 | -20.12819 | 36.85977 |
| H                           | 73.52845 | -24.26744 | 32.71311 |
| H                           | 72.88022 | -25.82253 | 33.28345 |
| H                           | 71.20827 | -23.40830 | 32.24513 |
| H                           | 69.67842 | -24.97285 | 31.38347 |
| H                           | 71.49684 | -27.23770 | 32.54556 |
| H                           | 70.57454 | -27.32441 | 31.02462 |
| H                           | 69.71366 | -27.25529 | 32.56506 |
| H                           | 66.20646 | -22.49772 | 33.80710 |
| H                           | 67.43733 | -23.70455 | 34.27507 |
| H                           | 67.29358 | -23.17486 | 32.57778 |
| H                           | 69.60835 | -22.48504 | 35.49919 |
| H                           | 70.75500 | -20.20789 | 35.09888 |
| H                           | 67.56412 | -19.87251 | 31.82514 |
| H                           | 69.52450 | -18.84481 | 33.33113 |
| H                           | 77.62489 | -28.41229 | 39.21713 |
| H                           | 77.09471 | -29.94754 | 39.90174 |
| H                           | 77.20939 | -28.50407 | 40.93522 |
| H                           | 76.03198 | -26.76826 | 38.43851 |
| H                           | 73.70890 | -26.02519 | 38.06654 |

|    |          |           |          |
|----|----------|-----------|----------|
| H  | 71.48847 | -26.38818 | 38.63006 |
| H  | 74.59835 | -30.15445 | 40.68619 |
| H  | 72.25087 | -29.41338 | 40.28980 |
| H  | 78.01709 | -23.98792 | 40.32821 |
| H  | 76.70680 | -22.93272 | 40.92003 |
| H  | 77.87751 | -22.31834 | 39.72499 |
| H  | 75.82266 | -24.55985 | 39.24692 |
| H  | 75.90852 | -21.66205 | 38.20776 |
| H  | 74.74481 | -22.30738 | 39.39358 |
| H  | 74.72098 | -22.88514 | 37.71119 |
| H  | 77.72457 | -23.22313 | 37.23117 |
| H  | 76.49111 | -24.44906 | 36.85077 |
| H  | 77.89919 | -24.88164 | 37.85192 |
| H  | 70.83248 | -20.95327 | 31.90326 |
| H  | 70.95486 | -19.36219 | 31.14775 |
| H  | 72.63953 | -20.31228 | 33.20979 |
| H  | 73.12639 | -21.56045 | 31.08161 |
| H  | 73.27572 | -19.95950 | 30.30441 |
| H  | 72.04977 | -21.12738 | 29.72447 |
| H  | 68.05361 | -16.84804 | 29.11820 |
| H  | 66.40807 | -17.55458 | 29.34044 |
| H  | 67.65537 | -18.49000 | 28.49555 |
| C* | 77.18100 | -32.61600 | 44.93300 |
| C* | 77.38500 | -34.14300 | 44.93500 |
| C* | 78.86799 | -34.55900 | 44.69100 |
| C  | 79.05733 | -36.07308 | 44.83252 |
| N  | 80.36742 | -36.51456 | 44.36447 |
| C  | 81.51431 | -36.38992 | 45.03920 |
| N  | 81.51459 | -36.15450 | 46.36088 |
| N  | 82.67018 | -36.48955 | 44.37526 |
| C* | 75.72200 | -32.17300 | 44.73700 |
| O  | 74.77238 | -32.91856 | 44.64787 |
| C* | 81.64500 | -32.53700 | 42.95900 |
| N  | 79.56217 | -31.14046 | 42.53261 |
| C  | 80.30841 | -32.29660 | 42.36154 |
| C  | 78.34251 | -31.29820 | 42.00340 |
| N  | 78.28666 | -32.52878 | 41.49317 |
| C  | 79.49265 | -33.15945 | 41.67913 |
| C* | 76.29600 | -31.58300 | 37.64700 |
| C* | 76.57100 | -32.33800 | 38.96800 |
| S  | 75.39840 | -33.60142 | 39.57071 |
| C* | 77.25800 | -32.00400 | 36.55700 |
| O  | 77.92195 | -31.14479 | 35.97332 |
| N* | 77.36100 | -33.31100 | 36.20100 |
| C* | 78.07701 | -33.82500 | 35.01000 |
| C* | 77.92100 | -35.37700 | 34.73500 |
| S  | 79.13040 | -36.54440 | 35.49013 |
| C* | 71.58700 | -37.27400 | 39.17500 |
| C* | 72.87900 | -37.29900 | 40.00900 |
| C  | 72.81632 | -36.65640 | 41.38208 |
| N  | 72.79977 | -35.19511 | 41.28591 |
| C  | 73.01545 | -34.38784 | 42.32332 |
| N  | 73.01927 | -34.87628 | 43.56712 |
| N  | 73.20626 | -33.07097 | 42.11726 |
| C* | 79.04600 | -41.17200 | 35.58000 |
| O  | 78.28492 | -41.93543 | 35.00013 |
| N* | 79.48900 | -41.34100 | 36.83400 |
| C* | 79.20900 | -42.52700 | 37.59000 |
| C* | 80.08700 | -42.37100 | 38.83000 |
| C* | 77.70900 | -42.67700 | 37.91600 |
| O  | 77.17419 | -43.77566 | 37.78028 |
| N* | 77.03399 | -41.62000 | 38.40700 |
| C* | 75.58700 | -41.60000 | 38.63700 |
| C* | 75.12400 | -40.17100 | 39.01400 |
| S  | 75.70029 | -39.60869 | 40.66357 |
| C* | 83.75900 | -40.36900 | 37.05500 |
| C* | 82.81000 | -39.35800 | 37.59000 |
| O  | 81.61993 | -39.32161 | 37.26684 |
| N* | 83.37500 | -38.47700 | 38.40900 |
| C* | 82.72300 | -37.30300 | 38.94400 |
| C* | 82.25300 | -37.60100 | 40.39600 |
| S  | 81.46733 | -36.19122 | 41.25535 |
| Fe | 76.99738 | -37.96509 | 39.85656 |
| Fe | 78.45491 | -36.80999 | 37.62409 |
| Fe | 76.90813 | -35.32380 | 39.48482 |
| Fe | 79.34402 | -36.54177 | 40.37370 |

|   |          |           |          |
|---|----------|-----------|----------|
| S | 79.01568 | -34.84261 | 38.73692 |
| S | 77.37011 | -36.36807 | 41.56113 |
| S | 79.09332 | -38.51024 | 39.07886 |
| S | 76.16979 | -36.88646 | 37.92362 |
| H | 77.53220 | -32.14091 | 45.86838 |
| H | 77.75945 | -32.11730 | 44.14091 |
| H | 77.02689 | -34.55570 | 45.89259 |
| H | 76.76170 | -34.59737 | 44.14652 |
| H | 79.54099 | -34.02718 | 45.38615 |
| H | 79.15403 | -34.27601 | 43.67329 |
| H | 78.88968 | -36.40518 | 45.87020 |
| H | 78.31501 | -36.60037 | 44.21702 |
| H | 80.47282 | -36.66590 | 43.35081 |
| H | 82.38805 | -36.11149 | 46.87269 |
| H | 80.67150 | -36.28508 | 46.90644 |
| H | 82.64688 | -36.49249 | 43.35203 |
| H | 75.57511 | -31.06638 | 44.66671 |
| H | 73.41573 | -32.49654 | 42.92759 |
| H | 82.05318 | -33.47953 | 42.56777 |
| H | 81.56687 | -32.61753 | 44.05614 |
| H | 82.35268 | -31.72628 | 42.72587 |
| H | 79.88424 | -30.28950 | 42.98866 |
| H | 77.55547 | -30.55139 | 41.99039 |
| H | 77.46247 | -32.96872 | 41.06288 |
| H | 79.67692 | -34.15851 | 41.30839 |
| H | 75.25593 | -31.73475 | 37.31390 |
| H | 76.45195 | -30.50644 | 37.77703 |
| H | 76.57399 | -31.57348 | 39.75352 |
| H | 77.58433 | -32.74915 | 38.93024 |
| H | 76.78887 | -33.98632 | 36.70323 |
| H | 77.68898 | -33.29035 | 34.12568 |
| H | 79.14565 | -33.56951 | 35.08971 |
| H | 78.04455 | -35.51080 | 33.65114 |
| H | 76.89910 | -35.69954 | 34.98891 |
| H | 71.74372 | -37.78984 | 38.21525 |
| H | 71.25523 | -36.24626 | 38.94641 |
| H | 70.76331 | -37.78059 | 39.70507 |
| H | 73.71657 | -36.85117 | 39.44694 |
| H | 73.18017 | -38.34314 | 40.17419 |
| H | 73.71174 | -36.95637 | 41.95363 |
| H | 71.92321 | -37.00726 | 41.93118 |
| H | 72.72391 | -34.77045 | 40.36604 |
| H | 72.78329 | -35.84277 | 43.75233 |
| H | 73.44642 | -34.33184 | 44.31093 |
| H | 73.62515 | -32.79815 | 41.22643 |
| H | 79.43638 | -40.23700 | 35.11114 |
| H | 80.20219 | -40.67655 | 37.15161 |
| H | 79.45502 | -43.43753 | 37.02148 |
| H | 79.84094 | -41.43938 | 39.36237 |
| H | 81.14758 | -42.33621 | 38.53581 |
| H | 79.95426 | -43.21294 | 39.52700 |
| H | 77.52723 | -40.73100 | 38.46544 |
| H | 75.32100 | -42.31814 | 39.43037 |
| H | 75.06559 | -41.92110 | 37.71772 |
| H | 74.02343 | -40.16857 | 39.03124 |
| H | 75.42570 | -39.47066 | 38.22360 |
| H | 83.56139 | -36.51040 | 44.85577 |
| H | 83.27303 | -41.35611 | 37.02885 |
| H | 83.99948 | -40.10670 | 36.01102 |
| H | 84.69831 | -40.44329 | 37.62147 |
| H | 84.36246 | -38.58346 | 38.61064 |
| H | 81.85122 | -37.06398 | 38.31667 |
| H | 83.13061 | -37.90193 | 40.99164 |
| H | 81.56415 | -38.45433 | 40.37331 |
| H | 83.41622 | -36.44851 | 38.92747 |



**Table S6.6 Ubiquinone H-bonded, SQ N2[ox]**

211

# E=-12375.76354084 Hartree

|    |          |           |          |
|----|----------|-----------|----------|
| C  | 72.12343 | -24.78154 | 35.70135 |
| C  | 71.98101 | -24.08606 | 36.97033 |
| C  | 72.25112 | -22.65486 | 37.01167 |
| C  | 72.70468 | -21.98473 | 35.89007 |
| C  | 72.91555 | -22.69950 | 34.63333 |
| C  | 72.59227 | -24.10883 | 34.58572 |
| C  | 71.73375 | -26.23695 | 35.62591 |
| C  | 70.86469 | -21.91599 | 38.80415 |
| C  | 72.43898 | -19.69733 | 36.68573 |
| C* | 72.67300 | -24.74800 | 33.21300 |
| C  | 71.36439 | -24.58717 | 32.47411 |
| C  | 70.57110 | -25.54894 | 31.97674 |
| C  | 70.79449 | -27.03560 | 32.00317 |
| O  | 71.63317 | -24.67298 | 38.04882 |
| O  | 72.15715 | -22.00233 | 38.21478 |
| O  | 72.96428 | -20.65465 | 35.77537 |
| O  | 73.27949 | -22.07570 | 33.59275 |
| C* | 67.24000 | -22.83800 | 33.62700 |
| C  | 69.60851 | -22.04071 | 34.33380 |
| C  | 68.46000 | -21.97342 | 33.57195 |
| N  | 70.43431 | -21.03849 | 33.86397 |
| N  | 68.60022 | -20.94818 | 32.65394 |
| C  | 69.79623 | -20.41650 | 32.85308 |
| C* | 76.92100 | -28.86700 | 39.93100 |
| C  | 75.51214 | -28.43905 | 39.61276 |
| C  | 75.26957 | -27.29583 | 38.83520 |
| C  | 73.97860 | -26.81880 | 38.61121 |
| C  | 72.86715 | -27.48914 | 39.16295 |
| O  | 71.60739 | -27.06079 | 38.99863 |
| C  | 74.39742 | -29.11709 | 40.13354 |
| C  | 73.09669 | -28.66011 | 39.91422 |
| C* | 77.29700 | -23.20700 | 40.03000 |
| C* | 76.39200 | -23.68200 | 38.89000 |
| C* | 75.38300 | -22.57600 | 38.53600 |
| C* | 77.16700 | -24.08300 | 37.64200 |
| C  | 73.10346 | -19.57847 | 31.46126 |
| O  | 74.22148 | -19.92296 | 32.24698 |
| C* | 72.55900 | -20.73500 | 30.62100 |
| C* | 67.48800 | -17.76800 | 29.31100 |
| C  | 68.16405 | -18.76086 | 30.22499 |
| O  | 67.30502 | -19.55204 | 30.84103 |
| O  | 69.37524 | -18.79605 | 30.37768 |
| H  | 70.97724 | -26.39875 | 34.84104 |
| H  | 71.32787 | -26.59356 | 36.57865 |
| H  | 72.59851 | -26.87508 | 35.37342 |
| H  | 70.97212 | -21.30493 | 39.71266 |
| H  | 70.47844 | -22.91105 | 39.07028 |
| H  | 70.14991 | -21.41674 | 38.12258 |
| H  | 72.63216 | -18.71627 | 36.22802 |
| H  | 72.92562 | -19.75450 | 37.66918 |
| H  | 71.35009 | -19.82450 | 36.81575 |
| H  | 73.45827 | -24.22539 | 32.64423 |
| H  | 72.96023 | -25.80609 | 33.28766 |
| H  | 71.03590 | -23.54765 | 32.36792 |
| H  | 69.64388 | -25.22541 | 31.48514 |
| H  | 71.72365 | -27.32010 | 32.51843 |
| H  | 70.83787 | -27.44668 | 30.97828 |
| H  | 69.95769 | -27.55084 | 32.50842 |
| H  | 66.33086 | -22.24038 | 33.80953 |
| H  | 67.32883 | -23.58697 | 34.42774 |
| H  | 67.09448 | -23.37235 | 32.67287 |
| H  | 69.91600 | -22.71693 | 35.12638 |
| H  | 71.40548 | -20.87471 | 34.12496 |
| H  | 67.77749 | -20.17128 | 31.52331 |
| H  | 70.21416 | -19.60682 | 32.26113 |
| H  | 77.64035 | -28.47368 | 39.19580 |
| H  | 77.03787 | -29.95557 | 39.93577 |
| H  | 77.24160 | -28.48815 | 40.92043 |
| H  | 76.11424 | -26.75546 | 38.39855 |
| H  | 73.81644 | -25.91614 | 38.02109 |
| H  | 71.59787 | -26.14826 | 38.56101 |

|    |          |           |          |
|----|----------|-----------|----------|
| H  | 74.54887 | -30.02040 | 40.73679 |
| H  | 72.23350 | -29.18836 | 40.32750 |
| H  | 78.01527 | -23.98788 | 40.33563 |
| H  | 76.70429 | -22.92643 | 40.91677 |
| H  | 77.88033 | -22.32038 | 39.72319 |
| H  | 75.82347 | -24.56001 | 39.24561 |
| H  | 75.90927 | -21.65077 | 38.24073 |
| H  | 74.71356 | -22.33569 | 39.37639 |
| H  | 74.74189 | -22.87282 | 37.69339 |
| H  | 77.72047 | -23.22169 | 37.22789 |
| H  | 76.48810 | -24.44975 | 36.85433 |
| H  | 77.90246 | -24.87986 | 37.85083 |
| H  | 72.28422 | -19.16478 | 32.08920 |
| H  | 73.41248 | -18.75077 | 30.79677 |
| H  | 73.93552 | -20.62872 | 32.86673 |
| H  | 72.26752 | -21.57056 | 31.27690 |
| H  | 73.33200 | -21.10210 | 29.92545 |
| H  | 71.67482 | -20.41321 | 30.04590 |
| H  | 68.23788 | -17.19612 | 28.75001 |
| H  | 66.87183 | -17.08223 | 29.91522 |
| H  | 66.80830 | -18.28981 | 28.61926 |
| C* | 77.18100 | -32.61600 | 44.93300 |
| C* | 77.38500 | -34.14300 | 44.93500 |
| C* | 78.86799 | -34.55900 | 44.69100 |
| C  | 79.05754 | -36.07282 | 44.83261 |
| N  | 80.36795 | -36.51355 | 44.36416 |
| C  | 81.51598 | -36.37220 | 45.03349 |
| N  | 81.51857 | -36.11935 | 46.35196 |
| N  | 82.67057 | -36.47650 | 44.36781 |
| C* | 75.72200 | -32.17300 | 44.73700 |
| O  | 74.77172 | -32.91909 | 44.66029 |
| C* | 81.64500 | -32.53700 | 42.95900 |
| N  | 79.57133 | -31.12935 | 42.52322 |
| C  | 80.30892 | -32.29280 | 42.36220 |
| C  | 78.35405 | -31.27895 | 41.98691 |
| N  | 78.29091 | -32.51199 | 41.48339 |
| C  | 79.48979 | -33.15253 | 41.68041 |
| C* | 76.29600 | -31.58300 | 37.64700 |
| C* | 76.57100 | -32.33800 | 38.96800 |
| S  | 75.40113 | -33.61233 | 39.55544 |
| C* | 77.25800 | -32.00400 | 36.55700 |
| O  | 77.92785 | -31.14778 | 35.97675 |
| N* | 77.36100 | -33.31100 | 36.20100 |
| C* | 78.07701 | -33.82500 | 35.01000 |
| C* | 77.92100 | -35.37700 | 34.73500 |
| S  | 79.13140 | -36.54627 | 35.48780 |
| C* | 71.58700 | -37.27400 | 39.17500 |
| C* | 72.87900 | -37.29900 | 40.00900 |
| C  | 72.82184 | -36.65313 | 41.38069 |
| N  | 72.80734 | -35.19248 | 41.28202 |
| C  | 73.02275 | -34.38376 | 42.31885 |
| N  | 73.03124 | -34.87320 | 43.56316 |
| N  | 73.20737 | -33.06772 | 42.11457 |
| C* | 79.04600 | -41.17200 | 35.58000 |
| O  | 78.28972 | -41.93910 | 34.99833 |
| N* | 79.48900 | -41.34100 | 36.83400 |
| C* | 79.20900 | -42.52700 | 37.59000 |
| C* | 80.08700 | -42.37100 | 38.83000 |
| C* | 77.70900 | -42.67700 | 37.91600 |
| O  | 77.17452 | -43.77612 | 37.78003 |
| N* | 77.03399 | -41.62000 | 38.40700 |
| C* | 75.58700 | -41.60000 | 38.63700 |
| C* | 75.12400 | -40.17100 | 39.01400 |
| S  | 75.69807 | -39.61072 | 40.66506 |
| C* | 83.75900 | -40.36900 | 37.05500 |
| C* | 82.81000 | -39.35800 | 37.59000 |
| O  | 81.62039 | -39.32247 | 37.26596 |
| N* | 83.37500 | -38.47700 | 38.40900 |
| C* | 82.72300 | -37.30300 | 38.94400 |
| C* | 82.25300 | -37.60100 | 40.39600 |
| S  | 81.46856 | -36.19176 | 41.25612 |
| Fe | 77.00024 | -37.96852 | 39.85647 |
| Fe | 78.45931 | -36.81401 | 37.62311 |
| Fe | 76.90992 | -35.32688 | 39.48035 |
| Fe | 79.34383 | -36.54144 | 40.37300 |
| S  | 79.01830 | -34.84622 | 38.73447 |

|   |          |           |          |
|---|----------|-----------|----------|
| S | 77.37076 | -36.36834 | 41.55925 |
| S | 79.09749 | -38.51425 | 39.08149 |
| S | 76.17520 | -36.89319 | 37.92153 |
| H | 77.53272 | -32.14029 | 45.86785 |
| H | 77.75936 | -32.11835 | 44.13956 |
| H | 77.02661 | -34.55636 | 45.89228 |
| H | 76.76203 | -34.59712 | 44.14615 |
| H | 79.54119 | -34.02639 | 45.38540 |
| H | 79.15354 | -34.27597 | 43.67322 |
| H | 78.89067 | -36.40577 | 45.87035 |
| H | 78.31566 | -36.60044 | 44.21684 |
| H | 80.47148 | -36.66975 | 43.35098 |
| H | 82.39253 | -36.06463 | 46.86152 |
| H | 80.67545 | -36.23726 | 46.90021 |
| H | 82.64327 | -36.48120 | 43.34410 |
| H | 75.57577 | -31.06725 | 44.65609 |
| H | 73.40339 | -32.48481 | 42.92173 |
| H | 82.02472 | -33.50912 | 42.61481 |
| H | 81.58008 | -32.55297 | 44.05971 |
| H | 82.37049 | -31.75959 | 42.67199 |
| H | 79.89753 | -30.27702 | 42.97390 |
| H | 77.57540 | -30.52342 | 41.96036 |
| H | 77.46793 | -32.94440 | 41.04439 |
| H | 79.66760 | -34.15522 | 41.31674 |
| H | 75.25552 | -31.73264 | 37.31454 |
| H | 76.45181 | -30.50654 | 37.77916 |
| H | 76.55646 | -31.57553 | 39.75510 |
| H | 77.58789 | -32.74046 | 38.93520 |
| H | 76.77729 | -33.98302 | 36.69420 |
| H | 77.68926 | -33.29123 | 34.12497 |
| H | 79.14549 | -33.56891 | 35.08972 |
| H | 78.04273 | -35.51142 | 33.65105 |
| H | 76.89979 | -35.69997 | 34.99108 |
| H | 71.74257 | -37.79468 | 38.21767 |
| H | 71.25863 | -36.24638 | 38.94148 |
| H | 70.76149 | -37.77553 | 39.70719 |
| H | 73.71645 | -36.85392 | 39.44444 |
| H | 73.17919 | -38.34322 | 40.17585 |
| H | 73.71927 | -36.95431 | 41.94874 |
| H | 71.93021 | -37.00180 | 41.93380 |
| H | 72.73402 | -34.76927 | 40.36127 |
| H | 72.81159 | -35.84399 | 43.74543 |
| H | 73.46055 | -34.32753 | 44.30487 |
| H | 73.59522 | -32.78055 | 41.21513 |
| H | 79.43158 | -40.23423 | 35.11295 |
| H | 80.19759 | -40.67298 | 37.15437 |
| H | 79.45491 | -43.43741 | 37.02123 |
| H | 79.84099 | -41.43927 | 39.36215 |
| H | 81.14758 | -42.33605 | 38.53573 |
| H | 79.95415 | -43.21290 | 39.52710 |
| H | 77.52754 | -40.73117 | 38.46807 |
| H | 75.32108 | -42.31819 | 39.43041 |
| H | 75.06625 | -41.92152 | 37.71745 |
| H | 74.02335 | -40.16788 | 39.02849 |
| H | 75.42754 | -39.47047 | 38.22450 |
| H | 83.56368 | -36.46259 | 44.84478 |
| H | 83.27582 | -41.35775 | 37.03751 |
| H | 83.99166 | -40.11203 | 36.00795 |
| H | 84.70223 | -40.43740 | 37.61573 |
| H | 84.36232 | -38.58366 | 38.61091 |
| H | 81.85120 | -37.06401 | 38.31671 |
| H | 83.13092 | -37.90312 | 40.99079 |
| H | 81.56363 | -38.45390 | 40.37257 |
| H | 83.41610 | -36.44842 | 38.92725 |

**Table S6.7 Menaquinone stacked, Q N2[red]**

209

# E=-12300.35116828 Hartree

|    |          |           |          |
|----|----------|-----------|----------|
| C  | 71.10832 | -25.20052 | 32.73621 |
| C  | 72.17450 | -24.59473 | 31.87193 |
| C  | 73.44774 | -24.16257 | 32.51561 |
| C  | 73.59067 | -24.22932 | 33.91251 |
| C  | 72.51331 | -24.82718 | 34.74408 |
| C  | 71.27429 | -25.31419 | 34.08537 |
| C  | 69.84857 | -25.62618 | 32.04492 |
| C* | 70.21510 | -25.92740 | 34.97980 |
| C  | 70.26910 | -27.43885 | 34.97239 |
| C  | 69.27516 | -28.27833 | 34.64374 |
| C  | 67.87769 | -27.93727 | 34.21202 |
| O  | 72.00128 | -24.44671 | 30.67198 |
| O  | 72.65839 | -24.91114 | 35.96549 |
| C* | 67.24000 | -22.83800 | 33.62700 |
| C  | 69.72396 | -22.28521 | 34.15034 |
| C  | 68.51509 | -22.06780 | 33.51903 |
| N  | 70.58310 | -21.31397 | 33.67888 |
| N  | 68.64450 | -20.97583 | 32.68342 |
| C  | 69.89185 | -20.55333 | 32.80303 |
| C* | 76.92100 | -28.86700 | 39.93100 |
| C  | 75.64639 | -28.41028 | 39.27145 |
| C  | 75.64218 | -27.30590 | 38.40940 |
| C  | 74.46374 | -26.83169 | 37.83156 |
| C  | 73.24120 | -27.46662 | 38.10618 |
| O  | 72.06392 | -27.02929 | 37.60396 |
| C  | 74.42039 | -29.05427 | 39.51312 |
| C  | 73.23270 | -28.59669 | 38.94240 |
| C* | 77.29700 | -23.20700 | 40.03000 |
| C* | 76.39200 | -23.68200 | 38.89000 |
| C* | 75.38300 | -22.57600 | 38.53600 |
| C* | 77.16700 | -24.08300 | 37.64200 |
| C  | 73.11256 | -19.95665 | 31.80886 |
| O  | 73.27663 | -20.75043 | 32.98981 |
| C* | 72.55900 | -20.73500 | 30.62100 |
| C* | 67.48800 | -17.76800 | 29.31100 |
| C  | 68.16298 | -18.65716 | 30.32960 |
| O  | 67.32747 | -19.51707 | 30.88682 |
| O  | 69.35064 | -18.57273 | 30.60094 |
| H  | 69.59019 | -26.66283 | 32.30730 |
| H  | 69.94857 | -25.53726 | 30.95685 |
| H  | 69.00877 | -24.98568 | 32.36709 |
| H  | 70.36410 | -25.56507 | 36.00852 |
| H  | 69.22512 | -25.57027 | 34.66255 |
| H  | 71.22655 | -27.86213 | 35.29131 |
| H  | 69.49347 | -29.35220 | 34.70590 |
| H  | 67.69369 | -26.85497 | 34.14724 |
| H  | 67.13996 | -28.36204 | 34.91541 |
| H  | 67.65415 | -28.37875 | 33.22474 |
| H  | 66.40920 | -22.19634 | 33.96524 |
| H  | 67.34048 | -23.66980 | 34.34082 |
| H  | 66.94880 | -23.25667 | 32.64878 |
| H  | 70.02388 | -23.02356 | 34.88739 |
| H  | 71.59735 | -21.22613 | 33.80804 |
| H  | 67.79617 | -20.10774 | 31.58440 |
| H  | 70.29763 | -19.71086 | 32.24948 |
| H  | 77.69287 | -28.08301 | 39.89018 |
| H  | 77.35433 | -29.76208 | 39.46048 |
| H  | 76.74051 | -29.08756 | 40.99699 |
| H  | 76.58140 | -26.79286 | 38.19043 |
| H  | 74.47988 | -25.95704 | 37.17903 |
| H  | 72.20647 | -26.22206 | 37.06631 |
| H  | 74.38887 | -29.92905 | 40.17130 |
| H  | 72.28007 | -29.09295 | 39.14255 |
| H  | 78.02354 | -23.98452 | 40.32166 |
| H  | 76.70644 | -22.94349 | 40.92295 |
| H  | 77.87076 | -22.31146 | 39.73096 |
| H  | 75.82722 | -24.56335 | 39.24378 |
| H  | 75.90279 | -21.68620 | 38.13973 |
| H  | 74.80109 | -22.26069 | 39.41789 |
| H  | 74.66237 | -22.91435 | 37.77205 |
| H  | 77.67876 | -23.21145 | 37.19687 |

|    |          |           |          |
|----|----------|-----------|----------|
| H  | 76.50248 | -24.50908 | 36.87395 |
| H  | 77.93959 | -24.83925 | 37.86125 |
| H  | 72.42553 | -19.14368 | 32.09158 |
| H  | 74.07264 | -19.47675 | 31.53999 |
| H  | 73.94039 | -21.43214 | 32.81335 |
| H  | 71.63906 | -21.27423 | 30.88966 |
| H  | 73.28762 | -21.47432 | 30.25298 |
| H  | 72.32081 | -20.04564 | 29.79545 |
| H  | 68.22057 | -17.09116 | 28.85393 |
| H  | 66.69215 | -17.18588 | 29.80253 |
| H  | 67.00612 | -18.38587 | 28.53693 |
| H  | 74.84907 | -23.79848 | 35.60283 |
| C  | 74.76429 | -23.75976 | 34.51724 |
| C  | 75.80388 | -23.25599 | 33.73264 |
| H  | 76.71875 | -22.89383 | 34.20757 |
| C  | 75.67555 | -23.22305 | 32.33588 |
| H  | 76.49371 | -22.84128 | 31.72040 |
| C  | 74.49734 | -23.67086 | 31.72932 |
| H  | 74.37281 | -23.64395 | 30.64564 |
| C* | 77.18100 | -32.61600 | 44.93300 |
| C* | 77.38500 | -34.14300 | 44.93500 |
| C* | 78.86799 | -34.55900 | 44.69100 |
| C  | 79.03828 | -36.07830 | 44.79720 |
| N  | 80.34101 | -36.52489 | 44.31672 |
| C  | 81.49204 | -36.39816 | 44.98092 |
| N  | 81.50070 | -36.16487 | 46.30606 |
| N  | 82.64166 | -36.49351 | 44.30694 |
| C* | 75.72200 | -32.17300 | 44.73700 |
| O  | 74.77206 | -32.91991 | 44.66206 |
| C* | 81.64500 | -32.53700 | 42.95900 |
| N  | 79.54221 | -31.20379 | 42.40026 |
| C  | 80.31392 | -32.35469 | 42.33024 |
| C  | 78.33217 | -31.43495 | 41.87125 |
| N  | 78.30941 | -32.70264 | 41.46424 |
| C  | 79.52434 | -33.28553 | 41.71259 |
| C* | 76.29600 | -31.58300 | 37.64700 |
| C* | 76.57100 | -32.33800 | 38.96800 |
| S  | 75.39326 | -33.60418 | 39.53401 |
| C* | 77.25800 | -32.00400 | 36.55700 |
| O  | 77.90280 | -31.13843 | 35.95554 |
| N* | 77.36100 | -33.31100 | 36.20100 |
| C* | 78.07701 | -33.82500 | 35.01000 |
| C* | 77.92100 | -35.37700 | 34.73500 |
| S  | 79.19687 | -36.53209 | 35.39110 |
| C* | 71.58700 | -37.27400 | 39.17500 |
| C* | 72.87900 | -37.29900 | 40.00900 |
| C  | 72.83335 | -36.63112 | 41.36997 |
| N  | 72.86295 | -35.17117 | 41.24507 |
| C  | 73.04630 | -34.34924 | 42.27675 |
| N  | 72.89993 | -34.79527 | 43.53087 |
| N  | 73.34490 | -33.05634 | 42.05221 |
| C* | 79.04600 | -41.17200 | 35.58000 |
| O  | 78.32167 | -41.96008 | 34.98283 |
| N* | 79.48900 | -41.34100 | 36.83400 |
| C* | 79.20900 | -42.52700 | 37.59000 |
| C* | 80.08700 | -42.37100 | 38.83000 |
| C* | 77.70900 | -42.67700 | 37.91600 |
| O  | 77.17262 | -43.77576 | 37.76729 |
| N* | 77.03399 | -41.62000 | 38.40700 |
| C* | 75.58700 | -41.60000 | 38.63700 |
| C* | 75.12400 | -40.17100 | 39.01400 |
| S  | 75.63263 | -39.62824 | 40.69187 |
| C* | 83.75900 | -40.36900 | 37.05500 |
| C* | 82.81000 | -39.35800 | 37.59000 |
| O  | 81.62628 | -39.31792 | 37.25161 |
| N* | 83.37500 | -38.47700 | 38.40900 |
| C* | 82.72300 | -37.30300 | 38.94400 |
| C* | 82.25300 | -37.60100 | 40.39600 |
| S  | 81.47123 | -36.20975 | 41.26828 |
| Fe | 76.98127 | -37.95928 | 39.90545 |
| Fe | 78.45464 | -36.93301 | 37.52238 |
| Fe | 76.90450 | -35.38285 | 39.46360 |
| Fe | 79.32604 | -36.50535 | 40.38479 |
| S  | 79.00773 | -34.85298 | 38.75363 |
| S  | 77.29440 | -36.32774 | 41.60648 |
| S  | 79.06972 | -38.57496 | 39.22870 |

|   |          |           |          |
|---|----------|-----------|----------|
| S | 76.11439 | -36.94923 | 37.94702 |
| H | 77.53443 | -32.13771 | 45.86619 |
| H | 77.75711 | -32.11884 | 44.13576 |
| H | 77.02402 | -34.55763 | 45.89101 |
| H | 76.76722 | -34.59539 | 44.14124 |
| H | 79.54113 | -34.04726 | 45.40152 |
| H | 79.15899 | -34.25829 | 43.68251 |
| H | 78.86535 | -36.43438 | 45.82689 |
| H | 78.29086 | -36.57482 | 44.16222 |
| H | 80.43983 | -36.66152 | 43.29631 |
| H | 82.37748 | -36.13823 | 46.81234 |
| H | 80.66062 | -36.30470 | 46.85359 |
| H | 82.59321 | -36.47111 | 43.27798 |
| H | 75.57612 | -31.06661 | 44.65352 |
| H | 73.54028 | -32.48395 | 42.86712 |
| H | 82.05029 | -33.51457 | 42.66065 |
| H | 81.56272 | -32.51140 | 44.05872 |
| H | 82.35938 | -31.75657 | 42.65256 |
| H | 79.83951 | -30.30998 | 42.78342 |
| H | 77.53191 | -30.70935 | 41.77961 |
| H | 77.50795 | -33.19896 | 41.04742 |
| H | 79.73495 | -34.30951 | 41.43715 |
| H | 75.25823 | -31.74374 | 37.31097 |
| H | 76.44087 | -30.50428 | 37.76317 |
| H | 76.58593 | -31.57226 | 39.75555 |
| H | 77.57732 | -32.76959 | 38.92605 |
| H | 76.86678 | -34.00371 | 36.76002 |
| H | 77.69088 | -33.27628 | 34.13304 |
| H | 79.14753 | -33.57453 | 35.09118 |
| H | 77.94520 | -35.49414 | 33.64163 |
| H | 76.92306 | -35.70463 | 35.06892 |
| H | 71.74053 | -37.80539 | 38.22311 |
| H | 71.26593 | -36.24594 | 38.93212 |
| H | 70.75687 | -37.76503 | 39.71077 |
| H | 73.72485 | -36.88087 | 39.43654 |
| H | 73.17090 | -38.34283 | 40.19311 |
| H | 73.71740 | -36.95207 | 41.94851 |
| H | 71.92465 | -36.93748 | 41.92022 |
| H | 72.96657 | -34.77468 | 40.31421 |
| H | 72.64636 | -35.75818 | 43.71147 |
| H | 73.31889 | -34.26327 | 44.28775 |
| H | 73.89423 | -32.86786 | 41.20176 |
| H | 79.40156 | -40.21597 | 35.12686 |
| H | 80.14962 | -40.63898 | 37.18256 |
| H | 79.45405 | -43.43564 | 37.01815 |
| H | 79.84321 | -41.43561 | 39.35688 |
| H | 81.14769 | -42.33919 | 38.53528 |
| H | 79.95100 | -43.21117 | 39.52912 |
| H | 77.53555 | -40.73792 | 38.51759 |
| H | 75.31850 | -42.32049 | 39.42830 |
| H | 75.07266 | -41.92425 | 37.71426 |
| H | 74.02289 | -40.15876 | 38.97750 |
| H | 75.46570 | -39.46376 | 38.24692 |
| H | 83.53748 | -36.48740 | 44.77826 |
| H | 83.25555 | -41.34440 | 36.97751 |
| H | 84.04443 | -40.07502 | 36.03091 |
| H | 84.67586 | -40.48173 | 37.65237 |
| H | 84.35689 | -38.59610 | 38.62857 |
| H | 81.84786 | -37.06684 | 38.31996 |
| H | 83.13247 | -37.92347 | 40.98072 |
| H | 81.54934 | -38.44194 | 40.35815 |
| H | 83.41676 | -36.44815 | 38.92377 |

**Table S6.8 Menaquinone stacked, Q N2[ox]**

209

| # E=-12300.21507236 Hartree |          |           |          |
|-----------------------------|----------|-----------|----------|
| C                           | 71.11080 | -25.19774 | 32.73859 |
| C                           | 72.17971 | -24.59465 | 31.87528 |
| C                           | 73.45129 | -24.16116 | 32.52138 |
| C                           | 73.59248 | -24.22927 | 33.91848 |
| C                           | 72.51529 | -24.83053 | 34.74737 |
| C                           | 71.27585 | -25.31297 | 34.08783 |
| C                           | 69.85063 | -25.62061 | 32.04692 |
| C*                          | 70.21510 | -25.92740 | 34.97980 |
| C                           | 70.26870 | -27.43882 | 34.96668 |
| C                           | 69.27482 | -28.27851 | 34.63848 |
| C                           | 67.87516 | -27.93950 | 34.21284 |
| O                           | 72.00976 | -24.45092 | 30.67463 |
| O                           | 72.66262 | -24.92345 | 35.96853 |
| C*                          | 67.24000 | -22.83800 | 33.62700 |
| C                           | 69.72339 | -22.28407 | 34.15433 |
| C                           | 68.51586 | -22.06922 | 33.51937 |
| N                           | 70.58289 | -21.31337 | 33.68214 |
| N                           | 68.64654 | -20.97999 | 32.68089 |
| C                           | 69.89301 | -20.55589 | 32.80230 |
| C*                          | 76.92100 | -28.86700 | 39.93100 |
| C                           | 75.65145 | -28.41885 | 39.25614 |
| C                           | 75.64907 | -27.32149 | 38.38521 |
| C                           | 74.47070 | -26.84967 | 37.80533 |
| C                           | 73.24675 | -27.47945 | 38.08677 |
| O                           | 72.07012 | -27.04307 | 37.58817 |
| C                           | 74.42452 | -29.05942 | 39.50335 |
| C                           | 73.23749 | -28.60556 | 38.92977 |
| C*                          | 77.29700 | -23.20700 | 40.03000 |
| C*                          | 76.39200 | -23.68200 | 38.89000 |
| C*                          | 75.38300 | -22.57600 | 38.53600 |
| C*                          | 77.16700 | -24.08300 | 37.64200 |
| C                           | 73.11131 | -19.95484 | 31.80810 |
| O                           | 73.27498 | -20.74715 | 32.99058 |
| C*                          | 72.55900 | -20.73500 | 30.62100 |
| C*                          | 67.48800 | -17.76800 | 29.31100 |
| C                           | 68.16422 | -18.66164 | 30.32438 |
| O                           | 67.32889 | -19.52389 | 30.87909 |
| O                           | 69.35209 | -18.57941 | 30.59549 |
| H                           | 69.59182 | -26.65781 | 32.30685 |
| H                           | 69.94915 | -25.52876 | 30.95901 |
| H                           | 69.01173 | -24.98054 | 32.37223 |
| H                           | 70.36277 | -25.56816 | 36.00983 |
| H                           | 69.22567 | -25.56859 | 34.66284 |
| H                           | 71.22800 | -27.86300 | 35.27896 |
| H                           | 69.49575 | -29.35226 | 34.69530 |
| H                           | 67.68809 | -26.85760 | 34.15134 |
| H                           | 67.14107 | -28.36793 | 34.91781 |
| H                           | 67.64929 | -28.37935 | 33.22540 |
| H                           | 66.41069 | -22.19637 | 33.96888 |
| H                           | 67.34025 | -23.67240 | 34.33790 |
| H                           | 66.94638 | -23.25245 | 32.64777 |
| H                           | 70.02173 | -23.01942 | 34.89509 |
| H                           | 71.59661 | -21.22392 | 33.81330 |
| H                           | 67.79744 | -20.11341 | 31.57603 |
| H                           | 70.29908 | -19.71429 | 32.24755 |
| H                           | 77.73438 | -28.14238 | 39.77278 |
| H                           | 77.28951 | -29.83488 | 39.56256 |
| H                           | 76.76460 | -28.94275 | 41.02186 |
| H                           | 76.58834 | -26.81048 | 38.16182 |
| H                           | 74.48726 | -25.97952 | 37.14702 |
| H                           | 72.20840 | -26.23257 | 37.05210 |
| H                           | 74.39210 | -29.92620 | 40.17254 |
| H                           | 72.28350 | -29.09710 | 39.13475 |
| H                           | 78.01972 | -23.98656 | 40.32604 |
| H                           | 76.70608 | -22.93711 | 40.92074 |
| H                           | 77.87526 | -22.31531 | 39.72856 |
| H                           | 75.82689 | -24.56360 | 39.24359 |
| H                           | 75.90298 | -21.68523 | 38.14245 |
| H                           | 74.79937 | -22.26262 | 39.41734 |
| H                           | 74.66399 | -22.91336 | 37.77016 |

|    |          |           |          |
|----|----------|-----------|----------|
| H  | 77.68188 | -23.21221 | 37.19923 |
| H  | 76.50214 | -24.50511 | 36.87208 |
| H  | 77.93752 | -24.84176 | 37.86071 |
| H  | 72.42388 | -19.14164 | 32.08898 |
| H  | 74.07146 | -19.47514 | 31.53956 |
| H  | 73.94648 | -21.42213 | 32.81840 |
| H  | 71.63618 | -21.27018 | 30.88782 |
| H  | 73.28659 | -21.47745 | 30.25716 |
| H  | 72.32582 | -20.04716 | 29.79279 |
| H  | 68.21985 | -17.08989 | 28.85471 |
| H  | 66.69418 | -17.18718 | 29.80732 |
| H  | 67.00317 | -18.38207 | 28.53579 |
| H  | 74.84786 | -23.79711 | 35.61071 |
| C  | 74.76481 | -23.75868 | 34.52497 |
| C  | 75.80471 | -23.25268 | 33.74225 |
| H  | 76.71816 | -22.88873 | 34.21858 |
| C  | 75.67825 | -23.21874 | 32.34533 |
| H  | 76.49631 | -22.83460 | 31.73125 |
| C  | 74.50131 | -23.66754 | 31.73693 |
| H  | 74.37807 | -23.63926 | 30.65317 |
| C* | 77.18100 | -32.61600 | 44.93300 |
| C* | 77.38500 | -34.14300 | 44.93500 |
| C* | 78.86799 | -34.55900 | 44.69100 |
| C  | 79.05830 | -36.07288 | 44.83295 |
| N  | 80.36962 | -36.51286 | 44.36631 |
| C  | 81.51681 | -36.37310 | 45.03763 |
| N  | 81.51749 | -36.12120 | 46.35616 |
| N  | 82.67231 | -36.47535 | 44.37332 |
| C* | 75.72200 | -32.17300 | 44.73700 |
| O  | 74.76940 | -32.91806 | 44.67650 |
| C* | 81.64500 | -32.53700 | 42.95900 |
| N  | 79.60753 | -31.11255 | 42.43604 |
| C  | 80.31450 | -32.30177 | 42.34800 |
| C  | 78.38737 | -31.26318 | 41.90787 |
| N  | 78.29089 | -32.52299 | 41.48217 |
| C  | 79.47209 | -33.18080 | 41.72093 |
| C* | 76.29600 | -31.58300 | 37.64700 |
| C* | 76.57100 | -32.33800 | 38.96800 |
| S  | 75.39662 | -33.59706 | 39.57720 |
| C* | 77.25800 | -32.00400 | 36.55700 |
| O  | 77.92282 | -31.14488 | 35.97407 |
| N* | 77.36100 | -33.31100 | 36.20100 |
| C* | 78.07701 | -33.82500 | 35.01000 |
| C* | 77.92100 | -35.37700 | 34.73500 |
| S  | 79.12821 | -36.54370 | 35.49450 |
| C* | 71.58700 | -37.27400 | 39.17500 |
| C* | 72.87900 | -37.29900 | 40.00900 |
| C  | 72.81521 | -36.67443 | 41.39017 |
| N  | 72.80947 | -35.21257 | 41.31213 |
| C  | 73.03790 | -34.41809 | 42.35664 |
| N  | 73.05547 | -34.92047 | 43.59499 |
| N  | 73.22897 | -33.10011 | 42.16346 |
| C* | 79.04600 | -41.17200 | 35.58000 |
| O  | 78.28520 | -41.93565 | 34.99998 |
| N* | 79.48900 | -41.34100 | 36.83400 |
| C* | 79.20900 | -42.52700 | 37.59000 |
| C* | 80.08700 | -42.37100 | 38.83000 |
| C* | 77.70900 | -42.67700 | 37.91600 |
| O  | 77.17424 | -43.77572 | 37.78037 |
| N* | 77.03399 | -41.62000 | 38.40700 |
| C* | 75.58700 | -41.60000 | 38.63700 |
| C* | 75.12400 | -40.17100 | 39.01400 |
| S  | 75.69922 | -39.60962 | 40.66426 |
| C* | 83.75900 | -40.36900 | 37.05500 |
| C* | 82.81000 | -39.35800 | 37.59000 |
| O  | 81.61981 | -39.32228 | 37.26737 |
| N* | 83.37500 | -38.47700 | 38.40900 |
| C* | 82.72300 | -37.30300 | 38.94400 |
| C* | 82.25300 | -37.60100 | 40.39600 |
| S  | 81.46683 | -36.19125 | 41.25398 |
| Fe | 76.99603 | -37.96505 | 39.85797 |
| Fe | 78.45105 | -36.80290 | 37.62856 |
| Fe | 76.90570 | -35.32123 | 39.49329 |
| Fe | 79.34439 | -36.54282 | 40.37030 |
| S  | 79.01331 | -34.83753 | 38.74569 |
| S  | 77.37305 | -36.37253 | 41.56523 |



|   |          |           |          |
|---|----------|-----------|----------|
| S | 79.09101 | -38.50952 | 39.07609 |
| S | 76.16639 | -36.88127 | 37.92931 |
| H | 77.53375 | -32.13970 | 45.86718 |
| H | 77.75862 | -32.11807 | 44.13684 |
| H | 77.02690 | -34.55627 | 45.89234 |
| H | 76.76169 | -34.59747 | 44.14650 |
| H | 79.54012 | -34.02696 | 45.38692 |
| H | 79.15461 | -34.27476 | 43.67541 |
| H | 78.89012 | -36.40540 | 45.87052 |
| H | 78.31754 | -36.60132 | 44.21667 |
| H | 80.47419 | -36.67243 | 43.35393 |
| H | 82.39109 | -36.06778 | 46.86671 |
| H | 80.67487 | -36.24526 | 46.90393 |
| H | 82.64746 | -36.48675 | 43.35010 |
| H | 75.57736 | -31.06838 | 44.64038 |
| H | 73.44578 | -32.53475 | 42.97842 |
| H | 82.02498 | -33.51707 | 42.63810 |
| H | 81.57165 | -32.53200 | 44.05941 |
| H | 82.37457 | -31.76742 | 42.66226 |
| H | 79.95811 | -30.24235 | 42.83060 |
| H | 77.63158 | -30.48951 | 41.82731 |
| H | 77.45907 | -32.95763 | 41.06183 |
| H | 79.61796 | -34.20977 | 41.42444 |
| H | 75.25652 | -31.73735 | 37.31288 |
| H | 76.44504 | -30.50561 | 37.76876 |
| H | 76.57981 | -31.56674 | 39.74936 |
| H | 77.58265 | -32.75287 | 38.92864 |
| H | 76.78840 | -33.98611 | 36.70290 |
| H | 77.68907 | -33.29026 | 34.12566 |
| H | 79.14574 | -33.56981 | 35.08967 |
| H | 78.04773 | -35.51125 | 33.65155 |
| H | 76.89827 | -35.69905 | 34.98616 |
| H | 71.74781 | -37.77840 | 38.20986 |
| H | 71.24793 | -36.24622 | 38.95746 |
| H | 70.76690 | -37.79218 | 39.69940 |
| H | 73.71351 | -36.83952 | 39.45191 |
| H | 73.18699 | -38.34315 | 40.16062 |
| H | 73.70722 | -36.98772 | 41.95987 |
| H | 71.91839 | -37.02645 | 41.93255 |
| H | 72.72757 | -34.77634 | 40.39825 |
| H | 72.81726 | -35.88759 | 43.77397 |
| H | 73.48236 | -34.38028 | 44.34203 |
| H | 73.63948 | -32.81692 | 41.27226 |
| H | 79.43608 | -40.23683 | 35.11128 |
| H | 80.20179 | -40.67621 | 37.15182 |
| H | 79.45499 | -43.43753 | 37.02147 |
| H | 79.84092 | -41.43936 | 39.36234 |
| H | 81.14758 | -42.33616 | 38.53579 |
| H | 79.95429 | -43.21291 | 39.52704 |
| H | 77.52714 | -40.73091 | 38.46507 |
| H | 75.32101 | -42.31818 | 39.43034 |
| H | 75.06566 | -41.92110 | 37.71768 |
| H | 74.02342 | -40.16808 | 39.02969 |
| H | 75.42691 | -39.47044 | 38.22420 |
| H | 83.56464 | -36.47549 | 44.85219 |
| H | 83.27753 | -41.35866 | 37.04196 |
| H | 83.98788 | -40.11500 | 36.00640 |
| H | 84.70398 | -40.43416 | 37.61303 |
| H | 84.36258 | -38.58315 | 38.61008 |
| H | 81.85122 | -37.06411 | 38.31659 |
| H | 83.13077 | -37.90171 | 40.99155 |
| H | 81.56456 | -38.45472 | 40.37318 |
| H | 83.41615 | -36.44846 | 38.92749 |

**Table S6.9 Menaquinone stacked, SQ N2[ox]**

209

|                             |          |           |          |
|-----------------------------|----------|-----------|----------|
| # E=-12300.35454245 Hartree |          |           |          |
| C                           | 71.18378 | -25.19159 | 32.74826 |
| C                           | 72.22834 | -24.60635 | 31.91971 |
| C                           | 73.47772 | -24.21878 | 32.59742 |
| C                           | 73.60405 | -24.32857 | 34.00801 |
| C                           | 72.52349 | -24.90037 | 34.81402 |
| C                           | 71.33225 | -25.33626 | 34.13050 |
| C                           | 69.90656 | -25.58204 | 32.05436 |
| C*                          | 70.21510 | -25.92740 | 34.97980 |
| C                           | 70.19778 | -27.43668 | 34.96716 |
| C                           | 69.18529 | -28.24187 | 34.60790 |
| C                           | 67.81564 | -27.84598 | 34.12992 |
| O                           | 72.09044 | -24.41751 | 30.68506 |
| O                           | 72.66575 | -24.98535 | 36.08320 |
| C*                          | 67.24000 | -22.83800 | 33.62700 |
| C                           | 69.73802 | -22.28671 | 34.04558 |
| C                           | 68.48421 | -22.01072 | 33.53845 |
| N                           | 70.54570 | -21.23716 | 33.66807 |
| N                           | 68.53841 | -20.80417 | 32.86153 |
| C                           | 69.78892 | -20.37618 | 32.95975 |
| C*                          | 76.92100 | -28.86700 | 39.93100 |
| C                           | 75.66091 | -28.41741 | 39.24024 |
| C                           | 75.67682 | -27.34061 | 38.34054 |
| C                           | 74.51132 | -26.87266 | 37.73829 |
| C                           | 73.26944 | -27.48062 | 38.02226 |
| O                           | 72.11548 | -27.04186 | 37.50657 |
| C                           | 74.42598 | -29.03719 | 39.49209 |
| C                           | 73.24782 | -28.58587 | 38.89604 |
| C*                          | 77.29700 | -23.20700 | 40.03000 |
| C*                          | 76.39200 | -23.68200 | 38.89000 |
| C*                          | 75.38300 | -22.57600 | 38.53600 |
| C*                          | 77.16700 | -24.08300 | 37.64200 |
| C                           | 73.50416 | -20.30253 | 31.73899 |
| O                           | 73.26896 | -20.96252 | 32.98576 |
| C*                          | 72.55900 | -20.73500 | 30.62100 |
| C*                          | 67.48800 | -17.76800 | 29.31100 |
| C                           | 68.09240 | -18.50832 | 30.48254 |
| O                           | 67.26816 | -19.39743 | 31.00644 |
| O                           | 69.22690 | -18.29229 | 30.87916 |
| H                           | 69.62265 | -26.62119 | 32.28151 |
| H                           | 70.01960 | -25.46465 | 30.96899 |
| H                           | 69.06973 | -24.93772 | 32.37965 |
| H                           | 70.35882 | -25.58744 | 36.01808 |
| H                           | 69.24487 | -25.52769 | 34.64906 |
| H                           | 71.13055 | -27.89753 | 35.30870 |
| H                           | 69.36088 | -29.32442 | 34.66808 |
| H                           | 67.68255 | -26.75657 | 34.06319 |
| H                           | 67.03341 | -28.24058 | 34.80333 |
| H                           | 67.60889 | -28.27028 | 33.13094 |
| H                           | 66.40930 | -22.27412 | 34.08425 |
| H                           | 67.41546 | -23.74001 | 34.23235 |
| H                           | 66.90536 | -23.15902 | 32.62569 |
| H                           | 70.11642 | -23.13413 | 34.60706 |
| H                           | 71.57215 | -21.16787 | 33.70648 |
| H                           | 67.70954 | -19.94201 | 31.76581 |
| H                           | 70.15787 | -19.46211 | 32.50062 |
| H                           | 77.59472 | -28.01937 | 40.13623 |
| H                           | 77.50595 | -29.60206 | 39.35111 |
| H                           | 76.66197 | -29.31629 | 40.90290 |
| H                           | 76.62312 | -26.84133 | 38.11655 |
| H                           | 74.52991 | -26.01869 | 37.05963 |
| H                           | 72.26978 | -26.21813 | 36.93477 |
| H                           | 74.37900 | -29.88507 | 40.18538 |
| H                           | 72.28698 | -29.06144 | 39.10853 |
| H                           | 78.02573 | -23.98330 | 40.32128 |
| H                           | 76.70717 | -22.94384 | 40.92387 |
| H                           | 77.86945 | -22.31045 | 39.73087 |
| H                           | 75.82709 | -24.56454 | 39.24191 |
| H                           | 75.90219 | -21.69091 | 38.12855 |
| H                           | 74.81032 | -22.25262 | 39.42141 |
| H                           | 74.65639 | -22.92041 | 37.78135 |

|    |          |           |          |
|----|----------|-----------|----------|
| H  | 77.68056 | -23.21136 | 37.19899 |
| H  | 76.50365 | -24.50434 | 36.87287 |
| H  | 77.93878 | -24.84014 | 37.86360 |
| H  | 73.39701 | -19.22322 | 31.93840 |
| H  | 74.55417 | -20.47193 | 31.43330 |
| H  | 73.55314 | -21.88543 | 32.88482 |
| H  | 71.52332 | -20.42258 | 30.82239 |
| H  | 72.56544 | -21.83138 | 30.49619 |
| H  | 72.87041 | -20.27544 | 29.66817 |
| H  | 68.18470 | -17.00195 | 28.94808 |
| H  | 66.53396 | -17.30570 | 29.61005 |
| H  | 67.26257 | -18.48316 | 28.50347 |
| H  | 74.85850 | -23.94155 | 35.70896 |
| C  | 74.79536 | -23.88162 | 34.62324 |
| C  | 75.84764 | -23.37891 | 33.87094 |
| H  | 76.76074 | -23.03814 | 34.36701 |
| C  | 75.73755 | -23.30840 | 32.46480 |
| H  | 76.56831 | -22.92177 | 31.86825 |
| C  | 74.56410 | -23.71954 | 31.84279 |
| H  | 74.44321 | -23.66138 | 30.75925 |
| C* | 77.18100 | -32.61600 | 44.93300 |
| C* | 77.38500 | -34.14300 | 44.93500 |
| C* | 78.86799 | -34.55900 | 44.69100 |
| C  | 79.04655 | -36.07560 | 44.82168 |
| N  | 80.34930 | -36.52732 | 44.34377 |
| C  | 81.50090 | -36.43074 | 45.01490 |
| N  | 81.51182 | -36.22584 | 46.34152 |
| N  | 82.65124 | -36.53092 | 44.34159 |
| C* | 75.72200 | -32.17300 | 44.73700 |
| O  | 74.76938 | -32.91863 | 44.68232 |
| C* | 81.64500 | -32.53700 | 42.95900 |
| N  | 79.57792 | -31.14828 | 42.45162 |
| C  | 80.31533 | -32.31718 | 42.34155 |
| C  | 78.36177 | -31.32301 | 41.92153 |
| N  | 78.29767 | -32.57589 | 41.47295 |
| C  | 79.49685 | -33.20543 | 41.69720 |
| C* | 76.29600 | -31.58300 | 37.64700 |
| C* | 76.57100 | -32.33800 | 38.96800 |
| S  | 75.40354 | -33.60230 | 39.57680 |
| C* | 77.25800 | -32.00400 | 36.55700 |
| O  | 77.93412 | -31.14865 | 35.98254 |
| N* | 77.36100 | -33.31100 | 36.20100 |
| C* | 78.07701 | -33.82500 | 35.01000 |
| C* | 77.92100 | -35.37700 | 34.73500 |
| S  | 79.12684 | -36.54759 | 35.49178 |
| C* | 71.58700 | -37.27400 | 39.17500 |
| C* | 72.87900 | -37.29900 | 40.00900 |
| C  | 72.81383 | -36.66478 | 41.38592 |
| N  | 72.81271 | -35.20323 | 41.30156 |
| C  | 73.04329 | -34.40711 | 42.34479 |
| N  | 73.05405 | -34.90798 | 43.58465 |
| N  | 73.24229 | -33.09148 | 42.15139 |
| C* | 79.04600 | -41.17200 | 35.58000 |
| O  | 78.29148 | -41.94038 | 34.99773 |
| N* | 79.48900 | -41.34100 | 36.83400 |
| C* | 79.20900 | -42.52700 | 37.59000 |
| C* | 80.08700 | -42.37100 | 38.83000 |
| C* | 77.70900 | -42.67700 | 37.91600 |
| O  | 77.17578 | -43.77724 | 37.78408 |
| N* | 77.03399 | -41.62000 | 38.40700 |
| C* | 75.58700 | -41.60000 | 38.63700 |
| C* | 75.12400 | -40.17100 | 39.01400 |
| S  | 75.69384 | -39.61236 | 40.66680 |
| C* | 83.75900 | -40.36900 | 37.05500 |
| C* | 82.81000 | -39.35800 | 37.59000 |
| O  | 81.62018 | -39.32276 | 37.26675 |
| N* | 83.37500 | -38.47700 | 38.40900 |
| C* | 82.72300 | -37.30300 | 38.94400 |
| C* | 82.25300 | -37.60100 | 40.39600 |
| S  | 81.47048 | -36.18493 | 41.24474 |
| Fe | 76.99411 | -37.97127 | 39.85520 |
| Fe | 78.44734 | -36.81344 | 37.62220 |
| Fe | 76.90290 | -35.32835 | 39.48000 |
| Fe | 79.34023 | -36.55045 | 40.37345 |
| S  | 79.01183 | -34.85103 | 38.73683 |
| S  | 77.36598 | -36.37388 | 41.55907 |

|   |          |           |          |
|---|----------|-----------|----------|
| S | 79.08950 | -38.51777 | 39.07374 |
| S | 76.16418 | -36.89174 | 37.92313 |
| H | 77.53204 | -32.14034 | 45.86825 |
| H | 77.75985 | -32.11758 | 44.13908 |
| H | 77.02602 | -34.55730 | 45.89158 |
| H | 76.76255 | -34.59648 | 44.14517 |
| H | 79.54053 | -34.03636 | 45.39359 |
| H | 79.15818 | -34.26740 | 43.67807 |
| H | 78.88091 | -36.41309 | 45.85785 |
| H | 78.29630 | -36.59176 | 44.20634 |
| H | 80.44960 | -36.66306 | 43.32736 |
| H | 82.38889 | -36.19309 | 46.84754 |
| H | 80.66997 | -36.35230 | 46.88972 |
| H | 82.61826 | -36.50455 | 43.31776 |
| H | 75.57717 | -31.06901 | 44.63550 |
| H | 73.45281 | -32.52271 | 42.96530 |
| H | 82.04250 | -33.50791 | 42.63160 |
| H | 81.56356 | -32.54329 | 44.05884 |
| H | 82.36492 | -31.75338 | 42.67533 |
| H | 79.90394 | -30.27577 | 42.86174 |
| H | 77.58481 | -30.56941 | 41.85408 |
| H | 77.47331 | -33.02309 | 41.04953 |
| H | 79.67467 | -34.22279 | 41.37953 |
| H | 75.25668 | -31.73843 | 37.31241 |
| H | 76.43862 | -30.50568 | 37.77168 |
| H | 76.58256 | -31.56282 | 39.74646 |
| H | 77.58298 | -32.75163 | 38.92710 |
| H | 76.76760 | -33.98039 | 36.68597 |
| H | 77.68944 | -33.29207 | 34.12436 |
| H | 79.14540 | -33.56876 | 35.08997 |
| H | 78.04740 | -35.51117 | 33.65151 |
| H | 76.89836 | -35.69930 | 34.98605 |
| H | 71.74410 | -37.78818 | 38.21439 |
| H | 71.25442 | -36.24627 | 38.94808 |
| H | 70.76400 | -37.78227 | 39.70463 |
| H | 73.71546 | -36.84600 | 39.44967 |
| H | 73.18281 | -38.34326 | 40.16856 |
| H | 73.70292 | -36.97860 | 41.96006 |
| H | 71.91415 | -37.01096 | 41.92743 |
| H | 72.73922 | -34.76946 | 40.38562 |
| H | 72.81904 | -35.87610 | 43.76142 |
| H | 73.48914 | -34.37152 | 44.32985 |
| H | 73.64512 | -32.80581 | 41.25751 |
| H | 79.43012 | -40.23341 | 35.11343 |
| H | 80.19695 | -40.67249 | 37.15470 |
| H | 79.45499 | -43.43738 | 37.02120 |
| H | 79.84035 | -41.43965 | 39.36249 |
| H | 81.14750 | -42.33530 | 38.53563 |
| H | 79.95461 | -43.21328 | 39.52673 |
| H | 77.52609 | -40.72987 | 38.46098 |
| H | 75.32138 | -42.31828 | 39.43038 |
| H | 75.06591 | -41.92143 | 37.71758 |
| H | 74.02333 | -40.16710 | 39.02545 |
| H | 75.42936 | -39.47056 | 38.22509 |
| H | 83.54527 | -36.57195 | 44.81530 |
| H | 83.27303 | -41.35614 | 37.02947 |
| H | 83.99901 | -40.10708 | 36.01082 |
| H | 84.69862 | -40.44294 | 37.62112 |
| H | 84.36283 | -38.58249 | 38.60908 |
| H | 81.85094 | -37.06392 | 38.31708 |
| H | 83.13015 | -37.90259 | 40.99220 |
| H | 81.56251 | -38.45315 | 40.37339 |
| H | 83.41606 | -36.44842 | 38.92762 |

Table S6.10 Menaquinone H-bonded, Q N2[red]

209

# E=-12300.34920984 Hartree

|    |          |           |          |
|----|----------|-----------|----------|
| C  | 71.88279 | -25.40094 | 35.51943 |
| C  | 71.47714 | -25.03232 | 36.91019 |
| C  | 71.67233 | -23.63491 | 37.37539 |
| C  | 72.24438 | -22.67970 | 36.51499 |
| C  | 72.62637 | -23.06134 | 35.13065 |
| C  | 72.40641 | -24.46360 | 34.67483 |
| C  | 71.61748 | -26.81144 | 35.07812 |
| C* | 72.67300 | -24.74800 | 33.21300 |
| C  | 71.38624 | -24.59532 | 32.42500 |
| C  | 70.78482 | -25.52154 | 31.66316 |
| C  | 71.23497 | -26.92611 | 31.38485 |
| O  | 70.98625 | -25.86516 | 37.66946 |
| O  | 73.08315 | -22.21083 | 34.36995 |
| C* | 67.24000 | -22.83800 | 33.62700 |
| C  | 69.50430 | -21.95758 | 34.52044 |
| C  | 68.45306 | -21.96329 | 33.62768 |
| N  | 70.36652 | -20.97134 | 34.08363 |
| N  | 68.68275 | -20.99463 | 32.66823 |
| C  | 69.83813 | -20.42294 | 32.96734 |
| C* | 76.92100 | -28.86700 | 39.93100 |
| C  | 75.47648 | -28.75300 | 39.51729 |
| C  | 75.04313 | -27.71103 | 38.68562 |
| C  | 73.70729 | -27.59523 | 38.29432 |
| C  | 72.75586 | -28.53261 | 38.73011 |
| O  | 71.44673 | -28.47043 | 38.38721 |
| C  | 74.51431 | -29.68744 | 39.93989 |
| C  | 73.17827 | -29.59061 | 39.55428 |
| C* | 77.29700 | -23.20700 | 40.03000 |
| C* | 76.39200 | -23.68200 | 38.89000 |
| C* | 75.38300 | -22.57600 | 38.53600 |
| C* | 77.16700 | -24.08300 | 37.64200 |
| C  | 73.60256 | -20.36437 | 31.66891 |
| O  | 74.42977 | -21.45900 | 32.03037 |
| C* | 72.55900 | -20.73500 | 30.62100 |
| C* | 67.48800 | -17.76800 | 29.31100 |
| C  | 68.19043 | -18.68866 | 30.28401 |
| O  | 67.39605 | -19.63933 | 30.74935 |
| O  | 69.35974 | -18.55232 | 30.60776 |
| H  | 70.79037 | -26.82644 | 34.34790 |
| H  | 71.34750 | -27.45911 | 35.91903 |
| H  | 72.49640 | -27.24145 | 34.57506 |
| H  | 73.40115 | -24.01760 | 32.82896 |
| H  | 73.10814 | -25.74804 | 33.08843 |
| H  | 70.91113 | -23.61139 | 32.51538 |
| H  | 69.85398 | -25.22091 | 31.16499 |
| H  | 72.16292 | -27.19742 | 31.90864 |
| H  | 71.40391 | -27.07110 | 30.30326 |
| H  | 70.45472 | -27.65135 | 31.67573 |
| H  | 66.31732 | -22.24125 | 33.72153 |
| H  | 67.27453 | -23.55530 | 34.46008 |
| H  | 67.16620 | -23.40608 | 32.68470 |
| H  | 69.69323 | -22.54895 | 35.41101 |
| H  | 71.27027 | -20.73870 | 34.48100 |
| H  | 67.87298 | -20.21608 | 31.44647 |
| H  | 70.29434 | -19.61824 | 32.39438 |
| H  | 77.50648 | -28.00626 | 39.57391 |
| H  | 77.40941 | -29.76887 | 39.53193 |
| H  | 77.01823 | -28.87876 | 41.03118 |
| H  | 75.76507 | -26.97157 | 38.32639 |
| H  | 73.40637 | -26.77772 | 37.64007 |
| H  | 71.22424 | -27.57916 | 38.04685 |
| H  | 74.81232 | -30.51882 | 40.58596 |
| H  | 72.44043 | -30.32369 | 39.88886 |
| H  | 78.02405 | -23.98338 | 40.32331 |
| H  | 76.70766 | -22.94040 | 40.92306 |
| H  | 77.87009 | -22.31280 | 39.72665 |
| H  | 75.82341 | -24.56352 | 39.24437 |
| H  | 75.90503 | -21.67408 | 38.17146 |
| H  | 74.77190 | -22.28352 | 39.40551 |
| H  | 74.69359 | -22.90145 | 37.74251 |
| H  | 77.73781 | -23.22733 | 37.24053 |

|    |          |           |          |
|----|----------|-----------|----------|
| H  | 76.48905 | -24.43284 | 36.84537 |
| H  | 77.88640 | -24.89421 | 37.84786 |
| H  | 73.10231 | -19.94135 | 32.56355 |
| H  | 74.25561 | -19.56492 | 31.27291 |
| H  | 74.04092 | -21.86347 | 32.82185 |
| H  | 71.89341 | -21.52699 | 31.00483 |
| H  | 73.04851 | -21.11752 | 29.71072 |
| H  | 71.93054 | -19.86989 | 30.35113 |
| H  | 68.19565 | -17.03280 | 28.90814 |
| H  | 66.66342 | -17.25244 | 29.82894 |
| H  | 67.04116 | -18.35576 | 28.49388 |
| H  | 70.86449 | -24.02660 | 39.33084 |
| C  | 71.30235 | -23.27100 | 38.67624 |
| C  | 71.49756 | -21.95788 | 39.11499 |
| H  | 71.20548 | -21.67441 | 40.12893 |
| C  | 72.07213 | -21.00873 | 38.26075 |
| H  | 72.23455 | -19.98585 | 38.60834 |
| C  | 72.45016 | -21.36959 | 36.96483 |
| H  | 72.92396 | -20.64631 | 36.29839 |
| C* | 77.18100 | -32.61600 | 44.93300 |
| C* | 77.38500 | -34.14300 | 44.93500 |
| C* | 78.86799 | -34.55900 | 44.69100 |
| C  | 79.03701 | -36.07865 | 44.79521 |
| N  | 80.34012 | -36.52530 | 44.31573 |
| C  | 81.49025 | -36.39650 | 44.98108 |
| N  | 81.49652 | -36.16311 | 46.30628 |
| N  | 82.64081 | -36.48898 | 44.30843 |
| C* | 75.72200 | -32.17300 | 44.73700 |
| O  | 74.77332 | -32.92020 | 44.65061 |
| C* | 81.64500 | -32.53700 | 42.95900 |
| N  | 79.54477 | -31.20304 | 42.39046 |
| C  | 80.31186 | -32.35789 | 42.33167 |
| C  | 78.33297 | -31.43457 | 41.86532 |
| N  | 78.30457 | -32.70603 | 41.47088 |
| C  | 79.51720 | -33.29152 | 41.72442 |
| C* | 76.29600 | -31.58300 | 37.64700 |
| C* | 76.57100 | -32.33800 | 38.96800 |
| S  | 75.39403 | -33.59416 | 39.55068 |
| C* | 77.25800 | -32.00400 | 36.55700 |
| O  | 77.90179 | -31.13798 | 35.95499 |
| N* | 77.36100 | -33.31100 | 36.20100 |
| C* | 78.07701 | -33.82500 | 35.01000 |
| C* | 77.92100 | -35.37700 | 34.73500 |
| S  | 79.19460 | -36.53250 | 35.39453 |
| C* | 71.58700 | -37.27400 | 39.17500 |
| C* | 72.87900 | -37.29900 | 40.00900 |
| C  | 72.83420 | -36.61545 | 41.36304 |
| N  | 72.85791 | -35.15573 | 41.22426 |
| C  | 73.02707 | -34.32276 | 42.24959 |
| N  | 72.87373 | -34.75745 | 43.50647 |
| N  | 73.31914 | -33.02861 | 42.01509 |
| C* | 79.04600 | -41.17200 | 35.58000 |
| O  | 78.32161 | -41.96006 | 34.98288 |
| N* | 79.48900 | -41.34100 | 36.83400 |
| C* | 79.20900 | -42.52700 | 37.59000 |
| C* | 80.08700 | -42.37100 | 38.83000 |
| C* | 77.70900 | -42.67700 | 37.91600 |
| O  | 77.17259 | -43.77573 | 37.76727 |
| N* | 77.03399 | -41.62000 | 38.40700 |
| C* | 75.58700 | -41.60000 | 38.63700 |
| C* | 75.12400 | -40.17100 | 39.01400 |
| S  | 75.63268 | -39.62826 | 40.69188 |
| C* | 83.75900 | -40.36900 | 37.05500 |
| C* | 82.81000 | -39.35800 | 37.59000 |
| O  | 81.62605 | -39.31826 | 37.25228 |
| N* | 83.37500 | -38.47700 | 38.40900 |
| C* | 82.72300 | -37.30300 | 38.94400 |
| C* | 82.25300 | -37.60100 | 40.39600 |
| S  | 81.47074 | -36.20967 | 41.26789 |
| Fe | 76.97817 | -37.95663 | 39.90644 |
| Fe | 78.45007 | -36.92938 | 37.52495 |
| Fe | 76.90214 | -35.37965 | 39.46789 |
| Fe | 79.32483 | -36.50481 | 40.38559 |
| S  | 79.00577 | -34.85137 | 38.75673 |
| S  | 77.29306 | -36.32756 | 41.60865 |
| S  | 79.06605 | -38.57319 | 39.22844 |

|   |          |           |          |
|---|----------|-----------|----------|
| S | 76.10959 | -36.94324 | 37.95005 |
| H | 77.53592 | -32.13716 | 45.86523 |
| H | 77.75602 | -32.11921 | 44.13447 |
| H | 77.02395 | -34.55764 | 45.89098 |
| H | 76.76714 | -34.59517 | 44.14118 |
| H | 79.54099 | -34.04874 | 45.40272 |
| H | 79.15956 | -34.25703 | 43.68356 |
| H | 78.86252 | -36.43621 | 45.82411 |
| H | 78.29010 | -36.57365 | 44.15846 |
| H | 80.44009 | -36.66192 | 43.29539 |
| H | 82.37257 | -36.13660 | 46.81385 |
| H | 80.65637 | -36.30829 | 46.85250 |
| H | 82.59378 | -36.46741 | 43.27944 |
| H | 75.57545 | -31.06586 | 44.66285 |
| H | 73.50632 | -32.44860 | 42.82661 |
| H | 82.05137 | -33.51494 | 42.66347 |
| H | 81.56423 | -32.50784 | 44.05873 |
| H | 82.35716 | -31.75626 | 42.64836 |
| H | 79.84710 | -30.30644 | 42.76312 |
| H | 77.53522 | -30.70729 | 41.76791 |
| H | 77.50030 | -33.20178 | 41.05748 |
| H | 79.72163 | -34.31980 | 41.46067 |
| H | 75.25764 | -31.74097 | 37.31197 |
| H | 76.44260 | -30.50504 | 37.76563 |
| H | 76.61003 | -31.57244 | 39.75242 |
| H | 77.57206 | -32.78084 | 38.91688 |
| H | 76.86761 | -34.00389 | 36.76048 |
| H | 77.69091 | -33.27638 | 34.13297 |
| H | 79.14753 | -33.57454 | 35.09120 |
| H | 77.94833 | -35.49407 | 33.64168 |
| H | 76.92188 | -35.70403 | 35.06595 |
| H | 71.73767 | -37.81271 | 38.22677 |
| H | 71.27091 | -36.24612 | 38.92509 |
| H | 70.75462 | -37.75733 | 39.71428 |
| H | 73.72685 | -36.89000 | 39.43298 |
| H | 73.16590 | -38.34213 | 40.20464 |
| H | 73.71987 | -36.92697 | 41.94415 |
| H | 71.92721 | -36.91862 | 41.91770 |
| H | 72.96355 | -34.76756 | 40.29000 |
| H | 72.62582 | -35.72056 | 43.69401 |
| H | 73.28756 | -34.21783 | 44.26092 |
| H | 73.88596 | -32.85034 | 41.17286 |
| H | 79.40163 | -40.21603 | 35.12681 |
| H | 80.14993 | -40.63916 | 37.18238 |
| H | 79.45404 | -43.43566 | 37.01818 |
| H | 79.84333 | -41.43550 | 39.35676 |
| H | 81.14770 | -42.33938 | 38.53530 |
| H | 79.95085 | -43.21104 | 39.52924 |
| H | 77.53553 | -40.73791 | 38.51759 |
| H | 75.31848 | -42.32046 | 39.42832 |
| H | 75.07262 | -41.92421 | 37.71428 |
| H | 74.02290 | -40.15838 | 38.97735 |
| H | 75.46598 | -39.46382 | 38.24693 |
| H | 83.53600 | -36.48307 | 44.78091 |
| H | 83.25595 | -41.34473 | 36.97900 |
| H | 84.04319 | -40.07595 | 36.03030 |
| H | 84.67652 | -40.48065 | 37.65154 |
| H | 84.35709 | -38.59564 | 38.62791 |
| H | 81.84784 | -37.06686 | 38.31998 |
| H | 83.13239 | -37.92319 | 40.98096 |
| H | 81.54950 | -38.44210 | 40.35813 |
| H | 83.41674 | -36.44814 | 38.92376 |

**Table S6.11 Menaquinone H-bonded, Q N2[ox]**

209

# E=-12300.21290903 Hartree

|    |          |           |          |
|----|----------|-----------|----------|
| C  | 71.88086 | -25.38726 | 35.52222 |
| C  | 71.47429 | -25.01090 | 36.91003 |
| C  | 71.67649 | -23.61367 | 37.37090 |
| C  | 72.25168 | -22.66356 | 36.50675 |
| C  | 72.63174 | -23.05153 | 35.12374 |
| C  | 72.40780 | -24.45568 | 34.67345 |
| C  | 71.60964 | -26.79811 | 35.08481 |
| C* | 72.67300 | -24.74800 | 33.21300 |
| C  | 71.38549 | -24.59902 | 32.42530 |
| C  | 70.78598 | -25.52736 | 31.66449 |
| C  | 71.23901 | -26.93117 | 31.38745 |
| O  | 70.97526 | -25.83871 | 37.67090 |
| O  | 73.09032 | -22.20613 | 34.35925 |
| C* | 67.24000 | -22.83800 | 33.62700 |
| C  | 69.50505 | -21.95804 | 34.52037 |
| C  | 68.45249 | -21.96261 | 33.62908 |
| N  | 70.36470 | -20.96837 | 34.08586 |
| N  | 68.67906 | -20.99005 | 32.67296 |
| C  | 69.83339 | -20.41699 | 32.97228 |
| C* | 76.92100 | -28.86700 | 39.93100 |
| C  | 75.48001 | -28.74081 | 39.50615 |
| C  | 75.05452 | -27.68475 | 38.68822 |
| C  | 73.72089 | -27.55826 | 38.29169 |
| C  | 72.76341 | -28.49831 | 38.70924 |
| O  | 71.45791 | -28.43247 | 38.36083 |
| C  | 74.51180 | -29.67690 | 39.91224 |
| C  | 73.17828 | -29.56853 | 39.52212 |
| C* | 77.29700 | -23.20700 | 40.03000 |
| C* | 76.39200 | -23.68200 | 38.89000 |
| C* | 75.38300 | -22.57600 | 38.53600 |
| C* | 77.16700 | -24.08300 | 37.64200 |
| C  | 73.61004 | -20.36689 | 31.66200 |
| O  | 74.43602 | -21.46453 | 32.01910 |
| C* | 72.55900 | -20.73500 | 30.62100 |
| C* | 67.48800 | -17.76800 | 29.31100 |
| C  | 68.18760 | -18.68649 | 30.28728 |
| O  | 67.39095 | -19.63460 | 30.75443 |
| O  | 69.35678 | -18.55169 | 30.61242 |
| H  | 70.77776 | -26.81213 | 34.36007 |
| H  | 71.34331 | -27.44452 | 35.92765 |
| H  | 72.48402 | -27.23036 | 34.57599 |
| H  | 73.40081 | -24.01968 | 32.82425 |
| H  | 73.10774 | -25.74886 | 33.09354 |
| H  | 70.90881 | -23.61576 | 32.51392 |
| H  | 69.85490 | -25.22903 | 31.16557 |
| H  | 72.16747 | -27.20012 | 31.91177 |
| H  | 71.40872 | -27.07632 | 30.30599 |
| H  | 70.45988 | -27.65771 | 31.67815 |
| H  | 66.31791 | -22.24330 | 33.73878 |
| H  | 67.28238 | -23.56723 | 34.44935 |
| H  | 67.15763 | -23.39198 | 32.67713 |
| H  | 69.69551 | -22.55133 | 35.40931 |
| H  | 71.26679 | -20.73180 | 34.48433 |
| H  | 67.86707 | -20.21057 | 31.45162 |
| H  | 70.28702 | -19.60949 | 32.40110 |
| H  | 77.51987 | -28.01638 | 39.57226 |
| H  | 77.40467 | -29.77742 | 39.54560 |
| H  | 77.00347 | -28.86326 | 41.03205 |
| H  | 75.78044 | -26.94198 | 38.34464 |
| H  | 73.42649 | -26.72964 | 37.64830 |
| H  | 71.23053 | -27.53554 | 38.03433 |
| H  | 74.80254 | -30.51476 | 40.55413 |
| H  | 72.43177 | -30.29848 | 39.84429 |
| H  | 78.02413 | -23.98336 | 40.32357 |
| H  | 76.70762 | -22.93998 | 40.92285 |
| H  | 77.87019 | -22.31301 | 39.72662 |
| H  | 75.82308 | -24.56323 | 39.24490 |
| H  | 75.90503 | -21.67416 | 38.17163 |
| H  | 74.77215 | -22.28354 | 39.40560 |
| H  | 74.69351 | -22.90126 | 37.74248 |
| H  | 77.73714 | -23.22718 | 37.24022 |



|    |          |           |          |
|----|----------|-----------|----------|
| H  | 76.48918 | -24.43317 | 36.84533 |
| H  | 77.88745 | -24.89347 | 37.84796 |
| H  | 73.11666 | -19.94230 | 32.55964 |
| H  | 74.26340 | -19.56992 | 31.26183 |
| H  | 74.04958 | -21.86633 | 32.81282 |
| H  | 71.89173 | -21.52306 | 31.01007 |
| H  | 73.04184 | -21.12155 | 29.70886 |
| H  | 71.93301 | -19.86770 | 30.35251 |
| H  | 68.19652 | -17.03364 | 28.90818 |
| H  | 66.66195 | -17.25142 | 29.82552 |
| H  | 67.04326 | -18.35757 | 28.49402 |
| H  | 70.86829 | -23.99484 | 39.32866 |
| C  | 71.30935 | -23.24371 | 38.67110 |
| C  | 71.51057 | -21.93010 | 39.10536 |
| H  | 71.22072 | -21.64184 | 40.11858 |
| C  | 72.08730 | -20.98586 | 38.24697 |
| H  | 72.25320 | -19.96224 | 38.59057 |
| C  | 72.46271 | -21.35264 | 36.95189 |
| H  | 72.93796 | -20.63295 | 36.28254 |
| C* | 77.18100 | -32.61600 | 44.93300 |
| C* | 77.38500 | -34.14300 | 44.93500 |
| C* | 78.86799 | -34.55900 | 44.69100 |
| C  | 79.05808 | -36.07301 | 44.83246 |
| N  | 80.36938 | -36.51321 | 44.36594 |
| C  | 81.51663 | -36.37276 | 45.03712 |
| N  | 81.51721 | -36.12024 | 46.35554 |
| N  | 82.67210 | -36.47497 | 44.37283 |
| C* | 75.72200 | -32.17300 | 44.73700 |
| O  | 74.76915 | -32.91768 | 44.67628 |
| C* | 81.64500 | -32.53700 | 42.95900 |
| N  | 79.60773 | -31.11503 | 42.43238 |
| C  | 80.31349 | -32.30501 | 42.34950 |
| C  | 78.38896 | -31.26609 | 41.90153 |
| N  | 78.29132 | -32.52716 | 41.48069 |
| C  | 79.47095 | -33.18566 | 41.72435 |
| C* | 76.29600 | -31.58300 | 37.64700 |
| C* | 76.57100 | -32.33800 | 38.96800 |
| S  | 75.39453 | -33.58966 | 39.58351 |
| C* | 77.25800 | -32.00400 | 36.55700 |
| O  | 77.92190 | -31.14445 | 35.97348 |
| N* | 77.36100 | -33.31100 | 36.20100 |
| C* | 78.07701 | -33.82500 | 35.01000 |
| C* | 77.92100 | -35.37700 | 34.73500 |
| S  | 79.12676 | -36.54362 | 35.49665 |
| C* | 71.58700 | -37.27400 | 39.17500 |
| C* | 72.87900 | -37.29900 | 40.00900 |
| C  | 72.81542 | -36.66914 | 41.38771 |
| N  | 72.81097 | -35.20687 | 41.30506 |
| C  | 73.03842 | -34.41000 | 42.34770 |
| N  | 73.05492 | -34.91016 | 43.58660 |
| N  | 73.22874 | -33.09105 | 42.15188 |
| C* | 79.04600 | -41.17200 | 35.58000 |
| O  | 78.28513 | -41.93562 | 35.00006 |
| N* | 79.48900 | -41.34100 | 36.83400 |
| C* | 79.20900 | -42.52700 | 37.59000 |
| C* | 80.08700 | -42.37100 | 38.83000 |
| C* | 77.70900 | -42.67700 | 37.91600 |
| O  | 77.17423 | -43.77572 | 37.78044 |
| N* | 77.03399 | -41.62000 | 38.40700 |
| C* | 75.58700 | -41.60000 | 38.63700 |
| C* | 75.12400 | -40.17100 | 39.01400 |
| S  | 75.69839 | -39.60924 | 40.66444 |
| C* | 83.75900 | -40.36900 | 37.05500 |
| C* | 82.81000 | -39.35800 | 37.59000 |
| O  | 81.61971 | -39.32229 | 37.26762 |
| N* | 83.37500 | -38.47700 | 38.40900 |
| C* | 82.72300 | -37.30300 | 38.94400 |
| C* | 82.25300 | -37.60100 | 40.39600 |
| S  | 81.46635 | -36.19154 | 41.25409 |
| Fe | 76.99359 | -37.96308 | 39.85919 |
| Fe | 78.44814 | -36.80112 | 37.63034 |
| Fe | 76.90266 | -35.31890 | 39.49601 |
| Fe | 79.34294 | -36.54254 | 40.37219 |
| S  | 79.01139 | -34.83709 | 38.74802 |
| S  | 77.37099 | -36.37132 | 41.56687 |
| S  | 79.08830 | -38.50825 | 39.07707 |

|   |          |           |          |
|---|----------|-----------|----------|
| S | 76.16326 | -36.87800 | 37.93154 |
| H | 77.53414 | -32.13936 | 45.86684 |
| H | 77.75829 | -32.11835 | 44.13630 |
| H | 77.02690 | -34.55634 | 45.89231 |
| H | 76.76169 | -34.59739 | 44.14645 |
| H | 79.54000 | -34.02734 | 45.38734 |
| H | 79.15479 | -34.27446 | 43.67576 |
| H | 78.88962 | -36.40592 | 45.86987 |
| H | 78.31732 | -36.60105 | 44.21587 |
| H | 80.47402 | -36.67289 | 43.35358 |
| H | 82.39080 | -36.06689 | 46.86612 |
| H | 80.67460 | -36.24449 | 46.90329 |
| H | 82.64721 | -36.48660 | 43.34959 |
| H | 75.57753 | -31.06826 | 44.64022 |
| H | 73.44430 | -32.52523 | 42.96693 |
| H | 82.02541 | -33.51700 | 42.63818 |
| H | 81.57273 | -32.53179 | 44.05954 |
| H | 82.37366 | -31.76707 | 42.66126 |
| H | 79.95894 | -30.24446 | 42.82550 |
| H | 77.63381 | -30.49301 | 41.81687 |
| H | 77.45966 | -32.96079 | 41.05905 |
| H | 79.61638 | -34.21503 | 41.42945 |
| H | 75.25620 | -31.73500 | 37.31349 |
| H | 76.44632 | -30.50651 | 37.77102 |
| H | 76.60130 | -31.56531 | 39.74581 |
| H | 77.57776 | -32.76367 | 38.92019 |
| H | 76.78927 | -33.98624 | 36.70366 |
| H | 77.68906 | -33.29030 | 34.12567 |
| H | 79.14573 | -33.56978 | 35.08965 |
| H | 78.04896 | -35.51154 | 33.65174 |
| H | 76.89791 | -35.69872 | 34.98516 |
| H | 71.74751 | -37.77915 | 38.21021 |
| H | 71.24850 | -36.24621 | 38.95676 |
| H | 70.76666 | -37.79139 | 39.69979 |
| H | 73.71381 | -36.84163 | 39.45067 |
| H | 73.18610 | -38.34292 | 40.16376 |
| H | 73.70695 | -36.98095 | 41.95895 |
| H | 71.91799 | -37.01813 | 41.93093 |
| H | 72.72813 | -34.77328 | 40.38995 |
| H | 72.81736 | -35.87738 | 43.76620 |
| H | 73.48143 | -34.36955 | 44.33365 |
| H | 73.65145 | -32.81260 | 41.26444 |
| H | 79.43612 | -40.23688 | 35.11123 |
| H | 80.20192 | -40.67630 | 37.15176 |
| H | 79.45500 | -43.43754 | 37.02149 |
| H | 79.84090 | -41.43937 | 39.36236 |
| H | 81.14757 | -42.33612 | 38.53578 |
| H | 79.95431 | -43.21292 | 39.52703 |
| H | 77.52709 | -40.73088 | 38.46490 |
| H | 75.32099 | -42.31819 | 39.43032 |
| H | 75.06560 | -41.92100 | 37.71768 |
| H | 74.02341 | -40.16809 | 39.02943 |
| H | 75.42700 | -39.47048 | 38.22418 |
| H | 83.56447 | -36.47427 | 44.85162 |
| H | 83.27762 | -41.35871 | 37.04217 |
| H | 83.98770 | -40.11514 | 36.00632 |
| H | 84.70406 | -40.43397 | 37.61291 |
| H | 84.36264 | -38.58301 | 38.60990 |
| H | 81.85124 | -37.06408 | 38.31658 |
| H | 83.13074 | -37.90155 | 40.99165 |
| H | 81.56464 | -38.45480 | 40.37317 |
| H | 83.41617 | -36.44847 | 38.92751 |

**Table S6.12 Menaquinone H-bonded, SQ N2[ox]**

209

# E=-12300.36377795 Hartree

|    |          |           |          |
|----|----------|-----------|----------|
| C  | 71.90200 | -25.40371 | 35.54548 |
| C  | 71.52424 | -25.07549 | 36.90467 |
| C  | 71.73934 | -23.69957 | 37.36580 |
| C  | 72.29077 | -22.72680 | 36.49466 |
| C  | 72.65637 | -23.08147 | 35.12074 |
| C  | 72.43040 | -24.43779 | 34.68229 |
| C  | 71.65125 | -26.81104 | 35.06521 |
| C* | 72.67300 | -24.74800 | 33.21300 |
| C  | 71.40024 | -24.64393 | 32.40343 |
| C  | 70.82246 | -25.58527 | 31.64112 |
| C  | 71.29394 | -26.99061 | 31.39336 |
| O  | 71.01396 | -25.92334 | 37.70302 |
| O  | 73.08189 | -22.16477 | 34.34048 |
| C* | 67.24000 | -22.83800 | 33.62700 |
| C  | 69.63873 | -22.18810 | 34.29871 |
| C  | 68.48337 | -22.01202 | 33.57124 |
| N  | 70.51925 | -21.22025 | 33.86566 |
| N  | 68.66271 | -20.94409 | 32.70884 |
| C  | 69.89738 | -20.50187 | 32.90778 |
| C* | 76.92100 | -28.86700 | 39.93100 |
| C  | 75.48422 | -28.73892 | 39.49480 |
| C  | 75.07113 | -27.67923 | 38.67249 |
| C  | 73.74207 | -27.53252 | 38.27407 |
| C  | 72.76668 | -28.46244 | 38.68829 |
| O  | 71.47398 | -28.36591 | 38.34412 |
| C  | 74.50469 | -29.66318 | 39.89868 |
| C  | 73.17361 | -29.54026 | 39.50160 |
| C* | 77.29700 | -23.20700 | 40.03000 |
| C* | 76.39200 | -23.68200 | 38.89000 |
| C* | 75.38300 | -22.57600 | 38.53600 |
| C* | 77.16700 | -24.08300 | 37.64200 |
| C  | 73.60109 | -20.40416 | 31.68664 |
| O  | 74.36906 | -21.52702 | 32.07088 |
| C* | 72.55900 | -20.73500 | 30.62100 |
| C* | 67.48800 | -17.76800 | 29.31100 |
| C  | 68.17758 | -18.63668 | 30.34287 |
| O  | 67.37297 | -19.54540 | 30.86338 |
| O  | 69.35022 | -18.49251 | 30.65211 |
| H  | 70.88514 | -26.82505 | 34.27202 |
| H  | 71.31391 | -27.45568 | 35.88481 |
| H  | 72.56124 | -27.25782 | 34.63208 |
| H  | 73.37562 | -24.00042 | 32.81230 |
| H  | 73.14097 | -25.73538 | 33.09418 |
| H  | 70.90654 | -23.66860 | 32.46920 |
| H  | 69.89356 | -25.30664 | 31.12562 |
| H  | 72.21261 | -27.23785 | 31.94480 |
| H  | 71.48971 | -27.15661 | 30.31857 |
| H  | 70.51879 | -27.72230 | 31.68400 |
| H  | 66.35290 | -22.22574 | 33.86337 |
| H  | 67.33197 | -23.62204 | 34.39297 |
| H  | 67.04631 | -23.32812 | 32.65737 |
| H  | 69.90320 | -22.92183 | 35.05351 |
| H  | 71.52266 | -21.20650 | 34.09593 |
| H  | 67.85051 | -20.11945 | 31.58000 |
| H  | 70.34726 | -19.67644 | 32.36101 |
| H  | 77.52682 | -28.02934 | 39.55325 |
| H  | 77.40570 | -29.78871 | 39.57221 |
| H  | 77.00533 | -28.83830 | 41.03304 |
| H  | 75.80682 | -26.94387 | 38.33238 |
| H  | 73.45297 | -26.69531 | 37.63924 |
| H  | 71.27163 | -27.43884 | 38.00050 |
| H  | 74.78409 | -30.50120 | 40.54698 |
| H  | 72.41761 | -30.26116 | 39.82375 |
| H  | 78.02649 | -23.98157 | 40.32471 |
| H  | 76.70690 | -22.94041 | 40.92271 |
| H  | 77.86831 | -22.31131 | 39.72693 |
| H  | 75.82321 | -24.56357 | 39.24364 |
| H  | 75.90679 | -21.67468 | 38.17170 |
| H  | 74.77227 | -22.28308 | 39.40505 |
| H  | 74.68929 | -22.89897 | 37.74656 |
| H  | 77.73770 | -23.22679 | 37.24102 |

|    |          |           |          |
|----|----------|-----------|----------|
| H  | 76.48663 | -24.42932 | 36.84642 |
| H  | 77.88685 | -24.89516 | 37.84627 |
| H  | 73.10146 | -19.95089 | 32.56710 |
| H  | 74.28866 | -19.62966 | 31.29431 |
| H  | 73.96045 | -21.88956 | 32.88683 |
| H  | 71.86328 | -21.50425 | 30.99552 |
| H  | 73.04881 | -21.13552 | 29.71806 |
| H  | 71.96510 | -19.84856 | 30.34143 |
| H  | 68.19801 | -17.04535 | 28.88956 |
| H  | 66.64418 | -17.23850 | 29.78162 |
| H  | 67.06937 | -18.39994 | 28.51173 |
| H  | 70.98096 | -24.10042 | 39.33881 |
| C  | 71.39543 | -23.33059 | 38.68492 |
| C  | 71.57859 | -22.02663 | 39.12628 |
| H  | 71.30690 | -21.75083 | 40.14928 |
| C  | 72.11548 | -21.05535 | 38.25486 |
| H  | 72.26127 | -20.02929 | 38.60384 |
| C  | 72.46908 | -21.40474 | 36.95934 |
| H  | 72.90196 | -20.67314 | 36.27484 |
| C* | 77.18100 | -32.61600 | 44.93300 |
| C* | 77.38500 | -34.14300 | 44.93500 |
| C* | 78.86799 | -34.55900 | 44.69100 |
| C  | 79.05679 | -36.07308 | 44.83038 |
| N  | 80.36730 | -36.51366 | 44.36169 |
| C  | 81.51518 | -36.37255 | 45.03105 |
| N  | 81.51763 | -36.12127 | 46.34975 |
| N  | 82.66988 | -36.47536 | 44.36516 |
| C* | 75.72200 | -32.17300 | 44.73700 |
| O  | 74.77074 | -32.91854 | 44.66881 |
| C* | 81.64500 | -32.53700 | 42.95900 |
| N  | 79.57653 | -31.14321 | 42.44758 |
| C  | 80.31143 | -32.31515 | 42.34509 |
| C  | 78.35836 | -31.31749 | 41.92027 |
| N  | 78.29083 | -32.57368 | 41.48046 |
| C  | 79.48867 | -33.20498 | 41.70775 |
| C* | 76.29600 | -31.58300 | 37.64700 |
| C* | 76.57100 | -32.33800 | 38.96800 |
| S  | 75.40419 | -33.60009 | 39.57809 |
| C* | 77.25800 | -32.00400 | 36.55700 |
| O  | 77.93040 | -31.14792 | 35.97897 |
| N* | 77.36100 | -33.31100 | 36.20100 |
| C* | 78.07701 | -33.82500 | 35.01000 |
| C* | 77.92100 | -35.37700 | 34.73500 |
| S  | 79.12920 | -36.54742 | 35.48857 |
| C* | 71.58700 | -37.27400 | 39.17500 |
| C* | 72.87900 | -37.29900 | 40.00900 |
| C  | 72.82060 | -36.63528 | 41.37294 |
| N  | 72.80817 | -35.17510 | 41.25952 |
| C  | 73.01813 | -34.35683 | 42.29004 |
| N  | 73.02028 | -34.83408 | 43.53838 |
| N  | 73.20631 | -33.04174 | 42.07312 |
| C* | 79.04600 | -41.17200 | 35.58000 |
| O  | 78.28891 | -41.93858 | 34.99869 |
| N* | 79.48900 | -41.34100 | 36.83400 |
| C* | 79.20900 | -42.52700 | 37.59000 |
| C* | 80.08700 | -42.37100 | 38.83000 |
| C* | 77.70900 | -42.67700 | 37.91600 |
| O  | 77.17461 | -43.77620 | 37.78019 |
| N* | 77.03399 | -41.62000 | 38.40700 |
| C* | 75.58700 | -41.60000 | 38.63700 |
| C* | 75.12400 | -40.17100 | 39.01400 |
| S  | 75.69745 | -39.61155 | 40.66540 |
| C* | 83.75900 | -40.36900 | 37.05500 |
| C* | 82.81000 | -39.35800 | 37.59000 |
| O  | 81.62024 | -39.32286 | 37.26658 |
| N* | 83.37500 | -38.47700 | 38.40900 |
| C* | 82.72300 | -37.30300 | 38.94400 |
| C* | 82.25300 | -37.60100 | 40.39600 |
| S  | 81.46634 | -36.19286 | 41.25341 |
| Fe | 76.99439 | -37.96832 | 39.85328 |
| Fe | 78.45193 | -36.81104 | 37.62168 |
| Fe | 76.90549 | -35.32550 | 39.47955 |
| Fe | 79.34331 | -36.54912 | 40.36489 |
| S  | 79.01616 | -34.84798 | 38.73575 |
| S  | 77.37236 | -36.37227 | 41.55675 |
| S  | 79.09003 | -38.51741 | 39.07315 |

|   |          |           |          |
|---|----------|-----------|----------|
| S | 76.16693 | -36.88805 | 37.92135 |
| H | 77.53259 | -32.14043 | 45.86799 |
| H | 77.75951 | -32.11742 | 44.13880 |
| H | 77.02636 | -34.55655 | 45.89207 |
| H | 76.76186 | -34.59702 | 44.14611 |
| H | 79.54041 | -34.02813 | 45.38756 |
| H | 79.15491 | -34.27378 | 43.67557 |
| H | 78.88938 | -36.40763 | 45.86752 |
| H | 78.31503 | -36.59957 | 44.21359 |
| H | 80.47079 | -36.67095 | 43.34866 |
| H | 82.39148 | -36.06343 | 46.85909 |
| H | 80.67433 | -36.23835 | 46.89780 |
| H | 82.64241 | -36.48072 | 43.34155 |
| H | 75.57681 | -31.06771 | 44.64811 |
| H | 73.39102 | -32.45101 | 42.87730 |
| H | 82.03368 | -33.51387 | 42.63889 |
| H | 81.56934 | -32.53115 | 44.05919 |
| H | 82.36799 | -31.76096 | 42.66266 |
| H | 79.90562 | -30.26914 | 42.85196 |
| H | 77.58297 | -30.56198 | 41.84874 |
| H | 77.46485 | -33.02195 | 41.06064 |
| H | 79.66237 | -34.22529 | 41.39715 |
| H | 75.25555 | -31.73307 | 37.31461 |
| H | 76.44458 | -30.50659 | 37.77374 |
| H | 76.59058 | -31.56760 | 39.74800 |
| H | 77.58110 | -32.75605 | 38.92310 |
| H | 76.77241 | -33.98160 | 36.69012 |
| H | 77.68946 | -33.29150 | 34.12470 |
| H | 79.14548 | -33.56895 | 35.08993 |
| H | 78.04425 | -35.51094 | 33.65112 |
| H | 76.89912 | -35.69949 | 34.98896 |
| H | 71.74262 | -37.79229 | 38.21636 |
| H | 71.25737 | -36.24627 | 38.94386 |
| H | 70.76228 | -37.77756 | 39.70647 |
| H | 73.71933 | -36.86456 | 39.44073 |
| H | 73.17244 | -38.34296 | 40.18920 |
| H | 73.71566 | -36.93048 | 41.94755 |
| H | 71.92678 | -36.97589 | 41.92757 |
| H | 72.72447 | -34.75948 | 40.33613 |
| H | 72.78715 | -35.79974 | 43.73054 |
| H | 73.45216 | -34.28437 | 44.27611 |
| H | 73.63454 | -32.77317 | 41.18520 |
| H | 79.43243 | -40.23478 | 35.11257 |
| H | 80.19817 | -40.67342 | 37.15396 |
| H | 79.45486 | -43.43743 | 37.02123 |
| H | 79.84096 | -41.43925 | 39.36208 |
| H | 81.14758 | -42.33605 | 38.53578 |
| H | 79.95410 | -43.21285 | 39.52715 |
| H | 77.52744 | -40.73106 | 38.46737 |
| H | 75.32108 | -42.31819 | 39.43042 |
| H | 75.06620 | -41.92154 | 37.71749 |
| H | 74.02336 | -40.16721 | 39.02797 |
| H | 75.42790 | -39.47074 | 38.22433 |
| H | 83.56303 | -36.46564 | 44.84219 |
| H | 83.27667 | -41.35822 | 37.04013 |
| H | 83.98942 | -40.11376 | 36.00703 |
| H | 84.70330 | -40.43561 | 37.61412 |
| H | 84.36263 | -38.58292 | 38.60977 |
| H | 81.85113 | -37.06404 | 38.31673 |
| H | 83.13107 | -37.90218 | 40.99109 |
| H | 81.56513 | -38.45526 | 40.37221 |
| H | 83.41602 | -36.44835 | 38.92722 |

## SI References

- <sup>1</sup> Zwicker, K. *et al.*, *J. Biol. Chem.* **2006**, *281*, 23013-23017
- <sup>2</sup> Di Luca A.; Gamiz-Hernandez, A.P.; Kaila, V. R. I. *Proc. Natl. Acad. Sci. USA* **2017**, *114*, E6341-E6321.
- <sup>3</sup> Ohnishi, T., *Biochim. Biophys. Acta - Bioenergetics* **1998**, *1364*, 186-206.
- <sup>4</sup> Yagi T., Matsuno-Yagi A., *Biochemistry* **2003**, *42*, 2266-2274.
- <sup>5</sup> Verkhovskaya, M.; Wikström, M., *Biochim. Biophys. Acta* **2014**, *1837*, 246-250.
- <sup>6</sup> Hirst, J.; Roessler, M. M., *Biochim. Biophys. Acta* **2016**, *1857*, 872-883.
- <sup>7</sup> Kieseritzky, G.; Knapp, E. W., *J. Comput. Chem.* **2008**, *29*, 2575-2581.
- <sup>8</sup> Moesca, J.-M.; Chen, J. L.; Noodleman, L.; Bashford, D.; Case, D. A., *J. Am. Chem. Soc.* **1994**, *116*, 11898-11914.
- <sup>9</sup> Prince, R. C.; Dutton, P. L.; Bruce, J. M., *FEBS Lett.* **1983**, *160*, 273-276.
- <sup>10</sup> Reiss H.; Heller A. J., *J. Phys. Chem.* **1985**, *89*, 4207-4213.
